# Supplementary material
Source: MDPI journal article supplement (https://www.mdpi.com/2306-5729/7/5/60)
Supplement: s1 [file s1]

Archive with 3 entries (3 files):
- Document S1_The questionnaire form.pdf
- Table S1 The raw data and obtained ORs.xlsx
- Table S2_The calculation sheet for data analysis.xlsx
