# Supplementary material
Source: MDPI journal article supplement (https://www.mdpi.com/2306-5729/7/5/60)
Supplement: s1 [file s1 › Table S1 The raw data and obtained ORs.xlsx]

## Sheet: Sheet1
		Part1: Demographic information						Part 2: Experts' responses to BEs																																									Part 3: Weight of each expert to each BE
	Expert ID	PP	PPS	ST	STS	EL	ELS	BE1	BE2	BE3	BE4	BE5	BE6	BE7	BE8	BE9	BE10	BE11	BE12	BE13	BE14	BE15	BE16	BE17	BE18	BE19	BE20	BE21	BE22	BE23	BE24	BE25	BE26	BE27	BE28	BE29	BE30	BE31	BE32	BE33	BE34	BE35	BE36	BE37	BE38	BE39	BE40	BE41	WBE1
	E1	JM	4	10~19	3	Bachelor	3	1	1	1	2	2	1	2	2	1	2	2	2	2	3	3	2	2	3	1	7	7	5	3	3	3	NR	NR	NR	NR	NR	NR	NR	NR	NR	NR	NR	NR	NR	NR	NR	NR	0.00657462
	E2	E	3	20~29	4	Bachelor	3	4	3	3	3	4	2	2	2	3	2	3	4	3	3	3	2	2	3	5	5	5	5	4	3	3	NR	NR	NR	NR	NR	NR	NR	NR	NR	NR	NR	NR	NR	NR	NR	NR	0.00657462
	E3	E	3	10~19	3	Master	4	3	2	2	2	4	3	2	2	3	3	2	1	2	3	3	3	3	2	1	5	2	4	4	3	5	NR	NR	NR	NR	NR	NR	NR	NR	NR	NR	NR	NR	NR	NR	NR	NR	0.00657462
	E4	E	3	10~19	3	Master	4	3	2	5	5	5	2	2	3	3	3	3	6	5	6	6	5	6	3	4	6	5	5	5	5	6	NR	NR	NR	NR	NR	NR	NR	NR	NR	NR	NR	NR	NR	NR	NR	NR	0.00657462
	E5	E	3	10~19	3	Master	4	4	5	3	4	5	3	3	3	3	3	4	3	3	4	4	4	4	3	4	7	5	5	4	5	5	NR	NR	NR	NR	NR	NR	NR	NR	NR	NR	NR	NR	NR	NR	NR	NR	0.00657462
	E6	E	3	20~29	4	Bachelor	3	2	2	3	3	4	2	1	2	1	2	2	7	7	7	7	4	6	3	2	6	7	7	4	7	7	NR	NR	NR	NR	NR	NR	NR	NR	NR	NR	NR	NR	NR	NR	NR	NR	0.00657462
	E7	SM	5	20~29	4	Bachelor	3	4	1	2	2	4	2	1	2	3	2	3	1	3	1	4	4	4	3	4	6	3	5	4	4	5	NR	NR	NR	NR	NR	NR	NR	NR	NR	NR	NR	NR	NR	NR	NR	NR	0.00788955
	E8	T	2	20~29	4	Bachelor	3	2	2	4	4	6	2	7	5	3	4	5	6	3	2	5	3	2	1	2	4	5	5	2	2	4	NR	NR	NR	NR	NR	NR	NR	NR	NR	NR	NR	NR	NR	NR	NR	NR	0.00591716
	E9	E	3	10~19	3	Master	4	5	3	3	3	5	2	2	2	2	2	3	3	2	6	6	3	3	3	5	7	6	6	7	4	6	NR	NR	NR	NR	NR	NR	NR	NR	NR	NR	NR	NR	NR	NR	NR	NR	0.00657462
	E10	T	2	GE30	5	PhD	5	4	1	2	2	2	2	2	2	2	2	1	2	3	2	4	4	4	1	2	4	4	4	NR	3	NR	NR	NR	NR	NR	NR	NR	NR	NR	NR	NR	NR	NR	NR	NR	NR	NR	0.00788955
	E11	T	2	10~19	3	Master	4	1	2	1	1	2	1	1	1	1	1	1	1	1	1	1	1	1	1	2	2	1	1	1	1	1	NR	NR	NR	NR	NR	NR	NR	NR	NR	NR	NR	NR	NR	NR	NR	NR	0.00591716
	E12	E	3	GE30	5	Master	4	5	5	2	2	3	1	5	2	2	2	2	3	3	2	5	2	3	5	2	5	5	5	4	5	2	NR	NR	NR	NR	NR	NR	NR	NR	NR	NR	NR	NR	NR	NR	NR	NR	0.00788955
	E13	T	2	6~9	2	Bachelor	3	5	3	4	2	4	1	2	2	3	4	3	4	3	3	5	3	3	4	3	2	5	5	4	3	4	NR	NR	NR	NR	NR	NR	NR	NR	NR	NR	NR	NR	NR	NR	NR	NR	0.00460224
	E14	JM	4	GE30	5	Bachelor	3	5	5	3	3	2	2	3	6	2	2	2	5	3	6	7	4	6	5	3	6	6	6	4	3	4	NR	NR	NR	NR	NR	NR	NR	NR	NR	NR	NR	NR	NR	NR	NR	NR	0.00788955
	E15	T	2	20~29	4	PhD	5	7	3	4	4	3	4	3	3	2	2	2	2	2	6	7	4	6	5	7	4	4	6	6	3	3	NR	NR	NR	NR	NR	NR	NR	NR	NR	NR	NR	NR	NR	NR	NR	NR	0.00723208
	E16	SM	5	6~9	2	PhD	5	6	4	4	4	4	3	2	2	2	2	2	4	3	3	4	3	3	3	3	3	3	3	3	4	4	NR	NR	NR	NR	NR	NR	NR	NR	NR	NR	NR	NR	NR	NR	NR	NR	0.00788955
	E17	SM	5	10~19	3	Bachelor	3	2	6	5	3	6	5	1	7	7	5	3	3	1	1	2	2	2	3	4	4	5	4	5	4	6	NR	NR	NR	NR	NR	NR	NR	NR	NR	NR	NR	NR	NR	NR	NR	NR	0.00723208
	E18	JM	4	10~19	3	Bachelor	3	4	3	2	2	4	3	1	3	2	2	2	4	4	3	5	4	3	3	3	5	3	4	3	4	3	NR	NR	NR	NR	NR	NR	NR	NR	NR	NR	NR	NR	NR	NR	NR	NR	0.00657462
	E19	SM	5	20~29	4	Bachelor	3	5	5	3	4	5	2	3	3	6	5	3	7	4	6	7	5	7	6	4	7	7	7	6	6	7	NR	NR	NR	NR	NR	NR	NR	NR	NR	NR	NR	NR	NR	NR	NR	NR	0.00788955
	E20	JM	4	GE30	5	Bachelor	3	3	6	2	2	5	2	1	2	2	2	2	2	4	2	3	6	5	4	6	6	5	6	3	2	6	NR	NR	NR	NR	NR	NR	NR	NR	NR	NR	NR	NR	NR	NR	NR	NR	0.00788955
	E21	E	3	10~19	3	Bachelor	3	7	7	6	6	5	6	4	6	6	6	7	7	5	5	6	5	5	7	6	4	6	6	7	5	6	NR	NR	NR	NR	NR	NR	NR	NR	NR	NR	NR	NR	NR	NR	NR	NR	0.00591716
	E22	E	3	LE5	1	PhD	5	3	3	3	3	5	3	3	2	2	2	6	5	3	5	5	4	5	3	2	5	5	2	6	2	5	NR	NR	NR	NR	NR	NR	NR	NR	NR	NR	NR	NR	NR	NR	NR	NR	0.00591716
	E23	T	2	20~29	4	PhD	5	3	6	4	3	5	2	7	4	6	1	1	7	3	4	6	2	2	1	2	5	6	7	3	2	6	NR	NR	NR	NR	NR	NR	NR	NR	NR	NR	NR	NR	NR	NR	NR	NR	0.00723208
	E24	T	2	6~9	2	Master	4	3	4	2	2	3	2	2	2	3	1	2	4	1	2	3	3	3	1	1	6	4	5	1	4	4	NR	NR	NR	NR	NR	NR	NR	NR	NR	NR	NR	NR	NR	NR	NR	NR	0.0052597
	E25	SM	5	GE30	5	Bachelor	3	6	4	3	3	5	3	3	3	4	3	3	6	6	6	5	2	5	4	2	6	2	6	4	3	3	NR	NR	NR	NR	NR	NR	NR	NR	NR	NR	NR	NR	NR	NR	NR	NR	0.00854701
	E26	JM	4	20~29	4	Bachelor	3	2	2	4	4	2	4	1	2	2	3	3	3	1	2	2	3	3	3	1	1	2	2	2	2	3	NR	NR	NR	NR	NR	NR	NR	NR	NR	NR	NR	NR	NR	NR	NR	NR	0.00723208
	E27	SM	5	GE30	5	Bachelor	3	1	1	1	1	1	1	1	1	1	1	1	1	1	1	1	1	1	1	2	2	1	1	1	1	2	NR	NR	NR	NR	NR	NR	NR	NR	NR	NR	NR	NR	NR	NR	NR	NR	0.00854701
	E28	E	3	GE30	5	Master	4	6	3	3	4	4	3	2	3	2	3	4	2	3	3	3	3	3	3	3	6	4	4	4	4	5	NR	NR	NR	NR	NR	NR	NR	NR	NR	NR	NR	NR	NR	NR	NR	NR	0.00788955
	E29	SM	5	10~19	3	Master	4	1	1	2	3	5	4	1	3	3	3	4	5	2	2	4	3	4	2	1	2	2	4	3	2	4	3	3	3	3	4	3	3	3	3	2	3	3	3	3	2	2	0.00788955
	E30	T	2	GE30	5	PhD	5	2	1	2	2	5	3	3	3	2	2	2	5	2	5	5	4	5	2	1	2	4	4	2	2	3	2	3	3	3	3	2	3	4	2	2	2	1	3	2	2	3	0.00788955
	E31	SM	5	20~29	4	VE	2	1	3	2	1	3	2	1	3	3	2	2	2	4	4	4	2	2	3	2	7	4	7	2	1	5	7	7	5	2	2	7	7	3	3	NR	1	3	2	1	2	3	0.00723208
	E32	E	3	10~19	3	PhD	5	5	5	3	3	5	2	1	2	4	3	1	5	5	5	6	4	5	2	3	6	6	6	5	5	5	5	5	5	3	6	6	5	5	5	6	6	6	6	5	6	6	0.00723208
	E33	T	2	10~19	3	Master	4	5	3	2	2	5	1	1	2	4	3	3	2	2	4	5	2	4	5	5	7	7	6	5	4	6	6	5	5	5	5	6	5	5	5	2	4	4	5	5	5	5	0.00591716
	E34	SM	5	20~29	4	Master	4	1	2	3	3	4	1	1	1	1	1	1	2	2	2	2	2	2	1	2	2	2	2	2	2	2	2	2	2	2	2	2	2	2	2	2	2	2	3	2	2	3	0.00854701
	E35	W	1	10~19	3	Bachelor	3	2	4	3	3	4	1	1	2	3	2	2	1	2	2	2	2	2	2	NR	NR	NR	NR	2	NR	NR	NR	NR	NR	NR	NR	NR	NR	NR	NR	NR	NR	NR	NR	NR	NR	NR	0.00460224
	E36	SM	5	20~29	4	Master	4	2	2	1	1	1	1	1	1	1	1	1	2	1	2	1	1	1	1	1	3	3	3	2	2	3	3	3	2	1	4	4	3	3	2	2	1	1	2	3	3	3	0.00854701
	E37	T	2	10~19	3	Bachelor	3	5	3	4	4	5	3	1	2	3	2	2	2	3	2	7	3	3	2	1	1	2	3	2	1	4	4	4	4	2	2	2	2	4	4	3	1	2	2	5	2	5	0.0052597
	E38	E	3	LE5	1	Master	4	2	2	2	2	2	2	2	2	2	2	2	2	2	2	2	2	2	2	NR	NR	NR	NR	2	NR	NR	NR	NR	NR	NR	NR	NR	NR	NR	NR	NR	NR	NR	NR	NR	NR	NR	0.0052597
	E39	E	3	LE5	1	Master	4	5	3	2	2	5	1	1	3	3	1	2	7	3	2	2	1	1	3	5	5	2	5	5	2	5	4	5	6	6	5	4	4	5	NR	NR	1	3	5	3		5	0.0052597
	E40	E	3	10~19	3	Bachelor	3	4	6	5	5	4	7	4	6	5	6	6	7	4	7	7	7	7	6	5	6	5	7	5	5	7	7	7	7	7	7	7	7	7	6	5	6	5	6	7	7	7	0.00591716
	E41	T	2	6~9	2	Master	4	3	1	1	1	2	2	2	3	4	3	3	6	5	6	6	6	6	2	3	4	5	5	6	4	7	7	6	6	NR	5	5	7	6	2	1	3	6	5	6	5	5	0.0052597
	E42	JM	4	10~19	3	Bachelor	3	1	1	1	1	2	1	1	1	1	1	1	1	1	1	1	1	1	1	3	2	2	2	1	2	2	2	2	2	3	2	2	2	2	3	2	2	2	2	1	1	1	0.00657462
	E43	E	3	6~9	2	Master	4	1	5	5	5	6	5	2	1	1	3	1	4	7	5	2	5	2	2	5	3	3	2	6	4	6	5	2	4	5	3	6	5	2	4	4	6	4	3	5	4	2	0.00591716
	E44	JM	4	10~19	3	Master	4	2	2	1	1	2	1	1	1	1	1	2	2	2	3	3	2	2	1	2	5	5	5	5	6	6	6	6	5	5	3	5	6	6	2	6	4	4	4	6	6	6	0.00723208
	E45	JM	4	10~19	3	Master	4	5	3	4	4	5	5	3	4	2	3	2	6	6	6	6	3	5	5	3	4	4	5	5	5	6	6	6	6	4	7	5	5	5	4	5	3	5	6	5	3	5	0.00723208
	E46	E	3	20~29	4	Bachelor	3	5	4	3	6	6	5	4	4	4	3	4	5	5	5	6	6	5	3	5	5	5	5	6	6	6	6	5	5	5	5	6	6	6	5	4	6	5	5	5	5	5	0.00657462
	E47	E	3	20~29	4	Bachelor	3	5	5	2	2	4	2	2	3	3	3	3	4	3	4	5	2	3	3	2	2	3	2	4	2	2	2	2	2	2	2	3	2	3	4	4	1	1	2	2	2	2	0.00657462
	E48	E	3	10~19	3	Bachelor	3	3	3	3	3	3	2	3	3	3	3	4	4	4	4	4	4	4	3	3	3	3	4	3	3	3	3	4	3	2	2	3	3	4	3	3	2	3	3	3	2	4	0.00591716
	E49	SM	5	GE30	5	Bachelor	3	6	4	1	2	3	3	2	1	1	1	1	3	2	2	1	1	1	2	2	1	2	2	2	2	2	2	5	4	4	3	2	2	3	2	4	4	4	5	4	4	5	0.00854701
	E50	SM	5	GE30	5	Bachelor	3	5	3	3	3	2	3	2	3	2	3	2	2	1	1	3	2	2	1	NR	NR	NR	2	2	2	NR	NR	NR	NR	NR	NR	NR	NR	NR	2	2	NR	NR	NR	NR	NR	NR	0.00854701
	E51	SM	5	20~29	4	Master	4	2	1	3	1	3	2	2	2	2	2	2	3	3	5	5	2	2	1	3	7	4	4	6	6	6	6	6	6	5	7	5	6	6	3	4	4	2	5	4	4	6	0.00854701
	E52	T	2	10~19	3	Master	4	4	1	2	2	2	2	2	2	2	3	3	3	3	1	1	4	2	1	3	5	4	5	3	3	5	NR	5	5	4	4	5	5	6	2	3	NR	NR	NR	3	3	5	0.00591716
	E53	SM	5	10~19	3	PhD	5	5	3	3	2	2	2	2	2	2	2	2	2	1	2	2	1	1	2	1	1	2	2	1	1	2	1	2	2	3	2	2	2	2	2	3	3	2	2	2	2	2	0.00854701
	E54	JM	4	20~29	4	Bachelor	3	7	4	2	3	4	2	2	2	1	1	1	3	2	3	4	4	2	2	3	2	2	3	2	2	3	2	3	3	2	2	2	3	3	2	3	2	2	3	2	2	3	0.00723208
	E55	SM	5	20~29	4	Master	4	1	1	2	2	2	2	2	2	2	2	4	2	2	2	2	2	2	1	NR	1	1	1	1	1	1	5	1	1	4	3	2	5	2	3	3	3	3	3	2	2	2	0.00854701
	E56	JM	4	20~29	4	Master	4	2	1	1	2	2	1	1	1	2	2	2	1	2	2	2	2	3	1	2	2	2	2	2	2	3	3	3	2	2	2	3	3	3	1	2	2	1	2	2	2	2	0.00788955
	E57	E	3	10~19	3	Master	4	3	2	5	5	6	4	2	4	3	4	3	5	3	5	4	4	4	1	2	5	5	5	4	2	3	3	4	3	3	3	NR	3	NR	3	2	1	1	3	3	3	3	0.00657462
	E58	SM	5	20~29	4	Master	4	6	1	1	1	1	1	1	1	1	1	1	1	1	1	1	1	1	1	2	1	1	1	1	1	1	1	1	1	1	1	1	1	1	1	1	1	1	1	1	1	1	0.00854701
	E59	JM	4	20~29	4	Master	4	6	5	6	4	7	5	5	4	4	3	4	4	4	4	2	4	2	5	3	1	1	4	4	4	4	4	4	3	5	4	4	4	5	4	5	1	2	3	2	2	2	0.00788955
	E60	JM	4	10~19	3	Bachelor	3	3	2	2	1	2	3	1	1	2	1	1	6	3	4	2	5	4	1	2	6	6	5	3	3	5	NR	NR	NR	NR	NR	NR	NR	NR	1	6	NR	NR	NR	NR	NR	NR	0.00657462
	E61	SM	5	20~29	4	Master	4	5	4	5	5	5	5	5	5	5	5	7	6	6	5	5	7	7	6	5	6	5	6	6	6	6	6	5	5	5	5	5	6	5	4	3	4	5	5	5	5	5	0.00854701
	E62	SM	5	20~29	4	Bachelor	3	4	4	4	4	4	4	4	4	4	4	4	4	4	4	4	4	4	4	4	4	4	4	4	4	4	4	4	4	4	4	4	4	4	4	4	4	4	4	4	4	4	0.00788955
	E63	SM	5	GE30	5	Master	4	2	2	2	3	2	3	2	2	3	3	3	4	4	3	5	3	3	2	3	3	3	4	2	2	3	3	3	3	3	4	3	3	3	2	3	2	3	4	3	2	2	0.00920447
	E64	JM	4	10~19	3	Master	4	2	2	2	2	2	1	2	3	2	2	2	3	2	3	3	2	1	2	3	3	3	2	2	1	2	2	2	2	2	3	3	2	2	2	1	2	1	2	2	2	1	0.00723208
	E65	JM	4	10~19	3	Bachelor	3	3	3	2	2	2	1	1	1	1	1	1	1	1	1	5	5	5	4	1	6	2	2	2	4	4	4	4	4	4	4	4	4	4	3	2	5	4	4	4	4	4	0.00657462
	E66	T	2	GE30	5	VE	2	4	1	2	2	1	1	1	1	1	1	3	1	1	3	3	1	2	2	NR	NR	NR	NR	4	NR	NR	NR	NR	NR	NR	NR	NR	NR	NR	NR	NR	NR	NR	NR	2	2	1	0.00591716
	E67	E	3	GE30	5	Master	4	1	1	1	1	1	1	2	2	2	1	2	2	1	1	1	1	2	2	2	3	1	2	3	2	3	3	2	3	2	2	2	2	2	2	2	2	2	2	2	2	2	0.00788955
	E68	JM	4	GE30	5	Master	4	6	5	7	6	7	5	5	6	5	5	4	2	4	2	2	3	3	2	4	6	4	3	2	2	3	3	5	6	5	5	5	5	5	2	2	2	2	2	3	3	5	0.00854701
	E69	E	3	20~29	4	Bachelor	3	5	4	5	4	3	3	2	3	3	3	2	3	1	1	2	2	1	1	3	2	2	3	3	1	3	NR	NR	NR	NR	NR	NR	NR	NR	NR	NR	NR	NR	NR	2	2	3	0.00657462
	E70	JM	4	10~19	3	Master	4	4	4	4	4	3	4	3	4	5	6	5	3	5	4	4	4	3	3	2	6	3	5	5	5	5	5	5	4	5	5	5	5	5	5	4	5	5	4	5	5	5	0.00723208
	E71	SM	5	GE30	5	Bachelor	3	7	3	3	3	6	3	1	2	2	2	2	7	3	4	7	5	6	3	3	7	7	7	2	2	6	6	7	3	3	7	6	7	7	2	3	2	2	6	2	5	5	0.00854701
	E72	JM	4	20~29	4	Bachelor	3	2	2	4	5	3	1	1	2	2	1	1	2	2	5	3	2	2	1	3	2	4	3	1	1	3	3	3	4	3	2	3	3	3	2	1	1	1	2	2	2	2	0.00723208
	E73	SM	5	10~19	3	Master	4	5	3	2	2	2	2	2	2	2	2	2	2	3	4	5	2	2	4	3	3	3	4	4	4	5	5	4	4	3	3	4	5	4	3	4	3	4	4	4	4	4	0.00788955
	E74	SM	5	20~29	4	Master	4	2	2	3	2	3	3	2	2	2	2	2	3	3	3	3	3	3	3	3	4	3	4	3	3	3	3	3	3	3	3	3	3	3	2	3	2	2	3	2	2	3	0.00854701
	E75	E	3	10~19	3	Master	4	7	1	4	4	4	3	4	5	4	3	2	2	2	2	2	2	2	2	5	5	4	4	4	4	4	3	3	3	3	3	3	3	3	2	1	2	2	2	1	1	1	0.00657462
	E76	SM	5	20~29	4	Master	4	1	1	2	2	3	3	2	2	1	1	2	4	1	2	1	1	1	1	1	1	1	3	2	1	2	2	3	1	2	1	2	2	4	2	3	3	1	4	1	1	3	0.00854701
	E77	SM	5	6~9	2	Master	4	5	6	6	5	5	6	5	6	5	6	5	6	5	6	5	6	6	5	4	4	5	5	5	4	6	5	4	5	3	3	4	5	4	4	6	5	4	5	4	5	5	0.00723208
	E78	T	2	10~19	3	Bachelor	3	1	2	2	2	4	1	1	1	2	2	2	3	2	3	4	3	2	1	2	1	3	3	3	3	2	3	3	3	3	3	3	3	3	2	1	1	2	3	3	3	3	0.0052597
	E79	SM	5	10~19	3	VE	2	2	3	2	1	2	2	2	1	1	2	1	1	1	2	2	1	2	3	2	3	3	2	2	2	2	2	3	3	2	3	3	2	2	2	2	2	1	2	2	2	2	0.00657462
	E80	JM	4	GE30	5	Bachelor	3	3	3	1	2	4	3	4	1	2	1	3	1	3	2	2	3	3	3	NR	5	5	5	3	3	3	3	4	3	3	5	3	NR	NR	NR	NR	NR	NR	NR	3	3	4	0.00788955
	E81	E	3	10~19	3	PhD	5	2	3	4	1	2	6	5	5	5	2	2	5	5	7	7	6	5	3	2	2	2	6	3	3	6	NR	NR	NR	NR	NR	NR	NR	NR	3	5	NR	NR	NR	NR	NR	NR	0.00723208
	E82	JM	4	10~19	3	Bachelor	3	4	4	3	3	4	3	2	3	3	3	3	5	2	2	1	2	2	1	2	1	2	2	3	3	2	2	2	2	2	2	2	2	5	5	2	4	2	4	3	3	3	0.00657462
	E83	SM	5	20~29	4	PhD	5	6	6	5	6	7	5	5	4	4	5	3	5	4	5	6	6	4	5	5	6	3	5	6	3	5	5	5	4	4	4	5	5	5	5	6	4	5	5	6	6	5	0.00920447
	E84	SM	5	10~19	3	Master	4	3	3	3	3	4	4	2	3	3	2	2	2	2	3	4	3	4	4	5	5	5	5	4	4	5	5	5	4	3	4	4	4	4	3	4	5	3	4	4	5	5	0.00788955
	E85	JM	4	6~9	2	Bachelor	3	2	1	1	1	3	1	1	1	1	1	1	3	4	4	4	1	1	1	3	5	2	5	3	3	5	5	6	6	4	4	5	5	6	1	1	2	2	3	4	5	5	0.00591716
	E86	SM	5	10~19	3	Master	4	4	2	2	3	5	5	1	4	3	3	3	4	3	3	4	3	3	3	5	5	4	4	4	4	3	3	4	3	3	3	3	3	3	NR	5	2	3	3	4	3	3	0.00788955
	E87	E	3	10~19	3	Bachelor	3	5	3	1	2	3	3	3	2	3	1	2	4	3	6	4	2	2	1	1	1	3	3	3	3	2	3	3	4	1	3	2	3	2	1	3	3	2	2	3	2	2	0.00591716
	E88	SM	5	10~19	3	Master	4	4	2	3	3	5	2	1	2	2	3	5	6	5	6	6	5	5	3	1	1	3	4	2	2	4	NR	NR	NR	NR	NR	NR	NR	NR	2	2	6	6	7	NR	NR	NR	0.00788955
	E89	SM	5	20~29	4	PhD	5	3	3	2	2	2	3	1	2	2	2	1	2	1	5	5	4	4	2	4	3	3	4	4	3	4	3	4	4	4	3	3	3	4	3	2	5	4	5	3	3	4	0.00920447
	E90	E	3	GE30	5	Bachelor	3	1	1	2	3	1	2	1	2	1	1	1	1	1	2	2	1	1	2	NR	6	6	6	6	6	5	5	5	2	1	6	4	5	4	1	4	1	1	4	2	4	4	0.00723208
	E91	E	3	10~19	3	Master	4	4	3	3	3	2	2	1	1	1	1	1	1	1	1	1	1	1	1	1	1	1	1	1	1	1	1	3	2	1	4	4	2	2	1	1	1	1	1	1	1	1	0.00657462
	E92	E	3	GE30	5	Bachelor	3	7	2	2	2	6	1	2	2	2	6	6	3	3	3	3	2	2	6	2	7	3	6	3	2	6	2	2	7	2	7	3	3	3	3	7	5	4	3	3	4	3	0.00723208
	E93	SM	5	GE30	5	Master	4	2	2	1	1	2	2	1	2	1	2	2	1	2	1	2	2	1	1	1	2	2	2	1	2	1	2	1	1	1	1	1	1	1	2	1	1	1	1	1	2	1	0.00920447
	E94	SM	5	20~29	4	Master	4	5	3	2	2	3	3	3	3	2	2	2	3	3	4	3	3	3	3	3	2	3	4	4	2	4	4	4	3	3	2	3	3	3	3	4	4	3	3	4	3	3	0.00854701
	E95	SM	5	10~19	3	Bachelor	3	3	3	4	3	4	3	3	3	2	2	2	2	2	2	2	2	2	2	2	2	2	2	2	2	2	2	2	2	2	2	2	2	2	2	1	1	1	1	2	2	1	0.00723208
	E96	JM	4	20~29	4	Bachelor	3	3	2	2	3	5	2	1	3	2	3	2	6	6	6	7	6	6	3	5	7	4	7	5	7	7	7	7	5	5	7	7	7	7	3	4	4	4	7	7	6	7	0.00723208
	E97	SM	5	GE30	5	Bachelor	3	5	5	6	4	5	4	4	5	4	5	5	4	3	4	2	3	2	4	4	2	2	5	4	2	3	2	2	4	4	2	3	2	4	5	6	2	5	2	5	5	2	0.00854701
	E98	JM	4	GE30	5	Master	4	6	3	3	4	5	3	4	2	2	2	2	2	2	3	3	2	4	3	2	5	3	5	3	2	3	2	4	3	2	3	3	3	3	2	2	2	2	2	3	2	3	0.00854701
	E99	E	3	6~9	2	Bachelor	3	5	5	5	5	5	5	5	5	5	5	5	5	5	5	5	4	5	6	5	4	6	4	6	5	5	4	5	5	5	5	5	5	5	6	4	5	5	5	5	4	6	0.0052597
	E100	E	3	10~19	3	Bachelor	3	5	1	3	1	1	1	1	1	1	1	1	1	1	1	3	1	1	1	3	7	3	1	4	3	7	7	4	4	1	3	3	7	4	5	2	3	3	3	1	3	3	0.00591716
	E101	SM	5	10~19	3	Bachelor	3	7	3	2	1	7	4	4	2	4	4	4	5	4	2	5	3	4	6	5	6	5	5	5	5	5	5	5	5	5	3	5	5	4	6	6	4	4	4	5	5	5	0.00723208
	E102	SM	5	20~29	4	PhD	5	3	3	3	3	2	1	1	3	3	4	4	5	2	4	4	1	1	2	5	6	5	5	6	2	5	5	5	5	6	4	4	5	5	4	2	3	2	3	3	3	4	0.00920447
	E103	SM	5	10~19	3	Bachelor	3	1	2	1	2	3	1	1	1	1	2	2	4	2	2	3	1	1	2	2	2	2	3	1	1	2	2	3	2	3	4	2	1	2	2	1	2	2	2	2	2	2	0.00723208
	E104	SM	5	20~29	4	Bachelor	3	6	6	5	4	6	4	4	5	4	3	4	6	6	5	1	1	1	1	1	1	1	2	5	2	4	3	4	3	1	2	3	2	3	4	4	2	3	4	4	3	2	0.00788955
	E105	E	3	10~19	3	Bachelor	3	7	4	3	4	6	1	1	1	3	4	3	6	6	6	6	7	5	5	3	3	3	3	5	5	6	5	6	5	5	5	5	6	5	2	2	5	5	5	3	3	5	0.00591716
	E106	SM	5	10~19	3	Bachelor	3	5	2	4	4	4	4	4	4	4	2	2	2	2	2	2	2	2	3	3	5	2	3	4	4	4	4	4	4	4	4	4	4	4	4	3	3	3	4	5	5	2	0.00723208
	E107	E	3	20~29	4	Master	4	2	2	2	2	4	3	1	3	4	2	3	7	3	7	7	2	7	4	NR	7	7	7	7	7	7	7	7	NR	7	7	7	7	7	2	2	7	7	7	7	6	7	0.00723208
	E108	JM	4	10~19	3	Master	4	3	3	3	5	5	3	2	2	3	2	2	2	5	6	5	5	5	2	4	4	3	4	4	4	4	4	4	5	4	4	4	4	4	3	3	3	2	4	4	3	4	0.00723208
	E109	E	3	20~29	4	Bachelor	3	2	1	1	1	2	1	1	1	1	1	1	2	2	2	3	2	3	2	1	3	2	2	3	2	2	2	2	2	2	3	2	2	3	2	2	3	2	3	2	2	3	0.00657462
	E110	T	2	10~19	3	Bachelor	3	1	1	1	1	3	1	1	1	1	2	1	3	1	1	1	1	1	1	4	3	1	1	2	2	3	1	1	1	1	1	1	1	1	1	2	1	1	1	3	1	1	0.0052597
	E111	SM	5	GE30	5	Master	4	5	3	3	5	3	3	5	4	5	5	4	4	4	4	5	4	4	4	4	4	5	4	4	5	4	4	4	4	4	4	5	4	5	4	4	4	4	5	4	4	5	0.00920447
	E112	JM	4	10~19	3	Master	4	5	6	5	5	5	5	5	6	5	6	6	5	6	6	6	5	5	5	4	4	4	4	4	5	5	4	4	4	4	5	5	5	4	4	5	4	4	4	5	5	5	0.00723208
	E113	SM	5	10~19	3	Master	4	5	2	2	2	3	3	3	3	2	1	2	2	2	2	2	2	3	3	2	2	3	5	5	4	5	5	3	3	3	4	4	4	4	2	4	4	4	4	4	4	5	0.00788955
	E114	T	2	20~29	4	Master	4	2	1	3	3	4	2	1	1	3	1	3	3	2	1	3	2	2	2	3	4	3	4	2	2	2	2	3	4	2	2	3	2	3	3	1	1	1	3	3	2	3	0.00657462
	E115	SM	5	10~19	3	Master	4	3	3	5	5	4	4	1	1	3	3	4	4	4	4	4	5	5	5	6	3	4	4	4	4	4	6	3	3	5	2	5	5	5	4	7	3	4	5	7	4	5	0.00788955
	E116	SM	5	20~29	4	Master	4	3	2	1	1	1	2	1	3	3	4	3	2	1	2	2	2	1	2	3	2	1	3	2	1	3	3	3	2	1	1	2	2	3	2	2	1	2	2	2	2	2	0.00854701
	E117	SM	5	20~29	4	Master	4	3	2	1	1	1	2	1	3	3	4	3	2	1	2	2	2	1	2	3	2	1	3	2	1	3	3	3	2	1	1	2	2	3	2	2	1	2	2	2	2	2	0.00854701
	E118	JM	4	10~19	3	Master	4	4	2	2	2	2	2	2	2	2	1	2	2	2	3	4	2	2	2	NR	NR	NR	NR	3	NR	NR	NR	NR	NR	NR	NR	NR	NR	NR	NR	NR	NR	NR	NR	NR	NR	NR	0.00723208
	E119	T	2	20~29	4	Bachelor	3	4	2	3	2	3	2	1	1	1	1	1	1	1	2	3	1	2	2	2	1	1	1	1	2	2	3	3	3	2	2	2	2	2	1	1	2	2	2	2	2	2	0.00591716
	E120	E	3	GE30	5	Master	4	4	1	4	5	3	5	1	2	1	3	2	6	3	3	5	2	2	2	6	6	3	4	4	5	6	4	4	3	6	6	5	4	5	1	3	NR	NR	NR	NR	NR	NR	0.00788955
	E121	JM	4	10~19	3	Master	4	4	4	4	4	4	4	4	4	4	4	4	4	4	4	4	4	4	4	4	4	4	5	3	5	3	5	3	4	5	3	4	5	5	6	4	4	6	6	4	5	4	0.00723208
	E122	SM	5	GE30	5	Bachelor	3	7	3	3	2	2	2	2	2	3	2	3	3	3	3	3	2	2	2	2	6	2	2	2	6	6	7	5	3	2	7	3	7	3	2	2	1	1	2	4	2	2	0.00854701
	E123	SM	5	20~29	4	Master	4	6	3	2	2	4	2	2	2	2	2	2	4	3	2	2	2	2	2	2	2	2	3	4	3	3	3	3	2	4	3	3	4	3	3	4	2	3	3	2	2	2	0.00854701
	E124	SM	5	GE30	5	Bachelor	3	3	3	3	4	4	3	4	3	3	4	4	4	4	4	4	4	4	3	4	4	4	4	4	4	4	4	4	4	4	4	4	4	4	4	4	4	4	4	4	4	5	0.00854701
	E125	E	3	20~29	4	PhD	5	2	2	3	3	2	2	3	2	2	2	3	2	3	4	2	2	2	2	3	3	3	3	2	2	3	2	2	2	2	2	2	2	2	3	3	2	2	2	2	2	2	0.00788955
	E126	SM	5	10~19	3	PhD	5	7	4	3	6	6	4	3	4	4	4	4	4	4	6	5	5	5	3	4	4	4	4	4	4	4	4	4	4	4	4	4	4	4	5	5	3	3	3	3	4	3	0.00854701
	E127	E	3	10~19	3	Bachelor	3	2	1	1	1	3	1	1	1	2	1	1	5	2	4	5	2	1	2	3	3	4	5	3	3	3	3	3	3	3	3	1	3	3	2	3	1	1	2	1	2	2	0.00591716
	E128	T	2	GE30	5	Bachelor	3	1	2	2	3	4	1	2	2	2	2	3	2	3	2	3	3	3	2	2	3	4	4	5	4	5	5	5	5	3	3	5	5	5	1	1	3	3	5	NR	NR	NR	0.00657462
	E129	SM	5	10~19	3	Bachelor	3	5	5	5	5	6	5	4	4	4	2	3	5	5	7	5	5	5	6	5	5	5	5	5	5	6	5	5	5	5	5	5	5	5	5	5	5	5	5	5	5	5	0.00723208
	E130	JM	4	GE30	5	Master	4	4	4	5	2	3	2	2	2	2	2	2	4	3	2	4	3	4	5	4	5	5	4	4	4	4	5	5	6	5	5	5	6	5	5	5	4	5	4	5	4	4	0.00854701
	E131	SM	5	10~19	3	Master	4	7	7	3	3	3	3	3	3	3	3	3	3	3	2	3	3	3	3	4	1	3	3	3	3	4	4	3	4	4	4	4	4	4	3	3	2	2	2	3	3	2	0.00788955
	E132	SM	5	10~19	3	Master	4	4	2	2	2	2	1	1	1	1	2	2	1	1	1	1	2	1	3	3	3	2	2	2	2	4	NR	NR	NR	NR	NR	NR	NR	NR	NR	NR	NR	NR	NR	NR	NR	NR	0.00788955
	E133	SM	5	GE30	5	Bachelor	3	2	7	5	3	1	1	5	3	2	1	1	6	5	5	6	4	3	3	2	5	2	5	2	1	7	6	6	6	5	5	6	5	4	3	5	2	4	4	5	5	6	0.00854701
	E134	E	3	10~19	3	Bachelor	3	4	2	2	2	5	4	3	2	3	3	4	5	4	4	4	4	3	2	4	6	4	4	4	6	4	4	4	4	3	6	3	4	3	3	2	5	4	5	3	3	4	0.00591716
	E135	SM	5	GE30	5	Master	4	4	3	2	1	5	2	1	2	2	2	3	4	3	2	5	3	3	6	2	2	3	3	2	1	2	2	2	3	2	2	4	2	3	3	2	3	3	5	2	2	4	0.00920447
	E136	SM	5	10~19	3	Master	4	4	5	3	4	4	4	4	4	4	5	6	5	5	5	6	4	5	7	5	5	4	4	5	4	6	5	5	6	4	4	5	6	5	5	1	6	5	5	4	4	4	0.00788955
	E137	SM	5	20~29	4	Master	4	7	5	1	1	3	5	1	4	2	1	3	1	1	1	1	1	1	2	2	1	1	1	1	1	1	1	1	1	1	1	1	1	1	1	2	1	1	1	1	1	1	0.00854701
	Part 4: Occurrence rate							0.00399959	0.00152927	0.00122912	0.0012198	0.00320772	0.000981279	0.000525195	0.000896362	0.000879418	0.000778618	0.000932558	0.00270663	0.00142468	0.00242044	0.00361304	0.00149312	0.00169751	0.0011551	0.00156619	0.00442904	0.00267964	0.00461977	0.00263903	0.00184164	0.00499225	0.00392133	0.00383016	0.00314887	0.00220323	0.00308233	0.00342105	0.00396527	0.00385788	0.00137662	0.00181992	0.00137776	0.00143533	0.00283938	0.00218749	0.00193169	0.002692
	Note: NR=No response.
[truncated: 40 more columns]
