# Supplementary material
Source: MDPI journal article supplement (https://www.mdpi.com/2306-5729/7/5/60)
Supplement: s1 [file s1 › Table S2_The calculation sheet for data analysis.xlsx]

## Sheet: BE1-18
																	BE1										BE2										BE3										BE4
																	excessive ship motion due to operation of ship stabilizing system during cargo loading/unloading.										failure of mooring lines.										failure of LNG bunkering breakaway couplings.										failure of LNG bunkering dry-disconnect/connect couplings.
Expression	a	b	c	d		Expert ID	PP	PPS	ST	STS	EL	ELS	Wi	SUM Ei	SUM		Expression No.	Expression	a	b	c	d	FP	C	OR		Expression No.	Expression	a	b	c	d	FP	C	OR		Expression No.	Expression	a	b	c	d	FP	C	OR		Expression No.	Expression	a
VL	0	0	0.1	0.2		E1	JM	4	10~19	3	Bachelor	3	0.00657462	10	1521		1	VL	0	0	0.000657462	0.00131492					1	VL	0	0	0.000657462	0.00131492					1	VL	0	0	0.000657462	0.00131492					2	L	0.000657462
L	0.1	0.2	0.2	0.3		E2	E	3	20~29	4	Bachelor	3	0.00657462	10			4	M	0.00262985	0.00328731	0.00328731	0.00394477					3	FL	0.00131492	0.00197239	0.00262985	0.00328731					3	FL	0.00131492	0.00197239	0.00262985	0.00328731					3	FL	0.00131492
FL	0.2	0.3	0.4	0.5		E3	E	3	10~19	3	Master	4	0.00657462	10			3	FL	0.00131492	0.00197239	0.00262985	0.00328731					2	L	0.000657462	0.00131492	0.00131492	0.00197239					2	L	0.000657462	0.00131492	0.00131492	0.00197239					2	L	0.000657462
M	0.4	0.5	0.5	0.6		E4	E	3	10~19	3	Master	4	0.00657462	10			3	FL	0.00131492	0.00197239	0.00262985	0.00328731					2	L	0.000657462	0.00131492	0.00131492	0.00197239					5	FH	0.00328731	0.00394477	0.00460224	0.0052597					5	FH	0.00328731
FH	0.5	0.6	0.7	0.8		E5	E	3	10~19	3	Master	4	0.00657462	10			4	M	0.00262985	0.00328731	0.00328731	0.00394477					5	FH	0.00328731	0.00394477	0.00460224	0.0052597					3	FL	0.00131492	0.00197239	0.00262985	0.00328731					4	M	0.00262985
H	0.7	0.8	0.8	0.9		E6	E	3	20~29	4	Bachelor	3	0.00657462	10			2	L	0.000657462	0.00131492	0.00131492	0.00197239					2	L	0.000657462	0.00131492	0.00131492	0.00197239					3	FL	0.00131492	0.00197239	0.00262985	0.00328731					3	FL	0.00131492
VH	0.8	0.9	1	1		E7	SM	5	20~29	4	Bachelor	3	0.00788955	12			4	M	0.00315582	0.00394477	0.00394477	0.00473373					1	VL	0	0	0.000788955	0.00157791					2	L	0.000788955	0.00157791	0.00157791	0.00236686					2	L	0.000788955
						E8	T	2	20~29	4	Bachelor	3	0.00591716	9			2	L	0.000591716	0.00118343	0.00118343	0.00177515					2	L	0.000591716	0.00118343	0.00118343	0.00177515					4	M	0.00236686	0.00295858	0.00295858	0.0035503					4	M	0.00236686
						E9	E	3	10~19	3	Master	4	0.00657462	10			5	FH	0.00328731	0.00394477	0.00460224	0.0052597					3	FL	0.00131492	0.00197239	0.00262985	0.00328731					3	FL	0.00131492	0.00197239	0.00262985	0.00328731					3	FL	0.00131492
						E10	T	2	GE30	5	PhD	5	0.00788955	12			4	M	0.00315582	0.00394477	0.00394477	0.00473373					1	VL	0	0	0.000788955	0.00157791					2	L	0.000788955	0.00157791	0.00157791	0.00236686					2	L	0.000788955
						E11	T	2	10~19	3	Master	4	0.00591716	9			1	VL	0	0	0.000591716	0.00118343					2	L	0.000591716	0.00118343	0.00118343	0.00177515					1	VL	0	0	0.000591716	0.00118343					1	VL	0
						E12	E	3	GE30	5	Master	4	0.00788955	12			5	FH	0.00394477	0.00473373	0.00552268	0.00631164					5	FH	0.00394477	0.00473373	0.00552268	0.00631164					2	L	0.000788955	0.00157791	0.00157791	0.00236686					2	L	0.000788955
						E13	T	2	6~9	2	Bachelor	3	0.00460224	7			5	FH	0.00230112	0.00276134	0.00322156	0.00368179					3	FL	0.000920447	0.00138067	0.00184089	0.00230112					4	M	0.00184089	0.00230112	0.00230112	0.00276134					2	L	0.000460224
						E14	JM	4	GE30	5	Bachelor	3	0.00788955	12			5	FH	0.00394477	0.00473373	0.00552268	0.00631164					5	FH	0.00394477	0.00473373	0.00552268	0.00631164					3	FL	0.00157791	0.00236686	0.00315582	0.00394477					3	FL	0.00157791
						E15	T	2	20~29	4	PhD	5	0.00723208	11			7	VH	0.00578567	0.00650888	0.00723208	0.00723208					3	FL	0.00144642	0.00216963	0.00289283	0.00361604					4	M	0.00289283	0.00361604	0.00361604	0.00433925					4	M	0.00289283
						E16	SM	5	6~9	2	PhD	5	0.00788955	12			6	H	0.00552268	0.00631164	0.00631164	0.00710059					4	M	0.00315582	0.00394477	0.00394477	0.00473373					4	M	0.00315582	0.00394477	0.00394477	0.00473373					4	M	0.00315582
						E17	SM	5	10~19	3	Bachelor	3	0.00723208	11			2	L	0.000723208	0.00144642	0.00144642	0.00216963					6	H	0.00506246	0.00578567	0.00578567	0.00650888					5	FH	0.00361604	0.00433925	0.00506246	0.00578567					3	FL	0.00144642
						E18	JM	4	10~19	3	Bachelor	3	0.00657462	10			4	M	0.00262985	0.00328731	0.00328731	0.00394477					3	FL	0.00131492	0.00197239	0.00262985	0.00328731					2	L	0.000657462	0.00131492	0.00131492	0.00197239					2	L	0.000657462
						E19	SM	5	20~29	4	Bachelor	3	0.00788955	12			5	FH	0.00394477	0.00473373	0.00552268	0.00631164					5	FH	0.00394477	0.00473373	0.00552268	0.00631164					3	FL	0.00157791	0.00236686	0.00315582	0.00394477					4	M	0.00315582
						E20	JM	4	GE30	5	Bachelor	3	0.00788955	12			3	FL	0.00157791	0.00236686	0.00315582	0.00394477					6	H	0.00552268	0.00631164	0.00631164	0.00710059					2	L	0.000788955	0.00157791	0.00157791	0.00236686					2	L	0.000788955
						E21	E	3	10~19	3	Bachelor	3	0.00591716	9			7	VH	0.00473373	0.00532544	0.00591716	0.00591716					7	VH	0.00473373	0.00532544	0.00591716	0.00591716					6	H	0.00414201	0.00473373	0.00473373	0.00532544					6	H	0.00414201
						E22	E	3	LE5	1	PhD	5	0.00591716	9			3	FL	0.00118343	0.00177515	0.00236686	0.00295858					3	FL	0.00118343	0.00177515	0.00236686	0.00295858					3	FL	0.00118343	0.00177515	0.00236686	0.00295858					3	FL	0.00118343
						E23	T	2	20~29	4	PhD	5	0.00723208	11			3	FL	0.00144642	0.00216963	0.00289283	0.00361604					6	H	0.00506246	0.00578567	0.00578567	0.00650888					4	M	0.00289283	0.00361604	0.00361604	0.00433925					3	FL	0.00144642
						E24	T	2	6~9	2	Master	4	0.0052597	8			3	FL	0.00105194	0.00157791	0.00210388	0.00262985					4	M	0.00210388	0.00262985	0.00262985	0.00315582					2	L	0.00052597	0.00105194	0.00105194	0.00157791					2	L	0.00052597
						E25	SM	5	GE30	5	Bachelor	3	0.00854701	13			6	H	0.00598291	0.00683761	0.00683761	0.00769231					4	M	0.0034188	0.0042735	0.0042735	0.00512821					3	FL	0.0017094	0.0025641	0.0034188	0.0042735					3	FL	0.0017094
						E26	JM	4	20~29	4	Bachelor	3	0.00723208	11			2	L	0.000723208	0.00144642	0.00144642	0.00216963					2	L	0.000723208	0.00144642	0.00144642	0.00216963					4	M	0.00289283	0.00361604	0.00361604	0.00433925					4	M	0.00289283
						E27	SM	5	GE30	5	Bachelor	3	0.00854701	13			1	VL	0	0	0.000854701	0.0017094					1	VL	0	0	0.000854701	0.0017094					1	VL	0	0	0.000854701	0.0017094					1	VL	0
						E28	E	3	GE30	5	Master	4	0.00788955	12			6	H	0.00552268	0.00631164	0.00631164	0.00710059					3	FL	0.00157791	0.00236686	0.00315582	0.00394477					3	FL	0.00157791	0.00236686	0.00315582	0.00394477					4	M	0.00315582
						E29	SM	5	10~19	3	Master	4	0.00788955	12			1	VL	0	0	0.000788955	0.00157791					1	VL	0	0	0.000788955	0.00157791					2	L	0.000788955	0.00157791	0.00157791	0.00236686					3	FL	0.00157791
						E30	T	2	GE30	5	PhD	5	0.00788955	12			2	L	0.000788955	0.00157791	0.00157791	0.00236686					1	VL	0	0	0.000788955	0.00157791					2	L	0.000788955	0.00157791	0.00157791	0.00236686					2	L	0.000788955
						E31	SM	5	20~29	4	VE	2	0.00723208	11			1	VL	0	0	0.000723208	0.00144642					3	FL	0.00144642	0.00216963	0.00289283	0.00361604					2	L	0.000723208	0.00144642	0.00144642	0.00216963					1	VL	0
						E32	E	3	10~19	3	PhD	5	0.00723208	11			5	FH	0.00361604	0.00433925	0.00506246	0.00578567					5	FH	0.00361604	0.00433925	0.00506246	0.00578567					3	FL	0.00144642	0.00216963	0.00289283	0.00361604					3	FL	0.00144642
						E33	T	2	10~19	3	Master	4	0.00591716	9			5	FH	0.00295858	0.0035503	0.00414201	0.00473373					3	FL	0.00118343	0.00177515	0.00236686	0.00295858					2	L	0.000591716	0.00118343	0.00118343	0.00177515					2	L	0.000591716
						E34	SM	5	20~29	4	Master	4	0.00854701	13			1	VL	0	0	0.000854701	0.0017094					2	L	0.000854701	0.0017094	0.0017094	0.0025641					3	FL	0.0017094	0.0025641	0.0034188	0.0042735					3	FL	0.0017094
						E35	W	1	10~19	3	Bachelor	3	0.00460224	7			2	L	0.000460224	0.000920447	0.000920447	0.00138067					4	M	0.00184089	0.00230112	0.00230112	0.00276134					3	FL	0.000920447	0.00138067	0.00184089	0.00230112					3	FL	0.000920447
						E36	SM	5	20~29	4	Master	4	0.00854701	13			2	L	0.000854701	0.0017094	0.0017094	0.0025641					2	L	0.000854701	0.0017094	0.0017094	0.0025641					1	VL	0	0	0.000854701	0.0017094					1	VL	0
						E37	T	2	10~19	3	Bachelor	3	0.0052597	8			5	FH	0.00262985	0.00315582	0.00368179	0.00420776					3	FL	0.00105194	0.00157791	0.00210388	0.00262985					4	M	0.00210388	0.00262985	0.00262985	0.00315582					4	M	0.00210388
						E38	E	3	LE5	1	Master	4	0.0052597	8			2	L	0.00052597	0.00105194	0.00105194	0.00157791					2	L	0.00052597	0.00105194	0.00105194	0.00157791					2	L	0.00052597	0.00105194	0.00105194	0.00157791					2	L	0.00052597
						E39	E	3	LE5	1	Master	4	0.0052597	8			5	FH	0.00262985	0.00315582	0.00368179	0.00420776					3	FL	0.00105194	0.00157791	0.00210388	0.00262985					2	L	0.00052597	0.00105194	0.00105194	0.00157791					2	L	0.00052597
						E40	E	3	10~19	3	Bachelor	3	0.00591716	9			4	M	0.00236686	0.00295858	0.00295858	0.0035503					6	H	0.00414201	0.00473373	0.00473373	0.00532544					5	FH	0.00295858	0.0035503	0.00414201	0.00473373					5	FH	0.00295858
						E41	T	2	6~9	2	Master	4	0.0052597	8			3	FL	0.00105194	0.00157791	0.00210388	0.00262985					1	VL	0	0	0.00052597	0.00105194					1	VL	0	0	0.00052597	0.00105194					1	VL	0
						E42	JM	4	10~19	3	Bachelor	3	0.00657462	10			1	VL	0	0	0.000657462	0.00131492					1	VL	0	0	0.000657462	0.00131492					1	VL	0	0	0.000657462	0.00131492					1	VL	0
						E43	E	3	6~9	2	Master	4	0.00591716	9			1	VL	0	0	0.000591716	0.00118343					5	FH	0.00295858	0.0035503	0.00414201	0.00473373					5	FH	0.00295858	0.0035503	0.00414201	0.00473373					5	FH	0.00295858
						E44	JM	4	10~19	3	Master	4	0.00723208	11			2	L	0.000723208	0.00144642	0.00144642	0.00216963					2	L	0.000723208	0.00144642	0.00144642	0.00216963					1	VL	0	0	0.000723208	0.00144642					1	VL	0
						E45	JM	4	10~19	3	Master	4	0.00723208	11			5	FH	0.00361604	0.00433925	0.00506246	0.00578567					3	FL	0.00144642	0.00216963	0.00289283	0.00361604					4	M	0.00289283	0.00361604	0.00361604	0.00433925					4	M	0.00289283
						E46	E	3	20~29	4	Bachelor	3	0.00657462	10			5	FH	0.00328731	0.00394477	0.00460224	0.0052597					4	M	0.00262985	0.00328731	0.00328731	0.00394477					3	FL	0.00131492	0.00197239	0.00262985	0.00328731					6	H	0.00460224
						E47	E	3	20~29	4	Bachelor	3	0.00657462	10			5	FH	0.00328731	0.00394477	0.00460224	0.0052597					5	FH	0.00328731	0.00394477	0.00460224	0.0052597					2	L	0.000657462	0.00131492	0.00131492	0.00197239					2	L	0.000657462
						E48	E	3	10~19	3	Bachelor	3	0.00591716	9			3	FL	0.00118343	0.00177515	0.00236686	0.00295858					3	FL	0.00118343	0.00177515	0.00236686	0.00295858					3	FL	0.00118343	0.00177515	0.00236686	0.00295858					3	FL	0.00118343
						E49	SM	5	GE30	5	Bachelor	3	0.00854701	13			6	H	0.00598291	0.00683761	0.00683761	0.00769231					4	M	0.0034188	0.0042735	0.0042735	0.00512821					1	VL	0	0	0.000854701	0.0017094					2	L	0.000854701
						E50	SM	5	GE30	5	Bachelor	3	0.00854701	13			5	FH	0.0042735	0.00512821	0.00598291	0.00683761					3	FL	0.0017094	0.0025641	0.0034188	0.0042735					3	FL	0.0017094	0.0025641	0.0034188	0.0042735					3	FL	0.0017094
						E51	SM	5	20~29	4	Master	4	0.00854701	13			2	L	0.000854701	0.0017094	0.0017094	0.0025641					1	VL	0	0	0.000854701	0.0017094					3	FL	0.0017094	0.0025641	0.0034188	0.0042735					1	VL	0
						E52	T	2	10~19	3	Master	4	0.00591716	9			4	M	0.00236686	0.00295858	0.00295858	0.0035503					1	VL	0	0	0.000591716	0.00118343					2	L	0.000591716	0.00118343	0.00118343	0.00177515					2	L	0.000591716
						E53	SM	5	10~19	3	PhD	5	0.00854701	13			5	FH	0.0042735	0.00512821	0.00598291	0.00683761					3	FL	0.0017094	0.0025641	0.0034188	0.0042735					3	FL	0.0017094	0.0025641	0.0034188	0.0042735					2	L	0.000854701
						E54	JM	4	20~29	4	Bachelor	3	0.00723208	11			7	VH	0.00578567	0.00650888	0.00723208	0.00723208					4	M	0.00289283	0.00361604	0.00361604	0.00433925					2	L	0.000723208	0.00144642	0.00144642	0.00216963					3	FL	0.00144642
						E55	SM	5	20~29	4	Master	4	0.00854701	13			1	VL	0	0	0.000854701	0.0017094					1	VL	0	0	0.000854701	0.0017094					2	L	0.000854701	0.0017094	0.0017094	0.0025641					2	L	0.000854701
						E56	JM	4	20~29	4	Master	4	0.00788955	12			2	L	0.000788955	0.00157791	0.00157791	0.00236686					1	VL	0	0	0.000788955	0.00157791					1	VL	0	0	0.000788955	0.00157791					2	L	0.000788955
						E57	E	3	10~19	3	Master	4	0.00657462	10			3	FL	0.00131492	0.00197239	0.00262985	0.00328731					2	L	0.000657462	0.00131492	0.00131492	0.00197239					5	FH	0.00328731	0.00394477	0.00460224	0.0052597					5	FH	0.00328731
						E58	SM	5	20~29	4	Master	4	0.00854701	13			6	H	0.00598291	0.00683761	0.00683761	0.00769231					1	VL	0	0	0.000854701	0.0017094					1	VL	0	0	0.000854701	0.0017094					1	VL	0
						E59	JM	4	20~29	4	Master	4	0.00788955	12			6	H	0.00552268	0.00631164	0.00631164	0.00710059					5	FH	0.00394477	0.00473373	0.00552268	0.00631164					6	H	0.00552268	0.00631164	0.00631164	0.00710059					4	M	0.00315582
						E60	JM	4	10~19	3	Bachelor	3	0.00657462	10			3	FL	0.00131492	0.00197239	0.00262985	0.00328731					2	L	0.000657462	0.00131492	0.00131492	0.00197239					2	L	0.000657462	0.00131492	0.00131492	0.00197239					1	VL	0
						E61	SM	5	20~29	4	Master	4	0.00854701	13			5	FH	0.0042735	0.00512821	0.00598291	0.00683761					4	M	0.0034188	0.0042735	0.0042735	0.00512821					5	FH	0.0042735	0.00512821	0.00598291	0.00683761					5	FH	0.0042735
						E62	SM	5	20~29	4	Bachelor	3	0.00788955	12			4	M	0.00315582	0.00394477	0.00394477	0.00473373					4	M	0.00315582	0.00394477	0.00394477	0.00473373					4	M	0.00315582	0.00394477	0.00394477	0.00473373					4	M	0.00315582
						E63	SM	5	GE30	5	Master	4	0.00920447	14			2	L	0.000920447	0.00184089	0.00184089	0.00276134					2	L	0.000920447	0.00184089	0.00184089	0.00276134					2	L	0.000920447	0.00184089	0.00184089	0.00276134					3	FL	0.00184089
						E64	JM	4	10~19	3	Master	4	0.00723208	11			2	L	0.000723208	0.00144642	0.00144642	0.00216963					2	L	0.000723208	0.00144642	0.00144642	0.00216963					2	L	0.000723208	0.00144642	0.00144642	0.00216963					2	L	0.000723208
						E65	JM	4	10~19	3	Bachelor	3	0.00657462	10			3	FL	0.00131492	0.00197239	0.00262985	0.00328731					3	FL	0.00131492	0.00197239	0.00262985	0.00328731					2	L	0.000657462	0.00131492	0.00131492	0.00197239					2	L	0.000657462
						E66	T	2	GE30	5	VE	2	0.00591716	9			4	M	0.00236686	0.00295858	0.00295858	0.0035503					1	VL	0	0	0.000591716	0.00118343					2	L	0.000591716	0.00118343	0.00118343	0.00177515					2	L	0.000591716
						E67	E	3	GE30	5	Master	4	0.00788955	12			1	VL	0	0	0.000788955	0.00157791					1	VL	0	0	0.000788955	0.00157791					1	VL	0	0	0.000788955	0.00157791					1	VL	0
						E68	JM	4	GE30	5	Master	4	0.00854701	13			6	H	0.00598291	0.00683761	0.00683761	0.00769231					5	FH	0.0042735	0.00512821	0.00598291	0.00683761					7	VH	0.00683761	0.00769231	0.00854701	0.00854701					6	H	0.00598291
						E69	E	3	20~29	4	Bachelor	3	0.00657462	10			5	FH	0.00328731	0.00394477	0.00460224	0.0052597					4	M	0.00262985	0.00328731	0.00328731	0.00394477					5	FH	0.00328731	0.00394477	0.00460224	0.0052597					4	M	0.00262985
						E70	JM	4	10~19	3	Master	4	0.00723208	11			4	M	0.00289283	0.00361604	0.00361604	0.00433925					4	M	0.00289283	0.00361604	0.00361604	0.00433925					4	M	0.00289283	0.00361604	0.00361604	0.00433925					4	M	0.00289283
						E71	SM	5	GE30	5	Bachelor	3	0.00854701	13			7	VH	0.00683761	0.00769231	0.00854701	0.00854701					3	FL	0.0017094	0.0025641	0.0034188	0.0042735					3	FL	0.0017094	0.0025641	0.0034188	0.0042735					3	FL	0.0017094
						E72	JM	4	20~29	4	Bachelor	3	0.00723208	11			2	L	0.000723208	0.00144642	0.00144642	0.00216963					2	L	0.000723208	0.00144642	0.00144642	0.00216963					4	M	0.00289283	0.00361604	0.00361604	0.00433925					5	FH	0.00361604
						E73	SM	5	10~19	3	Master	4	0.00788955	12			5	FH	0.00394477	0.00473373	0.00552268	0.00631164					3	FL	0.00157791	0.00236686	0.00315582	0.00394477					2	L	0.000788955	0.00157791	0.00157791	0.00236686					2	L	0.000788955
						E74	SM	5	20~29	4	Master	4	0.00854701	13			2	L	0.000854701	0.0017094	0.0017094	0.0025641					2	L	0.000854701	0.0017094	0.0017094	0.0025641					3	FL	0.0017094	0.0025641	0.0034188	0.0042735					2	L	0.000854701
						E75	E	3	10~19	3	Master	4	0.00657462	10			7	VH	0.0052597	0.00591716	0.00657462	0.00657462					1	VL	0	0	0.000657462	0.00131492					4	M	0.00262985	0.00328731	0.00328731	0.00394477					4	M	0.00262985
						E76	SM	5	20~29	4	Master	4	0.00854701	13			1	VL	0	0	0.000854701	0.0017094					1	VL	0	0	0.000854701	0.0017094					2	L	0.000854701	0.0017094	0.0017094	0.0025641					2	L	0.000854701
						E77	SM	5	6~9	2	Master	4	0.00723208	11			5	FH	0.00361604	0.00433925	0.00506246	0.00578567					6	H	0.00506246	0.00578567	0.00578567	0.00650888					6	H	0.00506246	0.00578567	0.00578567	0.00650888					5	FH	0.00361604
						E78	T	2	10~19	3	Bachelor	3	0.0052597	8			1	VL	0	0	0.00052597	0.00105194					2	L	0.00052597	0.00105194	0.00105194	0.00157791					2	L	0.00052597	0.00105194	0.00105194	0.00157791					2	L	0.00052597
						E79	SM	5	10~19	3	VE	2	0.00657462	10			2	L	0.000657462	0.00131492	0.00131492	0.00197239					3	FL	0.00131492	0.00197239	0.00262985	0.00328731					2	L	0.000657462	0.00131492	0.00131492	0.00197239					1	VL	0
						E80	JM	4	GE30	5	Bachelor	3	0.00788955	12			3	FL	0.00157791	0.00236686	0.00315582	0.00394477					3	FL	0.00157791	0.00236686	0.00315582	0.00394477					1	VL	0	0	0.000788955	0.00157791					2	L	0.000788955
						E81	E	3	10~19	3	PhD	5	0.00723208	11			2	L	0.000723208	0.00144642	0.00144642	0.00216963					3	FL	0.00144642	0.00216963	0.00289283	0.00361604					4	M	0.00289283	0.00361604	0.00361604	0.00433925					1	VL	0
						E82	JM	4	10~19	3	Bachelor	3	0.00657462	10			4	M	0.00262985	0.00328731	0.00328731	0.00394477					4	M	0.00262985	0.00328731	0.00328731	0.00394477					3	FL	0.00131492	0.00197239	0.00262985	0.00328731					3	FL	0.00131492
						E83	SM	5	20~29	4	PhD	5	0.00920447	14			6	H	0.00644313	0.00736358	0.00736358	0.00828402					6	H	0.00644313	0.00736358	0.00736358	0.00828402					5	FH	0.00460224	0.00552268	0.00644313	0.00736358					6	H	0.00644313
						E84	SM	5	10~19	3	Master	4	0.00788955	12			3	FL	0.00157791	0.00236686	0.00315582	0.00394477					3	FL	0.00157791	0.00236686	0.00315582	0.00394477					3	FL	0.00157791	0.00236686	0.00315582	0.00394477					3	FL	0.00157791
						E85	JM	4	6~9	2	Bachelor	3	0.00591716	9			2	L	0.000591716	0.00118343	0.00118343	0.00177515					1	VL	0	0	0.000591716	0.00118343					1	VL	0	0	0.000591716	0.00118343					1	VL	0
						E86	SM	5	10~19	3	Master	4	0.00788955	12			4	M	0.00315582	0.00394477	0.00394477	0.00473373					2	L	0.000788955	0.00157791	0.00157791	0.00236686					2	L	0.000788955	0.00157791	0.00157791	0.00236686					3	FL	0.00157791
						E87	E	3	10~19	3	Bachelor	3	0.00591716	9			5	FH	0.00295858	0.0035503	0.00414201	0.00473373					3	FL	0.00118343	0.00177515	0.00236686	0.00295858					1	VL	0	0	0.000591716	0.00118343					2	L	0.000591716
						E88	SM	5	10~19	3	Master	4	0.00788955	12			4	M	0.00315582	0.00394477	0.00394477	0.00473373					2	L	0.000788955	0.00157791	0.00157791	0.00236686					3	FL	0.00157791	0.00236686	0.00315582	0.00394477					3	FL	0.00157791
						E89	SM	5	20~29	4	PhD	5	0.00920447	14			3	FL	0.00184089	0.00276134	0.00368179	0.00460224					3	FL	0.00184089	0.00276134	0.00368179	0.00460224					2	L	0.000920447	0.00184089	0.00184089	0.00276134					2	L	0.000920447
						E90	E	3	GE30	5	Bachelor	3	0.00723208	11			1	VL	0	0	0.000723208	0.00144642					1	VL	0	0	0.000723208	0.00144642					2	L	0.000723208	0.00144642	0.00144642	0.00216963					3	FL	0.00144642
						E91	E	3	10~19	3	Master	4	0.00657462	10			4	M	0.00262985	0.00328731	0.00328731	0.00394477					3	FL	0.00131492	0.00197239	0.00262985	0.00328731					3	FL	0.00131492	0.00197239	0.00262985	0.00328731					3	FL	0.00131492
						E92	E	3	GE30	5	Bachelor	3	0.00723208	11			7	VH	0.00578567	0.00650888	0.00723208	0.00723208					2	L	0.000723208	0.00144642	0.00144642	0.00216963					2	L	0.000723208	0.00144642	0.00144642	0.00216963					2	L	0.000723208
						E93	SM	5	GE30	5	Master	4	0.00920447	14			2	L	0.000920447	0.00184089	0.00184089	0.00276134					2	L	0.000920447	0.00184089	0.00184089	0.00276134					1	VL	0	0	0.000920447	0.00184089					1	VL	0
						E94	SM	5	20~29	4	Master	4	0.00854701	13			5	FH	0.0042735	0.00512821	0.00598291	0.00683761					3	FL	0.0017094	0.0025641	0.0034188	0.0042735					2	L	0.000854701	0.0017094	0.0017094	0.0025641					2	L	0.000854701
						E95	SM	5	10~19	3	Bachelor	3	0.00723208	11			3	FL	0.00144642	0.00216963	0.00289283	0.00361604					3	FL	0.00144642	0.00216963	0.00289283	0.00361604					4	M	0.00289283	0.00361604	0.00361604	0.00433925					3	FL	0.00144642
						E96	JM	4	20~29	4	Bachelor	3	0.00723208	11			3	FL	0.00144642	0.00216963	0.00289283	0.00361604					2	L	0.000723208	0.00144642	0.00144642	0.00216963					2	L	0.000723208	0.00144642	0.00144642	0.00216963					3	FL	0.00144642
						E97	SM	5	GE30	5	Bachelor	3	0.00854701	13			5	FH	0.0042735	0.00512821	0.00598291	0.00683761					5	FH	0.0042735	0.00512821	0.00598291	0.00683761					6	H	0.00598291	0.00683761	0.00683761	0.00769231					4	M	0.0034188
						E98	JM	4	GE30	5	Master	4	0.00854701	13			6	H	0.00598291	0.00683761	0.00683761	0.00769231					3	FL	0.0017094	0.0025641	0.0034188	0.0042735					3	FL	0.0017094	0.0025641	0.0034188	0.0042735					4	M	0.0034188
						E99	E	3	6~9	2	Bachelor	3	0.0052597	8			5	FH	0.00262985	0.00315582	0.00368179	0.00420776					5	FH	0.00262985	0.00315582	0.00368179	0.00420776					5	FH	0.00262985	0.00315582	0.00368179	0.00420776					5	FH	0.00262985
						E100	E	3	10~19	3	Bachelor	3	0.00591716	9			5	FH	0.00295858	0.0035503	0.00414201	0.00473373					1	VL	0	0	0.000591716	0.00118343					3	FL	0.00118343	0.00177515	0.00236686	0.00295858					1	VL	0
						E101	SM	5	10~19	3	Bachelor	3	0.00723208	11			7	VH	0.00578567	0.00650888	0.00723208	0.00723208					3	FL	0.00144642	0.00216963	0.00289283	0.00361604					2	L	0.000723208	0.00144642	0.00144642	0.00216963					1	VL	0
						E102	SM	5	20~29	4	PhD	5	0.00920447	14			3	FL	0.00184089	0.00276134	0.00368179	0.00460224					3	FL	0.00184089	0.00276134	0.00368179	0.00460224					3	FL	0.00184089	0.00276134	0.00368179	0.00460224					3	FL	0.00184089
						E103	SM	5	10~19	3	Bachelor	3	0.00723208	11			1	VL	0	0	0.000723208	0.00144642					2	L	0.000723208	0.00144642	0.00144642	0.00216963					1	VL	0	0	0.000723208	0.00144642					2	L	0.000723208
						E104	SM	5	20~29	4	Bachelor	3	0.00788955	12			6	H	0.00552268	0.00631164	0.00631164	0.00710059					6	H	0.00552268	0.00631164	0.00631164	0.00710059					5	FH	0.00394477	0.00473373	0.00552268	0.00631164					4	M	0.00315582
						E105	E	3	10~19	3	Bachelor	3	0.00591716	9			7	VH	0.00473373	0.00532544	0.00591716	0.00591716					4	M	0.00236686	0.00295858	0.00295858	0.0035503					3	FL	0.00118343	0.00177515	0.00236686	0.00295858					4	M	0.00236686
						E106	SM	5	10~19	3	Bachelor	3	0.00723208	11			5	FH	0.00361604	0.00433925	0.00506246	0.00578567					2	L	0.000723208	0.00144642	0.00144642	0.00216963					4	M	0.00289283	0.00361604	0.00361604	0.00433925					4	M	0.00289283
						E107	E	3	20~29	4	Master	4	0.00723208	11			2	L	0.000723208	0.00144642	0.00144642	0.00216963					2	L	0.000723208	0.00144642	0.00144642	0.00216963					2	L	0.000723208	0.00144642	0.00144642	0.00216963					2	L	0.000723208
						E108	JM	4	10~19	3	Master	4	0.00723208	11			3	FL	0.00144642	0.00216963	0.00289283	0.00361604					3	FL	0.00144642	0.00216963	0.00289283	0.00361604					3	FL	0.00144642	0.00216963	0.00289283	0.00361604					5	FH	0.00361604
						E109	E	3	20~29	4	Bachelor	3	0.00657462	10			2	L	0.000657462	0.00131492	0.00131492	0.00197239					1	VL	0	0	0.000657462	0.00131492					1	VL	0	0	0.000657462	0.00131492					1	VL	0
						E110	T	2	10~19	3	Bachelor	3	0.0052597	8			1	VL	0	0	0.00052597	0.00105194					1	VL	0	0	0.00052597	0.00105194					1	VL	0	0	0.00052597	0.00105194					1	VL	0
						E111	SM	5	GE30	5	Master	4	0.00920447	14			5	FH	0.00460224	0.00552268	0.00644313	0.00736358					3	FL	0.00184089	0.00276134	0.00368179	0.00460224					3	FL	0.00184089	0.00276134	0.00368179	0.00460224					5	FH	0.00460224
						E112	JM	4	10~19	3	Master	4	0.00723208	11			5	FH	0.00361604	0.00433925	0.00506246	0.00578567					6	H	0.00506246	0.00578567	0.00578567	0.00650888					5	FH	0.00361604	0.00433925	0.00506246	0.00578567					5	FH	0.00361604
						E113	SM	5	10~19	3	Master	4	0.00788955	12			5	FH	0.00394477	0.00473373	0.00552268	0.00631164					2	L	0.000788955	0.00157791	0.00157791	0.00236686					2	L	0.000788955	0.00157791	0.00157791	0.00236686					2	L	0.000788955
						E114	T	2	20~29	4	Master	4	0.00657462	10			2	L	0.000657462	0.00131492	0.00131492	0.00197239					1	VL	0	0	0.000657462	0.00131492					3	FL	0.00131492	0.00197239	0.00262985	0.00328731					3	FL	0.00131492
						E115	SM	5	10~19	3	Master	4	0.00788955	12			3	FL	0.00157791	0.00236686	0.00315582	0.00394477					3	FL	0.00157791	0.00236686	0.00315582	0.00394477					5	FH	0.00394477	0.00473373	0.00552268	0.00631164					5	FH	0.00394477
						E116	SM	5	20~29	4	Master	4	0.00854701	13			3	FL	0.0017094	0.0025641	0.0034188	0.0042735					2	L	0.000854701	0.0017094	0.0017094	0.0025641					1	VL	0	0	0.000854701	0.0017094					1	VL	0
						E117	SM	5	20~29	4	Master	4	0.00854701	13			3	FL	0.0017094	0.0025641	0.0034188	0.0042735					2	L	0.000854701	0.0017094	0.0017094	0.0025641					1	VL	0	0	0.000854701	0.0017094					1	VL	0
						E118	JM	4	10~19	3	Master	4	0.00723208	11			4	M	0.00289283	0.00361604	0.00361604	0.00433925					2	L	0.000723208	0.00144642	0.00144642	0.00216963					2	L	0.000723208	0.00144642	0.00144642	0.00216963					2	L	0.000723208
						E119	T	2	20~29	4	Bachelor	3	0.00591716	9			4	M	0.00236686	0.00295858	0.00295858	0.0035503					2	L	0.000591716	0.00118343	0.00118343	0.00177515					3	FL	0.00118343	0.00177515	0.00236686	0.00295858					2	L	0.000591716
						E120	E	3	GE30	5	Master	4	0.00788955	12			4	M	0.00315582	0.00394477	0.00394477	0.00473373					1	VL	0	0	0.000788955	0.00157791					4	M	0.00315582	0.00394477	0.00394477	0.00473373					5	FH	0.00394477
						E121	JM	4	10~19	3	Master	4	0.00723208	11			4	M	0.00289283	0.00361604	0.00361604	0.00433925					4	M	0.00289283	0.00361604	0.00361604	0.00433925					4	M	0.00289283	0.00361604	0.00361604	0.00433925					4	M	0.00289283
						E122	SM	5	GE30	5	Bachelor	3	0.00854701	13			7	VH	0.00683761	0.00769231	0.00854701	0.00854701					3	FL	0.0017094	0.0025641	0.0034188	0.0042735					3	FL	0.0017094	0.0025641	0.0034188	0.0042735					2	L	0.000854701
						E123	SM	5	20~29	4	Master	4	0.00854701	13			6	H	0.00598291	0.00683761	0.00683761	0.00769231					3	FL	0.0017094	0.0025641	0.0034188	0.0042735					2	L	0.000854701	0.0017094	0.0017094	0.0025641					2	L	0.000854701
						E124	SM	5	GE30	5	Bachelor	3	0.00854701	13			3	FL	0.0017094	0.0025641	0.0034188	0.0042735					3	FL	0.0017094	0.0025641	0.0034188	0.0042735					3	FL	0.0017094	0.0025641	0.0034188	0.0042735					4	M	0.0034188
						E125	E	3	20~29	4	PhD	5	0.00788955	12			2	L	0.000788955	0.00157791	0.00157791	0.00236686					2	L	0.000788955	0.00157791	0.00157791	0.00236686					3	FL	0.00157791	0.00236686	0.00315582	0.00394477					3	FL	0.00157791
						E126	SM	5	10~19	3	PhD	5	0.00854701	13			7	VH	0.00683761	0.00769231	0.00854701	0.00854701					4	M	0.0034188	0.0042735	0.0042735	0.00512821					3	FL	0.0017094	0.0025641	0.0034188	0.0042735					6	H	0.00598291
						E127	E	3	10~19	3	Bachelor	3	0.00591716	9			2	L	0.000591716	0.00118343	0.00118343	0.00177515					1	VL	0	0	0.000591716	0.00118343					1	VL	0	0	0.000591716	0.00118343					1	VL	0
						E128	T	2	GE30	5	Bachelor	3	0.00657462	10			1	VL	0	0	0.000657462	0.00131492					2	L	0.000657462	0.00131492	0.00131492	0.00197239					2	L	0.000657462	0.00131492	0.00131492	0.00197239					3	FL	0.00131492
						E129	SM	5	10~19	3	Bachelor	3	0.00723208	11			5	FH	0.00361604	0.00433925	0.00506246	0.00578567					5	FH	0.00361604	0.00433925	0.00506246	0.00578567					5	FH	0.00361604	0.00433925	0.00506246	0.00578567					5	FH	0.00361604
						E130	JM	4	GE30	5	Master	4	0.00854701	13			4	M	0.0034188	0.0042735	0.0042735	0.00512821					4	M	0.0034188	0.0042735	0.0042735	0.00512821					5	FH	0.0042735	0.00512821	0.00598291	0.00683761					2	L	0.000854701
						E131	SM	5	10~19	3	Master	4	0.00788955	12			7	VH	0.00631164	0.00710059	0.00788955	0.00788955					7	VH	0.00631164	0.00710059	0.00788955	0.00788955					3	FL	0.00157791	0.00236686	0.00315582	0.00394477					3	FL	0.00157791
						E132	SM	5	10~19	3	Master	4	0.00788955	12			4	M	0.00315582	0.00394477	0.00394477	0.00473373					2	L	0.000788955	0.00157791	0.00157791	0.00236686					2	L	0.000788955	0.00157791	0.00157791	0.00236686					2	L	0.000788955
						E133	SM	5	GE30	5	Bachelor	3	0.00854701	13			2	L	0.000854701	0.0017094	0.0017094	0.0025641					7	VH	0.00683761	0.00769231	0.00854701	0.00854701					5	FH	0.0042735	0.00512821	0.00598291	0.00683761					3	FL	0.0017094
						E134	E	3	10~19	3	Bachelor	3	0.00591716	9			4	M	0.00236686	0.00295858	0.00295858	0.0035503					2	L	0.000591716	0.00118343	0.00118343	0.00177515					2	L	0.000591716	0.00118343	0.00118343	0.00177515					2	L	0.000591716
						E135	SM	5	GE30	5	Master	4	0.00920447	14			4	M	0.00368179	0.00460224	0.00460224	0.00552268					3	FL	0.00184089	0.00276134	0.00368179	0.00460224					2	L	0.000920447	0.00184089	0.00184089	0.00276134					1	VL	0
						E136	SM	5	10~19	3	Master	4	0.00788955	12			4	M	0.00315582	0.00394477	0.00394477	0.00473373					5	FH	0.00394477	0.00473373	0.00552268	0.00631164					3	FL	0.00157791	0.00236686	0.00315582	0.00394477					4	M	0.00315582
						E137	SM	5	20~29	4	Master	4	0.00854701	13			7	VH	0.00683761	0.00769231	0.00854701	0.00854701					5	FH	0.0042735	0.00512821	0.00598291	0.00683761					1	VL	0	0	0.000854701	0.0017094					1	VL	0
													1						0.351611	0.440237	0.49645	0.587508	0.469076	2.39798	0.00399959				0.237344	0.319527	0.377318	0.475082	0.353108	2.81552	0.00152927				0.214464	0.298356	0.353912	0.453057	0.330738	2.91041	0.00122912				0.216963
[truncated: 132 more columns]

## Sheet: BE19
																	BE19
																	Possibility of containers dropping during cargo operation.
Expression	a	b	c	d		Expert ID	PP	PPS	ST	STS	EL	ELS	Wi	SUM Ei	SUM		Expression No.	Expression	a	b	c	d	FP	C	OR
VL	0	0	0.1	0.2		E1	JM	4	10~19	3	Bachelor	3	0.00701262	10	1426		1	VL	0	0	0.000701262	0.00140252
L	0.1	0.2	0.2	0.3		E2	E	3	20~29	4	Bachelor	3	0.00701262	10			5	FH	0.00350631	0.00420757	0.00490884	0.0056101
FL	0.2	0.3	0.4	0.5		E3	E	3	10~19	3	Master	4	0.00701262	10			1	VL	0	0	0.000701262	0.00140252
M	0.4	0.5	0.5	0.6		E4	E	3	10~19	3	Master	4	0.00701262	10			4	M	0.00280505	0.00350631	0.00350631	0.00420757
FH	0.5	0.6	0.7	0.8		E5	E	3	10~19	3	Master	4	0.00701262	10			4	M	0.00280505	0.00350631	0.00350631	0.00420757
H	0.7	0.8	0.8	0.9		E6	E	3	20~29	4	Bachelor	3	0.00701262	10			2	L	0.000701262	0.00140252	0.00140252	0.00210379
VH	0.8	0.9	1	1		E7	SM	5	20~29	4	Bachelor	3	0.00841515	12			4	M	0.00336606	0.00420757	0.00420757	0.00504909
						E8	T	2	20~29	4	Bachelor	3	0.00631136	9			2	L	0.000631136	0.00126227	0.00126227	0.00189341
						E9	E	3	10~19	3	Master	4	0.00701262	10			5	FH	0.00350631	0.00420757	0.00490884	0.0056101
						E10	T	2	GE30	5	PhD	5	0.00841515	12			2	L	0.000841515	0.00168303	0.00168303	0.00252454
						E11	T	2	10~19	3	Master	4	0.00631136	9			2	L	0.000631136	0.00126227	0.00126227	0.00189341
						E12	E	3	GE30	5	Master	4	0.00841515	12			2	L	0.000841515	0.00168303	0.00168303	0.00252454
						E13	T	2	6~9	2	Bachelor	3	0.00490884	7			3	FL	0.000981767	0.00147265	0.00196353	0.00245442
						E14	JM	4	GE30	5	Bachelor	3	0.00841515	12			3	FL	0.00168303	0.00252454	0.00336606	0.00420757
						E15	T	2	20~29	4	PhD	5	0.00771388	11			7	VH	0.00617111	0.0069425	0.00771388	0.00771388
						E16	SM	5	6~9	2	PhD	5	0.00841515	12			3	FL	0.00168303	0.00252454	0.00336606	0.00420757
						E17	SM	5	10~19	3	Bachelor	3	0.00771388	11			4	M	0.00308555	0.00385694	0.00385694	0.00462833
						E18	JM	4	10~19	3	Bachelor	3	0.00701262	10			3	FL	0.00140252	0.00210379	0.00280505	0.00350631
						E19	SM	5	20~29	4	Bachelor	3	0.00841515	12			4	M	0.00336606	0.00420757	0.00420757	0.00504909
						E20	JM	4	GE30	5	Bachelor	3	0.00841515	12			6	H	0.0058906	0.00673212	0.00673212	0.00757363
						E21	E	3	10~19	3	Bachelor	3	0.00631136	9			6	H	0.00441795	0.00504909	0.00504909	0.00568022
						E22	E	3	LE5	1	PhD	5	0.00631136	9			2	L	0.000631136	0.00126227	0.00126227	0.00189341
						E23	T	2	20~29	4	PhD	5	0.00771388	11			2	L	0.000771388	0.00154278	0.00154278	0.00231417
						E24	T	2	6~9	2	Master	4	0.0056101	8			1	VL	0	0	0.00056101	0.00112202
						E25	SM	5	GE30	5	Bachelor	3	0.00911641	13			2	L	0.000911641	0.00182328	0.00182328	0.00273492
						E26	JM	4	20~29	4	Bachelor	3	0.00771388	11			1	VL	0	0	0.000771388	0.00154278
						E27	SM	5	GE30	5	Bachelor	3	0.00911641	13			2	L	0.000911641	0.00182328	0.00182328	0.00273492
						E28	E	3	GE30	5	Master	4	0.00841515	12			3	FL	0.00168303	0.00252454	0.00336606	0.00420757
						E29	SM	5	10~19	3	Master	4	0.00841515	12			1	VL	0	0	0.000841515	0.00168303
						E30	T	2	GE30	5	PhD	5	0.00841515	12			1	VL	0	0	0.000841515	0.00168303
						E31	SM	5	20~29	4	VE	2	0.00771388	11			2	L	0.000771388	0.00154278	0.00154278	0.00231417
						E32	E	3	10~19	3	PhD	5	0.00771388	11			3	FL	0.00154278	0.00231417	0.00308555	0.00385694
						E33	T	2	10~19	3	Master	4	0.00631136	9			5	FH	0.00315568	0.00378682	0.00441795	0.00504909
						E34	SM	5	20~29	4	Master	4	0.00911641	13			2	L	0.000911641	0.00182328	0.00182328	0.00273492
						E35	W	1	10~19	3	Bachelor	3	0	0
						E36	SM	5	20~29	4	Master	4	0.00911641	13			1	VL	0	0	0.000911641	0.00182328
						E37	T	2	10~19	3	Bachelor	3	0.0056101	8			1	VL	0	0	0.00056101	0.00112202
						E38	E	3	LE5	1	Master	4	0	0
						E39	E	3	LE5	1	Master	4	0.0056101	8			5	FH	0.00280505	0.00336606	0.00392707	0.00448808
						E40	E	3	10~19	3	Bachelor	3	0.00631136	9			5	FH	0.00315568	0.00378682	0.00441795	0.00504909
						E41	T	2	6~9	2	Master	4	0.0056101	8			3	FL	0.00112202	0.00168303	0.00224404	0.00280505
						E42	JM	4	10~19	3	Bachelor	3	0.00701262	10			3	FL	0.00140252	0.00210379	0.00280505	0.00350631
						E43	E	3	6~9	2	Master	4	0.00631136	9			5	FH	0.00315568	0.00378682	0.00441795	0.00504909
						E44	JM	4	10~19	3	Master	4	0.00771388	11			2	L	0.000771388	0.00154278	0.00154278	0.00231417
						E45	JM	4	10~19	3	Master	4	0.00771388	11			3	FL	0.00154278	0.00231417	0.00308555	0.00385694
						E46	E	3	20~29	4	Bachelor	3	0.00701262	10			5	FH	0.00350631	0.00420757	0.00490884	0.0056101
						E47	E	3	20~29	4	Bachelor	3	0.00701262	10			2	L	0.000701262	0.00140252	0.00140252	0.00210379
						E48	E	3	10~19	3	Bachelor	3	0.00631136	9			3	FL	0.00126227	0.00189341	0.00252454	0.00315568
						E49	SM	5	GE30	5	Bachelor	3	0.00911641	13			2	L	0.000911641	0.00182328	0.00182328	0.00273492
						E50	SM	5	GE30	5	Bachelor	3	0	0
						E51	SM	5	20~29	4	Master	4	0.00911641	13			3	FL	0.00182328	0.00273492	0.00364656	0.0045582
						E52	T	2	10~19	3	Master	4	0.00631136	9			3	FL	0.00126227	0.00189341	0.00252454	0.00315568
						E53	SM	5	10~19	3	PhD	5	0.00911641	13			1	VL	0	0	0.000911641	0.00182328
						E54	JM	4	20~29	4	Bachelor	3	0.00771388	11			3	FL	0.00154278	0.00231417	0.00308555	0.00385694
						E55	SM	5	20~29	4	Master	4	0	0
						E56	JM	4	20~29	4	Master	4	0.00841515	12			2	L	0.000841515	0.00168303	0.00168303	0.00252454
						E57	E	3	10~19	3	Master	4	0.00701262	10			2	L	0.000701262	0.00140252	0.00140252	0.00210379
						E58	SM	5	20~29	4	Master	4	0.00911641	13			2	L	0.000911641	0.00182328	0.00182328	0.00273492
						E59	JM	4	20~29	4	Master	4	0.00841515	12			3	FL	0.00168303	0.00252454	0.00336606	0.00420757
						E60	JM	4	10~19	3	Bachelor	3	0.00701262	10			2	L	0.000701262	0.00140252	0.00140252	0.00210379
						E61	SM	5	20~29	4	Master	4	0.00911641	13			5	FH	0.0045582	0.00546985	0.00638149	0.00729313
						E62	SM	5	20~29	4	Bachelor	3	0.00841515	12			4	M	0.00336606	0.00420757	0.00420757	0.00504909
						E63	SM	5	GE30	5	Master	4	0.00981767	14			3	FL	0.00196353	0.0029453	0.00392707	0.00490884
						E64	JM	4	10~19	3	Master	4	0.00771388	11			3	FL	0.00154278	0.00231417	0.00308555	0.00385694
						E65	JM	4	10~19	3	Bachelor	3	0.00701262	10			1	VL	0	0	0.000701262	0.00140252
						E66	T	2	GE30	5	VE	2	0	0
						E67	E	3	GE30	5	Master	4	0.00841515	12			2	L	0.000841515	0.00168303	0.00168303	0.00252454
						E68	JM	4	GE30	5	Master	4	0.00911641	13			4	M	0.00364656	0.0045582	0.0045582	0.00546985
						E69	E	3	20~29	4	Bachelor	3	0.00701262	10			3	FL	0.00140252	0.00210379	0.00280505	0.00350631
						E70	JM	4	10~19	3	Master	4	0.00771388	11			2	L	0.000771388	0.00154278	0.00154278	0.00231417
						E71	SM	5	GE30	5	Bachelor	3	0.00911641	13			3	FL	0.00182328	0.00273492	0.00364656	0.0045582
						E72	JM	4	20~29	4	Bachelor	3	0.00771388	11			3	FL	0.00154278	0.00231417	0.00308555	0.00385694
						E73	SM	5	10~19	3	Master	4	0.00841515	12			3	FL	0.00168303	0.00252454	0.00336606	0.00420757
						E74	SM	5	20~29	4	Master	4	0.00911641	13			3	FL	0.00182328	0.00273492	0.00364656	0.0045582
						E75	E	3	10~19	3	Master	4	0.00701262	10			5	FH	0.00350631	0.00420757	0.00490884	0.0056101
						E76	SM	5	20~29	4	Master	4	0.00911641	13			1	VL	0	0	0.000911641	0.00182328
						E77	SM	5	6~9	2	Master	4	0.00771388	11			4	M	0.00308555	0.00385694	0.00385694	0.00462833
						E78	T	2	10~19	3	Bachelor	3	0.0056101	8			2	L	0.00056101	0.00112202	0.00112202	0.00168303
						E79	SM	5	10~19	3	VE	2	0.00701262	10			2	L	0.000701262	0.00140252	0.00140252	0.00210379
						E80	JM	4	GE30	5	Bachelor	3	0	0
						E81	E	3	10~19	3	PhD	5	0.00771388	11			2	L	0.000771388	0.00154278	0.00154278	0.00231417
						E82	JM	4	10~19	3	Bachelor	3	0.00701262	10			2	L	0.000701262	0.00140252	0.00140252	0.00210379
						E83	SM	5	20~29	4	PhD	5	0.00981767	14			5	FH	0.00490884	0.0058906	0.00687237	0.00785414
						E84	SM	5	10~19	3	Master	4	0.00841515	12			5	FH	0.00420757	0.00504909	0.0058906	0.00673212
						E85	JM	4	6~9	2	Bachelor	3	0.00631136	9			3	FL	0.00126227	0.00189341	0.00252454	0.00315568
						E86	SM	5	10~19	3	Master	4	0.00841515	12			5	FH	0.00420757	0.00504909	0.0058906	0.00673212
						E87	E	3	10~19	3	Bachelor	3	0.00631136	9			1	VL	0	0	0.000631136	0.00126227
						E88	SM	5	10~19	3	Master	4	0.00841515	12			1	VL	0	0	0.000841515	0.00168303
						E89	SM	5	20~29	4	PhD	5	0.00981767	14			4	M	0.00392707	0.00490884	0.00490884	0.0058906
						E90	E	3	GE30	5	Bachelor	3	0	0				FALSE
						E91	E	3	10~19	3	Master	4	0.00701262	10			1	VL	0	0	0.000701262	0.00140252
						E92	E	3	GE30	5	Bachelor	3	0.00771388	11			2	L	0.000771388	0.00154278	0.00154278	0.00231417
						E93	SM	5	GE30	5	Master	4	0.00981767	14			1	VL	0	0	0.000981767	0.00196353
						E94	SM	5	20~29	4	Master	4	0.00911641	13			3	FL	0.00182328	0.00273492	0.00364656	0.0045582
						E95	SM	5	10~19	3	Bachelor	3	0.00771388	11			2	L	0.000771388	0.00154278	0.00154278	0.00231417
						E96	JM	4	20~29	4	Bachelor	3	0.00771388	11			5	FH	0.00385694	0.00462833	0.00539972	0.00617111
						E97	SM	5	GE30	5	Bachelor	3	0.00911641	13			4	M	0.00364656	0.0045582	0.0045582	0.00546985
						E98	JM	4	GE30	5	Master	4	0.00911641	13			2	L	0.000911641	0.00182328	0.00182328	0.00273492
						E99	E	3	6~9	2	Bachelor	3	0.0056101	8			5	FH	0.00280505	0.00336606	0.00392707	0.00448808
						E100	E	3	10~19	3	Bachelor	3	0.00631136	9			3	FL	0.00126227	0.00189341	0.00252454	0.00315568
						E101	SM	5	10~19	3	Bachelor	3	0.00771388	11			5	FH	0.00385694	0.00462833	0.00539972	0.00617111
						E102	SM	5	20~29	4	PhD	5	0.00981767	14			5	FH	0.00490884	0.0058906	0.00687237	0.00785414
						E103	SM	5	10~19	3	Bachelor	3	0.00771388	11			2	L	0.000771388	0.00154278	0.00154278	0.00231417
						E104	SM	5	20~29	4	Bachelor	3	0.00841515	12			1	VL	0	0	0.000841515	0.00168303
						E105	E	3	10~19	3	Bachelor	3	0.00631136	9			3	FL	0.00126227	0.00189341	0.00252454	0.00315568
						E106	SM	5	10~19	3	Bachelor	3	0.00771388	11			3	FL	0.00154278	0.00231417	0.00308555	0.00385694
						E107	E	3	20~29	4	Master	4	0	0				FALSE
						E108	JM	4	10~19	3	Master	4	0.00771388	11			4	M	0.00308555	0.00385694	0.00385694	0.00462833
						E109	E	3	20~29	4	Bachelor	3	0.00701262	10			1	VL	0	0	0.000701262	0.00140252
						E110	T	2	10~19	3	Bachelor	3	0.0056101	8			4	M	0.00224404	0.00280505	0.00280505	0.00336606
						E111	SM	5	GE30	5	Master	4	0.00981767	14			4	M	0.00392707	0.00490884	0.00490884	0.0058906
						E112	JM	4	10~19	3	Master	4	0.00771388	11			4	M	0.00308555	0.00385694	0.00385694	0.00462833
						E113	SM	5	10~19	3	Master	4	0.00841515	12			2	L	0.000841515	0.00168303	0.00168303	0.00252454
						E114	T	2	20~29	4	Master	4	0.00701262	10			3	FL	0.00140252	0.00210379	0.00280505	0.00350631
						E115	SM	5	10~19	3	Master	4	0.00841515	12			6	H	0.0058906	0.00673212	0.00673212	0.00757363
						E116	SM	5	20~29	4	Master	4	0.00911641	13			3	FL	0.00182328	0.00273492	0.00364656	0.0045582
						E117	SM	5	20~29	4	Master	4	0.00911641	13			3	FL	0.00182328	0.00273492	0.00364656	0.0045582
						E118	JM	4	10~19	3	Master	4	0	0				FALSE
						E119	T	2	20~29	4	Bachelor	3	0.00631136	9			2	L	0.000631136	0.00126227	0.00126227	0.00189341
						E120	E	3	GE30	5	Master	4	0.00841515	12			6	H	0.0058906	0.00673212	0.00673212	0.00757363
						E121	JM	4	10~19	3	Master	4	0.00771388	11			4	M	0.00308555	0.00385694	0.00385694	0.00462833
						E122	SM	5	GE30	5	Bachelor	3	0.00911641	13			2	L	0.000911641	0.00182328	0.00182328	0.00273492
						E123	SM	5	20~29	4	Master	4	0.00911641	13			2	L	0.000911641	0.00182328	0.00182328	0.00273492
						E124	SM	5	GE30	5	Bachelor	3	0.00911641	13			4	M	0.00364656	0.0045582	0.0045582	0.00546985
						E125	E	3	20~29	4	PhD	5	0.00841515	12			3	FL	0.00168303	0.00252454	0.00336606	0.00420757
						E126	SM	5	10~19	3	PhD	5	0.00911641	13			4	M	0.00364656	0.0045582	0.0045582	0.00546985
						E127	E	3	10~19	3	Bachelor	3	0.00631136	9			3	FL	0.00126227	0.00189341	0.00252454	0.00315568
						E128	T	2	GE30	5	Bachelor	3	0.00701262	10			2	L	0.000701262	0.00140252	0.00140252	0.00210379
						E129	SM	5	10~19	3	Bachelor	3	0.00771388	11			5	FH	0.00385694	0.00462833	0.00539972	0.00617111
						E130	JM	4	GE30	5	Master	4	0.00911641	13			4	M	0.00364656	0.0045582	0.0045582	0.00546985
						E131	SM	5	10~19	3	Master	4	0.00841515	12			4	M	0.00336606	0.00420757	0.00420757	0.00504909
						E132	SM	5	10~19	3	Master	4	0.00841515	12			3	FL	0.00168303	0.00252454	0.00336606	0.00420757
						E133	SM	5	GE30	5	Bachelor	3	0.00911641	13			2	L	0.000911641	0.00182328	0.00182328	0.00273492
						E134	E	3	10~19	3	Bachelor	3	0.00631136	9			4	M	0.00252454	0.00315568	0.00315568	0.00378682
						E135	SM	5	GE30	5	Master	4	0.00981767	14			2	L	0.000981767	0.00196353	0.00196353	0.0029453
						E136	SM	5	10~19	3	Master	4	0.00841515	12			5	FH	0.00420757	0.00504909	0.0058906	0.00673212
						E137	SM	5	20~29	4	Master	4	0.00911641	13			2	L	0.000911641	0.00182328	0.00182328	0.00273492
													1						0.23899	0.325877	0.37791	0.477139	0.355639	2.80515	0.00156619

## Sheet: BE20-21
																	BE20										BE21
																	sparks from dropping containers.										sparks from refrigerated containers (not be intrinsically safe).
Expression	a	b	c	d		Expert ID	PP	PPS	ST	STS	EL	ELS	Wi	SUM Ei	SUM		Expression No.	Expression	a	b	c	d	FP	C	OR		Expression No.	Expression	a	b	c	d	FP	C	OR
VL	0	0	0.1	0.2		E1	JM	4	10~19	3	Bachelor	3	0.00678887	10	1473		7	VH	0.00543109	0.00610998	0.00678887	0.00678887					7	VH	0.00543109	0.00610998	0.00678887	0.00678887
L	0.1	0.2	0.2	0.3		E2	E	3	20~29	4	Bachelor	3	0.00678887	10			5	FH	0.00339443	0.00407332	0.00475221	0.00543109					5	FH	0.00339443	0.00407332	0.00475221	0.00543109
FL	0.2	0.3	0.4	0.5		E3	E	3	10~19	3	Master	4	0.00678887	10			5	FH	0.00339443	0.00407332	0.00475221	0.00543109					2	L	0.000678887	0.00135777	0.00135777	0.00203666
M	0.4	0.5	0.5	0.6		E4	E	3	10~19	3	Master	4	0.00678887	10			6	H	0.00475221	0.00543109	0.00543109	0.00610998					5	FH	0.00339443	0.00407332	0.00475221	0.00543109
FH	0.5	0.6	0.7	0.8		E5	E	3	10~19	3	Master	4	0.00678887	10			7	VH	0.00543109	0.00610998	0.00678887	0.00678887					5	FH	0.00339443	0.00407332	0.00475221	0.00543109
H	0.7	0.8	0.8	0.9		E6	E	3	20~29	4	Bachelor	3	0.00678887	10			6	H	0.00475221	0.00543109	0.00543109	0.00610998					7	VH	0.00543109	0.00610998	0.00678887	0.00678887
VH	0.8	0.9	1	1		E7	SM	5	20~29	4	Bachelor	3	0.00814664	12			6	H	0.00570265	0.00651731	0.00651731	0.00733198					3	FL	0.00162933	0.00244399	0.00325866	0.00407332
						E8	T	2	20~29	4	Bachelor	3	0.00610998	9			4	M	0.00244399	0.00305499	0.00305499	0.00366599					5	FH	0.00305499	0.00366599	0.00427699	0.00488798
						E9	E	3	10~19	3	Master	4	0.00678887	10			7	VH	0.00543109	0.00610998	0.00678887	0.00678887					6	H	0.00475221	0.00543109	0.00543109	0.00610998
						E10	T	2	GE30	5	PhD	5	0.00814664	12			4	M	0.00325866	0.00407332	0.00407332	0.00488798					4	M	0.00325866	0.00407332	0.00407332	0.00488798
						E11	T	2	10~19	3	Master	4	0.00610998	9			2	L	0.000610998	0.001222	0.001222	0.00183299					1	VL	0	0	0.000610998	0.001222
						E12	E	3	GE30	5	Master	4	0.00814664	12			5	FH	0.00407332	0.00488798	0.00570265	0.00651731					5	FH	0.00407332	0.00488798	0.00570265	0.00651731
						E13	T	2	6~9	2	Bachelor	3	0.00475221	7			2	L	0.000475221	0.000950441	0.000950441	0.00142566					5	FH	0.0023761	0.00285132	0.00332654	0.00380177
						E14	JM	4	GE30	5	Bachelor	3	0.00814664	12			6	H	0.00570265	0.00651731	0.00651731	0.00733198					6	H	0.00570265	0.00651731	0.00651731	0.00733198
						E15	T	2	20~29	4	PhD	5	0.00746775	11			4	M	0.0029871	0.00373388	0.00373388	0.00448065					4	M	0.0029871	0.00373388	0.00373388	0.00448065
						E16	SM	5	6~9	2	PhD	5	0.00814664	12			3	FL	0.00162933	0.00244399	0.00325866	0.00407332					3	FL	0.00162933	0.00244399	0.00325866	0.00407332
						E17	SM	5	10~19	3	Bachelor	3	0.00746775	11			4	M	0.0029871	0.00373388	0.00373388	0.00448065					5	FH	0.00373388	0.00448065	0.00522743	0.0059742
						E18	JM	4	10~19	3	Bachelor	3	0.00678887	10			5	FH	0.00339443	0.00407332	0.00475221	0.00543109					3	FL	0.00135777	0.00203666	0.00271555	0.00339443
						E19	SM	5	20~29	4	Bachelor	3	0.00814664	12			7	VH	0.00651731	0.00733198	0.00814664	0.00814664					7	VH	0.00651731	0.00733198	0.00814664	0.00814664
						E20	JM	4	GE30	5	Bachelor	3	0.00814664	12			6	H	0.00570265	0.00651731	0.00651731	0.00733198					5	FH	0.00407332	0.00488798	0.00570265	0.00651731
						E21	E	3	10~19	3	Bachelor	3	0.00610998	9			4	M	0.00244399	0.00305499	0.00305499	0.00366599					6	H	0.00427699	0.00488798	0.00488798	0.00549898
						E22	E	3	LE5	1	PhD	5	0.00610998	9			5	FH	0.00305499	0.00366599	0.00427699	0.00488798					5	FH	0.00305499	0.00366599	0.00427699	0.00488798
						E23	T	2	20~29	4	PhD	5	0.00746775	11			5	FH	0.00373388	0.00448065	0.00522743	0.0059742					6	H	0.00522743	0.0059742	0.0059742	0.00672098
						E24	T	2	6~9	2	Master	4	0.00543109	8			6	H	0.00380177	0.00434487	0.00434487	0.00488798					4	M	0.00217244	0.00271555	0.00271555	0.00325866
						E25	SM	5	GE30	5	Bachelor	3	0.00882553	13			6	H	0.00617787	0.00706042	0.00706042	0.00794297					2	L	0.000882553	0.00176511	0.00176511	0.00264766
						E26	JM	4	20~29	4	Bachelor	3	0.00746775	11			1	VL	0	0	0.000746775	0.00149355					2	L	0.000746775	0.00149355	0.00149355	0.00224033
						E27	SM	5	GE30	5	Bachelor	3	0.00882553	13			2	L	0.000882553	0.00176511	0.00176511	0.00264766					1	VL	0	0	0.000882553	0.00176511
						E28	E	3	GE30	5	Master	4	0.00814664	12			6	H	0.00570265	0.00651731	0.00651731	0.00733198					4	M	0.00325866	0.00407332	0.00407332	0.00488798
						E29	SM	5	10~19	3	Master	4	0.00814664	12			2	L	0.000814664	0.00162933	0.00162933	0.00244399					2	L	0.000814664	0.00162933	0.00162933	0.00244399
						E30	T	2	GE30	5	PhD	5	0.00814664	12			2	L	0.000814664	0.00162933	0.00162933	0.00244399					4	M	0.00325866	0.00407332	0.00407332	0.00488798
						E31	SM	5	20~29	4	VE	2	0.00746775	11			7	VH	0.0059742	0.00672098	0.00746775	0.00746775					4	M	0.0029871	0.00373388	0.00373388	0.00448065
						E32	E	3	10~19	3	PhD	5	0.00746775	11			6	H	0.00522743	0.0059742	0.0059742	0.00672098					6	H	0.00522743	0.0059742	0.0059742	0.00672098
						E33	T	2	10~19	3	Master	4	0.00610998	9			7	VH	0.00488798	0.00549898	0.00610998	0.00610998					7	VH	0.00488798	0.00549898	0.00610998	0.00610998
						E34	SM	5	20~29	4	Master	4	0.00882553	13			2	L	0.000882553	0.00176511	0.00176511	0.00264766					2	L	0.000882553	0.00176511	0.00176511	0.00264766
						E35	W	1	10~19	3	Bachelor	3	0	0
						E36	SM	5	20~29	4	Master	4	0.00882553	13			3	FL	0.00176511	0.00264766	0.00353021	0.00441276					3	FL	0.00176511	0.00264766	0.00353021	0.00441276
						E37	T	2	10~19	3	Bachelor	3	0.00543109	8			1	VL	0	0	0.000543109	0.00108622					2	L	0.000543109	0.00108622	0.00108622	0.00162933
						E38	E	3	LE5	1	Master	4	0	0
						E39	E	3	LE5	1	Master	4	0.00543109	8			5	FH	0.00271555	0.00325866	0.00380177	0.00434487					2	L	0.000543109	0.00108622	0.00108622	0.00162933
						E40	E	3	10~19	3	Bachelor	3	0.00610998	9			6	H	0.00427699	0.00488798	0.00488798	0.00549898					5	FH	0.00305499	0.00366599	0.00427699	0.00488798
						E41	T	2	6~9	2	Master	4	0.00543109	8			4	M	0.00217244	0.00271555	0.00271555	0.00325866					5	FH	0.00271555	0.00325866	0.00380177	0.00434487
						E42	JM	4	10~19	3	Bachelor	3	0.00678887	10			2	L	0.000678887	0.00135777	0.00135777	0.00203666					2	L	0.000678887	0.00135777	0.00135777	0.00203666
						E43	E	3	6~9	2	Master	4	0.00610998	9			3	FL	0.001222	0.00183299	0.00244399	0.00305499					3	FL	0.001222	0.00183299	0.00244399	0.00305499
						E44	JM	4	10~19	3	Master	4	0.00746775	11			5	FH	0.00373388	0.00448065	0.00522743	0.0059742					5	FH	0.00373388	0.00448065	0.00522743	0.0059742
						E45	JM	4	10~19	3	Master	4	0.00746775	11			4	M	0.0029871	0.00373388	0.00373388	0.00448065					4	M	0.0029871	0.00373388	0.00373388	0.00448065
						E46	E	3	20~29	4	Bachelor	3	0.00678887	10			5	FH	0.00339443	0.00407332	0.00475221	0.00543109					5	FH	0.00339443	0.00407332	0.00475221	0.00543109
						E47	E	3	20~29	4	Bachelor	3	0.00678887	10			2	L	0.000678887	0.00135777	0.00135777	0.00203666					3	FL	0.00135777	0.00203666	0.00271555	0.00339443
						E48	E	3	10~19	3	Bachelor	3	0.00610998	9			3	FL	0.001222	0.00183299	0.00244399	0.00305499					3	FL	0.001222	0.00183299	0.00244399	0.00305499
						E49	SM	5	GE30	5	Bachelor	3	0.00882553	13			1	VL	0	0	0.000882553	0.00176511					2	L	0.000882553	0.00176511	0.00176511	0.00264766
						E50	SM	5	GE30	5	Bachelor	3	0	0
						E51	SM	5	20~29	4	Master	4	0.00882553	13			7	VH	0.00706042	0.00794297	0.00882553	0.00882553					4	M	0.00353021	0.00441276	0.00441276	0.00529532
						E52	T	2	10~19	3	Master	4	0.00610998	9			5	FH	0.00305499	0.00366599	0.00427699	0.00488798					4	M	0.00244399	0.00305499	0.00305499	0.00366599
						E53	SM	5	10~19	3	PhD	5	0.00882553	13			1	VL	0	0	0.000882553	0.00176511					2	L	0.000882553	0.00176511	0.00176511	0.00264766
						E54	JM	4	20~29	4	Bachelor	3	0.00746775	11			2	L	0.000746775	0.00149355	0.00149355	0.00224033					2	L	0.000746775	0.00149355	0.00149355	0.00224033
						E55	SM	5	20~29	4	Master	4	0.00882553	13			1	VL	0	0	0.000882553	0.00176511					1	VL	0	0	0.000882553	0.00176511
						E56	JM	4	20~29	4	Master	4	0.00814664	12			2	L	0.000814664	0.00162933	0.00162933	0.00244399					2	L	0.000814664	0.00162933	0.00162933	0.00244399
						E57	E	3	10~19	3	Master	4	0.00678887	10			5	FH	0.00339443	0.00407332	0.00475221	0.00543109					5	FH	0.00339443	0.00407332	0.00475221	0.00543109
						E58	SM	5	20~29	4	Master	4	0.00882553	13			1	VL	0	0	0.000882553	0.00176511					1	VL	0	0	0.000882553	0.00176511
						E59	JM	4	20~29	4	Master	4	0.00814664	12			1	VL	0	0	0.000814664	0.00162933					1	VL	0	0	0.000814664	0.00162933
						E60	JM	4	10~19	3	Bachelor	3	0.00678887	10			6	H	0.00475221	0.00543109	0.00543109	0.00610998					6	H	0.00475221	0.00543109	0.00543109	0.00610998
						E61	SM	5	20~29	4	Master	4	0.00882553	13			6	H	0.00617787	0.00706042	0.00706042	0.00794297					5	FH	0.00441276	0.00529532	0.00617787	0.00706042
						E62	SM	5	20~29	4	Bachelor	3	0.00814664	12			4	M	0.00325866	0.00407332	0.00407332	0.00488798					4	M	0.00325866	0.00407332	0.00407332	0.00488798
						E63	SM	5	GE30	5	Master	4	0.00950441	14			3	FL	0.00190088	0.00285132	0.00380177	0.00475221					3	FL	0.00190088	0.00285132	0.00380177	0.00475221
						E64	JM	4	10~19	3	Master	4	0.00746775	11			3	FL	0.00149355	0.00224033	0.0029871	0.00373388					3	FL	0.00149355	0.00224033	0.0029871	0.00373388
						E65	JM	4	10~19	3	Bachelor	3	0.00678887	10			6	H	0.00475221	0.00543109	0.00543109	0.00610998					2	L	0.000678887	0.00135777	0.00135777	0.00203666
						E66	T	2	GE30	5	VE	2	0	0
						E67	E	3	GE30	5	Master	4	0.00814664	12			3	FL	0.00162933	0.00244399	0.00325866	0.00407332					1	VL	0	0	0.000814664	0.00162933
						E68	JM	4	GE30	5	Master	4	0.00882553	13			6	H	0.00617787	0.00706042	0.00706042	0.00794297					4	M	0.00353021	0.00441276	0.00441276	0.00529532
						E69	E	3	20~29	4	Bachelor	3	0.00678887	10			2	L	0.000678887	0.00135777	0.00135777	0.00203666					2	L	0.000678887	0.00135777	0.00135777	0.00203666
						E70	JM	4	10~19	3	Master	4	0.00746775	11			6	H	0.00522743	0.0059742	0.0059742	0.00672098					3	FL	0.00149355	0.00224033	0.0029871	0.00373388
						E71	SM	5	GE30	5	Bachelor	3	0.00882553	13			7	VH	0.00706042	0.00794297	0.00882553	0.00882553					7	VH	0.00706042	0.00794297	0.00882553	0.00882553
						E72	JM	4	20~29	4	Bachelor	3	0.00746775	11			2	L	0.000746775	0.00149355	0.00149355	0.00224033					4	M	0.0029871	0.00373388	0.00373388	0.00448065
						E73	SM	5	10~19	3	Master	4	0.00814664	12			3	FL	0.00162933	0.00244399	0.00325866	0.00407332					3	FL	0.00162933	0.00244399	0.00325866	0.00407332
						E74	SM	5	20~29	4	Master	4	0.00882553	13			4	M	0.00353021	0.00441276	0.00441276	0.00529532					3	FL	0.00176511	0.00264766	0.00353021	0.00441276
						E75	E	3	10~19	3	Master	4	0.00678887	10			5	FH	0.00339443	0.00407332	0.00475221	0.00543109					4	M	0.00271555	0.00339443	0.00339443	0.00407332
						E76	SM	5	20~29	4	Master	4	0.00882553	13			1	VL	0	0	0.000882553	0.00176511					1	VL	0	0	0.000882553	0.00176511
						E77	SM	5	6~9	2	Master	4	0.00746775	11			4	M	0.0029871	0.00373388	0.00373388	0.00448065					5	FH	0.00373388	0.00448065	0.00522743	0.0059742
						E78	T	2	10~19	3	Bachelor	3	0.00543109	8			1	VL	0	0	0.000543109	0.00108622					3	FL	0.00108622	0.00162933	0.00217244	0.00271555
						E79	SM	5	10~19	3	VE	2	0.00678887	10			3	FL	0.00135777	0.00203666	0.00271555	0.00339443					3	FL	0.00135777	0.00203666	0.00271555	0.00339443
						E80	JM	4	GE30	5	Bachelor	3	0.00814664	12			5	FH	0.00407332	0.00488798	0.00570265	0.00651731					5	FH	0.00407332	0.00488798	0.00570265	0.00651731
						E81	E	3	10~19	3	PhD	5	0.00746775	11			2	L	0.000746775	0.00149355	0.00149355	0.00224033					2	L	0.000746775	0.00149355	0.00149355	0.00224033
						E82	JM	4	10~19	3	Bachelor	3	0.00678887	10			1	VL	0	0	0.000678887	0.00135777					2	L	0.000678887	0.00135777	0.00135777	0.00203666
						E83	SM	5	20~29	4	PhD	5	0.00950441	14			6	H	0.00665309	0.00760353	0.00760353	0.00855397					3	FL	0.00190088	0.00285132	0.00380177	0.00475221
						E84	SM	5	10~19	3	Master	4	0.00814664	12			5	FH	0.00407332	0.00488798	0.00570265	0.00651731					5	FH	0.00407332	0.00488798	0.00570265	0.00651731
						E85	JM	4	6~9	2	Bachelor	3	0.00610998	9			5	FH	0.00305499	0.00366599	0.00427699	0.00488798					2	L	0.000610998	0.001222	0.001222	0.00183299
						E86	SM	5	10~19	3	Master	4	0.00814664	12			5	FH	0.00407332	0.00488798	0.00570265	0.00651731					4	M	0.00325866	0.00407332	0.00407332	0.00488798
						E87	E	3	10~19	3	Bachelor	3	0.00610998	9			1	VL	0	0	0.000610998	0.001222					3	FL	0.001222	0.00183299	0.00244399	0.00305499
						E88	SM	5	10~19	3	Master	4	0.00814664	12			1	VL	0	0	0.000814664	0.00162933					3	FL	0.00162933	0.00244399	0.00325866	0.00407332
						E89	SM	5	20~29	4	PhD	5	0.00950441	14			3	FL	0.00190088	0.00285132	0.00380177	0.00475221					3	FL	0.00190088	0.00285132	0.00380177	0.00475221
						E90	E	3	GE30	5	Bachelor	3	0.00746775	11			6	H	0.00522743	0.0059742	0.0059742	0.00672098					6	H	0.00522743	0.0059742	0.0059742	0.00672098
						E91	E	3	10~19	3	Master	4	0.00678887	10			1	VL	0	0	0.000678887	0.00135777					1	VL	0	0	0.000678887	0.00135777
						E92	E	3	GE30	5	Bachelor	3	0.00746775	11			7	VH	0.0059742	0.00672098	0.00746775	0.00746775					3	FL	0.00149355	0.00224033	0.0029871	0.00373388
						E93	SM	5	GE30	5	Master	4	0.00950441	14			2	L	0.000950441	0.00190088	0.00190088	0.00285132					2	L	0.000950441	0.00190088	0.00190088	0.00285132
						E94	SM	5	20~29	4	Master	4	0.00882553	13			2	L	0.000882553	0.00176511	0.00176511	0.00264766					3	FL	0.00176511	0.00264766	0.00353021	0.00441276
						E95	SM	5	10~19	3	Bachelor	3	0.00746775	11			2	L	0.000746775	0.00149355	0.00149355	0.00224033					2	L	0.000746775	0.00149355	0.00149355	0.00224033
						E96	JM	4	20~29	4	Bachelor	3	0.00746775	11			7	VH	0.0059742	0.00672098	0.00746775	0.00746775					4	M	0.0029871	0.00373388	0.00373388	0.00448065
						E97	SM	5	GE30	5	Bachelor	3	0.00882553	13			2	L	0.000882553	0.00176511	0.00176511	0.00264766					2	L	0.000882553	0.00176511	0.00176511	0.00264766
						E98	JM	4	GE30	5	Master	4	0.00882553	13			5	FH	0.00441276	0.00529532	0.00617787	0.00706042					3	FL	0.00176511	0.00264766	0.00353021	0.00441276
						E99	E	3	6~9	2	Bachelor	3	0.00543109	8			4	M	0.00217244	0.00271555	0.00271555	0.00325866					6	H	0.00380177	0.00434487	0.00434487	0.00488798
						E100	E	3	10~19	3	Bachelor	3	0.00610998	9			7	VH	0.00488798	0.00549898	0.00610998	0.00610998					3	FL	0.001222	0.00183299	0.00244399	0.00305499
						E101	SM	5	10~19	3	Bachelor	3	0.00746775	11			6	H	0.00522743	0.0059742	0.0059742	0.00672098					5	FH	0.00373388	0.00448065	0.00522743	0.0059742
						E102	SM	5	20~29	4	PhD	5	0.00950441	14			6	H	0.00665309	0.00760353	0.00760353	0.00855397					5	FH	0.00475221	0.00570265	0.00665309	0.00760353
						E103	SM	5	10~19	3	Bachelor	3	0.00746775	11			2	L	0.000746775	0.00149355	0.00149355	0.00224033					2	L	0.000746775	0.00149355	0.00149355	0.00224033
						E104	SM	5	20~29	4	Bachelor	3	0.00814664	12			1	VL	0	0	0.000814664	0.00162933					1	VL	0	0	0.000814664	0.00162933
						E105	E	3	10~19	3	Bachelor	3	0.00610998	9			3	FL	0.001222	0.00183299	0.00244399	0.00305499					3	FL	0.001222	0.00183299	0.00244399	0.00305499
						E106	SM	5	10~19	3	Bachelor	3	0.00746775	11			5	FH	0.00373388	0.00448065	0.00522743	0.0059742					2	L	0.000746775	0.00149355	0.00149355	0.00224033
						E107	E	3	20~29	4	Master	4	0.00746775	11			7	VH	0.0059742	0.00672098	0.00746775	0.00746775					7	VH	0.0059742	0.00672098	0.00746775	0.00746775
						E108	JM	4	10~19	3	Master	4	0.00746775	11			4	M	0.0029871	0.00373388	0.00373388	0.00448065					3	FL	0.00149355	0.00224033	0.0029871	0.00373388
						E109	E	3	20~29	4	Bachelor	3	0.00678887	10			3	FL	0.00135777	0.00203666	0.00271555	0.00339443					2	L	0.000678887	0.00135777	0.00135777	0.00203666
						E110	T	2	10~19	3	Bachelor	3	0.00543109	8			3	FL	0.00108622	0.00162933	0.00217244	0.00271555					1	VL	0	0	0.000543109	0.00108622
						E111	SM	5	GE30	5	Master	4	0.00950441	14			4	M	0.00380177	0.00475221	0.00475221	0.00570265					5	FH	0.00475221	0.00570265	0.00665309	0.00760353
						E112	JM	4	10~19	3	Master	4	0.00746775	11			4	M	0.0029871	0.00373388	0.00373388	0.00448065					4	M	0.0029871	0.00373388	0.00373388	0.00448065
						E113	SM	5	10~19	3	Master	4	0.00814664	12			2	L	0.000814664	0.00162933	0.00162933	0.00244399					3	FL	0.00162933	0.00244399	0.00325866	0.00407332
						E114	T	2	20~29	4	Master	4	0.00678887	10			4	M	0.00271555	0.00339443	0.00339443	0.00407332					3	FL	0.00135777	0.00203666	0.00271555	0.00339443
						E115	SM	5	10~19	3	Master	4	0.00814664	12			3	FL	0.00162933	0.00244399	0.00325866	0.00407332					4	M	0.00325866	0.00407332	0.00407332	0.00488798
						E116	SM	5	20~29	4	Master	4	0.00882553	13			2	L	0.000882553	0.00176511	0.00176511	0.00264766					1	VL	0	0	0.000882553	0.00176511
						E117	SM	5	20~29	4	Master	4	0.00882553	13			2	L	0.000882553	0.00176511	0.00176511	0.00264766					1	VL	0	0	0.000882553	0.00176511
						E118	JM	4	10~19	3	Master	4	0	0
						E119	T	2	20~29	4	Bachelor	3	0.00610998	9			1	VL	0	0	0.000610998	0.001222					1	VL	0	0	0.000610998	0.001222
						E120	E	3	GE30	5	Master	4	0.00814664	12			6	H	0.00570265	0.00651731	0.00651731	0.00733198					3	FL	0.00162933	0.00244399	0.00325866	0.00407332
						E121	JM	4	10~19	3	Master	4	0.00746775	11			4	M	0.0029871	0.00373388	0.00373388	0.00448065					4	M	0.0029871	0.00373388	0.00373388	0.00448065
						E122	SM	5	GE30	5	Bachelor	3	0.00882553	13			6	H	0.00617787	0.00706042	0.00706042	0.00794297					2	L	0.000882553	0.00176511	0.00176511	0.00264766
						E123	SM	5	20~29	4	Master	4	0.00882553	13			2	L	0.000882553	0.00176511	0.00176511	0.00264766					2	L	0.000882553	0.00176511	0.00176511	0.00264766
						E124	SM	5	GE30	5	Bachelor	3	0.00882553	13			4	M	0.00353021	0.00441276	0.00441276	0.00529532					4	M	0.00353021	0.00441276	0.00441276	0.00529532
						E125	E	3	20~29	4	PhD	5	0.00814664	12			3	FL	0.00162933	0.00244399	0.00325866	0.00407332					3	FL	0.00162933	0.00244399	0.00325866	0.00407332
						E126	SM	5	10~19	3	PhD	5	0.00882553	13			4	M	0.00353021	0.00441276	0.00441276	0.00529532					4	M	0.00353021	0.00441276	0.00441276	0.00529532
						E127	E	3	10~19	3	Bachelor	3	0.00610998	9			3	FL	0.001222	0.00183299	0.00244399	0.00305499					4	M	0.00244399	0.00305499	0.00305499	0.00366599
						E128	T	2	GE30	5	Bachelor	3	0.00678887	10			3	FL	0.00135777	0.00203666	0.00271555	0.00339443					4	M	0.00271555	0.00339443	0.00339443	0.00407332
						E129	SM	5	10~19	3	Bachelor	3	0.00746775	11			5	FH	0.00373388	0.00448065	0.00522743	0.0059742					5	FH	0.00373388	0.00448065	0.00522743	0.0059742
						E130	JM	4	GE30	5	Master	4	0.00882553	13			5	FH	0.00441276	0.00529532	0.00617787	0.00706042					5	FH	0.00441276	0.00529532	0.00617787	0.00706042
						E131	SM	5	10~19	3	Master	4	0.00814664	12			1	VL	0	0	0.000814664	0.00162933					3	FL	0.00162933	0.00244399	0.00325866	0.00407332
						E132	SM	5	10~19	3	Master	4	0.00814664	12			3	FL	0.00162933	0.00244399	0.00325866	0.00407332					2	L	0.000814664	0.00162933	0.00162933	0.00244399
						E133	SM	5	GE30	5	Bachelor	3	0.00882553	13			5	FH	0.00441276	0.00529532	0.00617787	0.00706042					2	L	0.000882553	0.00176511	0.00176511	0.00264766
						E134	E	3	10~19	3	Bachelor	3	0.00610998	9			6	H	0.00427699	0.00488798	0.00488798	0.00549898					4	M	0.00244399	0.00305499	0.00305499	0.00366599
						E135	SM	5	GE30	5	Master	4	0.00950441	14			2	L	0.000950441	0.00190088	0.00190088	0.00285132					3	FL	0.00190088	0.00285132	0.00380177	0.00475221
						E136	SM	5	10~19	3	Master	4	0.00814664	12			5	FH	0.00407332	0.00488798	0.00570265	0.00651731					4	M	0.00325866	0.00407332	0.00407332	0.00488798
						E137	SM	5	20~29	4	Master	4	0.00882553	13			1	VL	0	0	0.000882553	0.00176511					1	VL	0	0	0.000882553	0.00176511
													1						0.369043	0.456076	0.507468	0.598642	0.483026	2.35369	0.00442904				0.298574	0.387508	0.443041	0.538629	0.417284	2.57192	0.00267964

## Sheet: BE22,BE24
																	BE22										BE24
																	sparks from port cranes and stacker/tractor-trailer units (not be intrinsically safe).										sparks from dropping objects during stores loading/waste removal.
Expression	a	b	c	d		Expert ID	PP	PPS	ST	STS	EL	ELS	Wi	SUM Ei	SUM		Expression No.	Expression	a	b	c	d	FP	C	OR		Expression No.	Expression	a	b	c	d	FP	C	OR
VL	0	0	0.1	0.2		E1	JM	4	10~19	3	Bachelor	3	0.00672948	10	1486		5	FH	0.00336474	0.00403769	0.00471063	0.00538358					3	FL	0.0013459	0.00201884	0.00269179	0.00336474
L	0.1	0.2	0.2	0.3		E2	E	3	20~29	4	Bachelor	3	0.00672948	10			5	FH	0.00336474	0.00403769	0.00471063	0.00538358					3	FL	0.0013459	0.00201884	0.00269179	0.00336474
FL	0.2	0.3	0.4	0.5		E3	E	3	10~19	3	Master	4	0.00672948	10			4	M	0.00269179	0.00336474	0.00336474	0.00403769					3	FL	0.0013459	0.00201884	0.00269179	0.00336474
M	0.4	0.5	0.5	0.6		E4	E	3	10~19	3	Master	4	0.00672948	10			5	FH	0.00336474	0.00403769	0.00471063	0.00538358					5	FH	0.00336474	0.00403769	0.00471063	0.00538358
FH	0.5	0.6	0.7	0.8		E5	E	3	10~19	3	Master	4	0.00672948	10			5	FH	0.00336474	0.00403769	0.00471063	0.00538358					5	FH	0.00336474	0.00403769	0.00471063	0.00538358
H	0.7	0.8	0.8	0.9		E6	E	3	20~29	4	Bachelor	3	0.00672948	10			7	VH	0.00538358	0.00605653	0.00672948	0.00672948					7	VH	0.00538358	0.00605653	0.00672948	0.00672948
VH	0.8	0.9	1	1		E7	SM	5	20~29	4	Bachelor	3	0.00807537	12			5	FH	0.00403769	0.00484522	0.00565276	0.0064603					4	M	0.00323015	0.00403769	0.00403769	0.00484522
						E8	T	2	20~29	4	Bachelor	3	0.00605653	9			5	FH	0.00302826	0.00363392	0.00423957	0.00484522					2	L	0.000605653	0.00121131	0.00121131	0.00181696
						E9	E	3	10~19	3	Master	4	0.00672948	10			6	H	0.00471063	0.00538358	0.00538358	0.00605653					4	M	0.00269179	0.00336474	0.00336474	0.00403769
						E10	T	2	GE30	5	PhD	5	0.00807537	12			4	M	0.00323015	0.00403769	0.00403769	0.00484522					3	FL	0.00161507	0.00242261	0.00323015	0.00403769
						E11	T	2	10~19	3	Master	4	0.00605653	9			1	VL	0	0	0.000605653	0.00121131					1	VL	0	0	0.000605653	0.00121131
						E12	E	3	GE30	5	Master	4	0.00807537	12			5	FH	0.00403769	0.00484522	0.00565276	0.0064603					5	FH	0.00403769	0.00484522	0.00565276	0.0064603
						E13	T	2	6~9	2	Bachelor	3	0.00471063	7			5	FH	0.00235532	0.00282638	0.00329744	0.00376851					3	FL	0.000942127	0.00141319	0.00188425	0.00235532
						E14	JM	4	GE30	5	Bachelor	3	0.00807537	12			6	H	0.00565276	0.0064603	0.0064603	0.00726783					3	FL	0.00161507	0.00242261	0.00323015	0.00403769
						E15	T	2	20~29	4	PhD	5	0.00740242	11			6	H	0.0051817	0.00592194	0.00592194	0.00666218					3	FL	0.00148048	0.00222073	0.00296097	0.00370121
						E16	SM	5	6~9	2	PhD	5	0.00807537	12			3	FL	0.00161507	0.00242261	0.00323015	0.00403769					4	M	0.00323015	0.00403769	0.00403769	0.00484522
						E17	SM	5	10~19	3	Bachelor	3	0.00740242	11			4	M	0.00296097	0.00370121	0.00370121	0.00444145					4	M	0.00296097	0.00370121	0.00370121	0.00444145
						E18	JM	4	10~19	3	Bachelor	3	0.00672948	10			4	M	0.00269179	0.00336474	0.00336474	0.00403769					4	M	0.00269179	0.00336474	0.00336474	0.00403769
						E19	SM	5	20~29	4	Bachelor	3	0.00807537	12			7	VH	0.0064603	0.00726783	0.00807537	0.00807537					6	H	0.00565276	0.0064603	0.0064603	0.00726783
						E20	JM	4	GE30	5	Bachelor	3	0.00807537	12			6	H	0.00565276	0.0064603	0.0064603	0.00726783					2	L	0.000807537	0.00161507	0.00161507	0.00242261
						E21	E	3	10~19	3	Bachelor	3	0.00605653	9			6	H	0.00423957	0.00484522	0.00484522	0.00545087					5	FH	0.00302826	0.00363392	0.00423957	0.00484522
						E22	E	3	LE5	1	PhD	5	0.00605653	9			2	L	0.000605653	0.00121131	0.00121131	0.00181696					2	L	0.000605653	0.00121131	0.00121131	0.00181696
						E23	T	2	20~29	4	PhD	5	0.00740242	11			7	VH	0.00592194	0.00666218	0.00740242	0.00740242					2	L	0.000740242	0.00148048	0.00148048	0.00222073
						E24	T	2	6~9	2	Master	4	0.00538358	8			5	FH	0.00269179	0.00323015	0.00376851	0.00430686					4	M	0.00215343	0.00269179	0.00269179	0.00323015
						E25	SM	5	GE30	5	Bachelor	3	0.00874832	13			6	H	0.00612382	0.00699865	0.00699865	0.00787349					3	FL	0.00174966	0.0026245	0.00349933	0.00437416
						E26	JM	4	20~29	4	Bachelor	3	0.00740242	11			2	L	0.000740242	0.00148048	0.00148048	0.00222073					2	L	0.000740242	0.00148048	0.00148048	0.00222073
						E27	SM	5	GE30	5	Bachelor	3	0.00874832	13			1	VL	0	0	0.000874832	0.00174966					1	VL	0	0	0.000874832	0.00174966
						E28	E	3	GE30	5	Master	4	0.00807537	12			4	M	0.00323015	0.00403769	0.00403769	0.00484522					4	M	0.00323015	0.00403769	0.00403769	0.00484522
						E29	SM	5	10~19	3	Master	4	0.00807537	12			4	M	0.00323015	0.00403769	0.00403769	0.00484522					2	L	0.000807537	0.00161507	0.00161507	0.00242261
						E30	T	2	GE30	5	PhD	5	0.00807537	12			4	M	0.00323015	0.00403769	0.00403769	0.00484522					2	L	0.000807537	0.00161507	0.00161507	0.00242261
						E31	SM	5	20~29	4	VE	2	0.00740242	11			7	VH	0.00592194	0.00666218	0.00740242	0.00740242					1	VL	0	0	0.000740242	0.00148048
						E32	E	3	10~19	3	PhD	5	0.00740242	11			6	H	0.0051817	0.00592194	0.00592194	0.00666218					5	FH	0.00370121	0.00444145	0.0051817	0.00592194
						E33	T	2	10~19	3	Master	4	0.00605653	9			6	H	0.00423957	0.00484522	0.00484522	0.00545087					4	M	0.00242261	0.00302826	0.00302826	0.00363392
						E34	SM	5	20~29	4	Master	4	0.00874832	13			2	L	0.000874832	0.00174966	0.00174966	0.0026245					2	L	0.000874832	0.00174966	0.00174966	0.0026245
						E35	W	1	10~19	3	Bachelor	3	0	0
						E36	SM	5	20~29	4	Master	4	0.00874832	13			3	FL	0.00174966	0.0026245	0.00349933	0.00437416					2	L	0.000874832	0.00174966	0.00174966	0.0026245
						E37	T	2	10~19	3	Bachelor	3	0.00538358	8			3	FL	0.00107672	0.00161507	0.00215343	0.00269179					1	VL	0	0	0.000538358	0.00107672
						E38	E	3	LE5	1	Master	4	0	0
						E39	E	3	LE5	1	Master	4	0.00538358	8			5	FH	0.00269179	0.00323015	0.00376851	0.00430686					2	L	0.000538358	0.00107672	0.00107672	0.00161507
						E40	E	3	10~19	3	Bachelor	3	0.00605653	9			7	VH	0.00484522	0.00545087	0.00605653	0.00605653					5	FH	0.00302826	0.00363392	0.00423957	0.00484522
						E41	T	2	6~9	2	Master	4	0.00538358	8			5	FH	0.00269179	0.00323015	0.00376851	0.00430686					4	M	0.00215343	0.00269179	0.00269179	0.00323015
						E42	JM	4	10~19	3	Bachelor	3	0.00672948	10			2	L	0.000672948	0.0013459	0.0013459	0.00201884					2	L	0.000672948	0.0013459	0.0013459	0.00201884
						E43	E	3	6~9	2	Master	4	0.00605653	9			2	L	0.000605653	0.00121131	0.00121131	0.00181696					4	M	0.00242261	0.00302826	0.00302826	0.00363392
						E44	JM	4	10~19	3	Master	4	0.00740242	11			5	FH	0.00370121	0.00444145	0.0051817	0.00592194					6	H	0.0051817	0.00592194	0.00592194	0.00666218
						E45	JM	4	10~19	3	Master	4	0.00740242	11			5	FH	0.00370121	0.00444145	0.0051817	0.00592194					5	FH	0.00370121	0.00444145	0.0051817	0.00592194
						E46	E	3	20~29	4	Bachelor	3	0.00672948	10			5	FH	0.00336474	0.00403769	0.00471063	0.00538358					6	H	0.00471063	0.00538358	0.00538358	0.00605653
						E47	E	3	20~29	4	Bachelor	3	0.00672948	10			2	L	0.000672948	0.0013459	0.0013459	0.00201884					2	L	0.000672948	0.0013459	0.0013459	0.00201884
						E48	E	3	10~19	3	Bachelor	3	0.00605653	9			4	M	0.00242261	0.00302826	0.00302826	0.00363392					3	FL	0.00121131	0.00181696	0.00242261	0.00302826
						E49	SM	5	GE30	5	Bachelor	3	0.00874832	13			2	L	0.000874832	0.00174966	0.00174966	0.0026245					2	L	0.000874832	0.00174966	0.00174966	0.0026245
						E50	SM	5	GE30	5	Bachelor	3	0.00874832	13			2	L	0.000874832	0.00174966	0.00174966	0.0026245					2	L	0.000874832	0.00174966	0.00174966	0.0026245
						E51	SM	5	20~29	4	Master	4	0.00874832	13			4	M	0.00349933	0.00437416	0.00437416	0.00524899					6	H	0.00612382	0.00699865	0.00699865	0.00787349
						E52	T	2	10~19	3	Master	4	0.00605653	9			5	FH	0.00302826	0.00363392	0.00423957	0.00484522					3	FL	0.00121131	0.00181696	0.00242261	0.00302826
						E53	SM	5	10~19	3	PhD	5	0.00874832	13			2	L	0.000874832	0.00174966	0.00174966	0.0026245					1	VL	0	0	0.000874832	0.00174966
						E54	JM	4	20~29	4	Bachelor	3	0.00740242	11			3	FL	0.00148048	0.00222073	0.00296097	0.00370121					2	L	0.000740242	0.00148048	0.00148048	0.00222073
						E55	SM	5	20~29	4	Master	4	0.00874832	13			1	VL	0	0	0.000874832	0.00174966					1	VL	0	0	0.000874832	0.00174966
						E56	JM	4	20~29	4	Master	4	0.00807537	12			2	L	0.000807537	0.00161507	0.00161507	0.00242261					2	L	0.000807537	0.00161507	0.00161507	0.00242261
						E57	E	3	10~19	3	Master	4	0.00672948	10			5	FH	0.00336474	0.00403769	0.00471063	0.00538358					2	L	0.000672948	0.0013459	0.0013459	0.00201884
						E58	SM	5	20~29	4	Master	4	0.00874832	13			1	VL	0	0	0.000874832	0.00174966					1	VL	0	0	0.000874832	0.00174966
						E59	JM	4	20~29	4	Master	4	0.00807537	12			4	M	0.00323015	0.00403769	0.00403769	0.00484522					4	M	0.00323015	0.00403769	0.00403769	0.00484522
						E60	JM	4	10~19	3	Bachelor	3	0.00672948	10			5	FH	0.00336474	0.00403769	0.00471063	0.00538358					3	FL	0.0013459	0.00201884	0.00269179	0.00336474
						E61	SM	5	20~29	4	Master	4	0.00874832	13			6	H	0.00612382	0.00699865	0.00699865	0.00787349					6	H	0.00612382	0.00699865	0.00699865	0.00787349
						E62	SM	5	20~29	4	Bachelor	3	0.00807537	12			4	M	0.00323015	0.00403769	0.00403769	0.00484522					4	M	0.00323015	0.00403769	0.00403769	0.00484522
						E63	SM	5	GE30	5	Master	4	0.00942127	14			4	M	0.00376851	0.00471063	0.00471063	0.00565276					2	L	0.000942127	0.00188425	0.00188425	0.00282638
						E64	JM	4	10~19	3	Master	4	0.00740242	11			2	L	0.000740242	0.00148048	0.00148048	0.00222073					1	VL	0	0	0.000740242	0.00148048
						E65	JM	4	10~19	3	Bachelor	3	0.00672948	10			2	L	0.000672948	0.0013459	0.0013459	0.00201884					4	M	0.00269179	0.00336474	0.00336474	0.00403769
						E66	T	2	GE30	5	VE	2	0	0
						E67	E	3	GE30	5	Master	4	0.00807537	12			2	L	0.000807537	0.00161507	0.00161507	0.00242261					2	L	0.000807537	0.00161507	0.00161507	0.00242261
						E68	JM	4	GE30	5	Master	4	0.00874832	13			3	FL	0.00174966	0.0026245	0.00349933	0.00437416					2	L	0.000874832	0.00174966	0.00174966	0.0026245
						E69	E	3	20~29	4	Bachelor	3	0.00672948	10			3	FL	0.0013459	0.00201884	0.00269179	0.00336474					1	VL	0	0	0.000672948	0.0013459
						E70	JM	4	10~19	3	Master	4	0.00740242	11			5	FH	0.00370121	0.00444145	0.0051817	0.00592194					5	FH	0.00370121	0.00444145	0.0051817	0.00592194
						E71	SM	5	GE30	5	Bachelor	3	0.00874832	13			7	VH	0.00699865	0.00787349	0.00874832	0.00874832					2	L	0.000874832	0.00174966	0.00174966	0.0026245
						E72	JM	4	20~29	4	Bachelor	3	0.00740242	11			3	FL	0.00148048	0.00222073	0.00296097	0.00370121					1	VL	0	0	0.000740242	0.00148048
						E73	SM	5	10~19	3	Master	4	0.00807537	12			4	M	0.00323015	0.00403769	0.00403769	0.00484522					4	M	0.00323015	0.00403769	0.00403769	0.00484522
						E74	SM	5	20~29	4	Master	4	0.00874832	13			4	M	0.00349933	0.00437416	0.00437416	0.00524899					3	FL	0.00174966	0.0026245	0.00349933	0.00437416
						E75	E	3	10~19	3	Master	4	0.00672948	10			4	M	0.00269179	0.00336474	0.00336474	0.00403769					4	M	0.00269179	0.00336474	0.00336474	0.00403769
						E76	SM	5	20~29	4	Master	4	0.00874832	13			3	FL	0.00174966	0.0026245	0.00349933	0.00437416					1	VL	0	0	0.000874832	0.00174966
						E77	SM	5	6~9	2	Master	4	0.00740242	11			5	FH	0.00370121	0.00444145	0.0051817	0.00592194					4	M	0.00296097	0.00370121	0.00370121	0.00444145
						E78	T	2	10~19	3	Bachelor	3	0.00538358	8			3	FL	0.00107672	0.00161507	0.00215343	0.00269179					3	FL	0.00107672	0.00161507	0.00215343	0.00269179
						E79	SM	5	10~19	3	VE	2	0.00672948	10			2	L	0.000672948	0.0013459	0.0013459	0.00201884					2	L	0.000672948	0.0013459	0.0013459	0.00201884
						E80	JM	4	GE30	5	Bachelor	3	0.00807537	12			5	FH	0.00403769	0.00484522	0.00565276	0.0064603					3	FL	0.00161507	0.00242261	0.00323015	0.00403769
						E81	E	3	10~19	3	PhD	5	0.00740242	11			6	H	0.0051817	0.00592194	0.00592194	0.00666218					3	FL	0.00148048	0.00222073	0.00296097	0.00370121
						E82	JM	4	10~19	3	Bachelor	3	0.00672948	10			2	L	0.000672948	0.0013459	0.0013459	0.00201884					3	FL	0.0013459	0.00201884	0.00269179	0.00336474
						E83	SM	5	20~29	4	PhD	5	0.00942127	14			5	FH	0.00471063	0.00565276	0.00659489	0.00753701					3	FL	0.00188425	0.00282638	0.00376851	0.00471063
						E84	SM	5	10~19	3	Master	4	0.00807537	12			5	FH	0.00403769	0.00484522	0.00565276	0.0064603					4	M	0.00323015	0.00403769	0.00403769	0.00484522
						E85	JM	4	6~9	2	Bachelor	3	0.00605653	9			5	FH	0.00302826	0.00363392	0.00423957	0.00484522					3	FL	0.00121131	0.00181696	0.00242261	0.00302826
						E86	SM	5	10~19	3	Master	4	0.00807537	12			4	M	0.00323015	0.00403769	0.00403769	0.00484522					4	M	0.00323015	0.00403769	0.00403769	0.00484522
						E87	E	3	10~19	3	Bachelor	3	0.00605653	9			3	FL	0.00121131	0.00181696	0.00242261	0.00302826					3	FL	0.00121131	0.00181696	0.00242261	0.00302826
						E88	SM	5	10~19	3	Master	4	0.00807537	12			4	M	0.00323015	0.00403769	0.00403769	0.00484522					2	L	0.000807537	0.00161507	0.00161507	0.00242261
						E89	SM	5	20~29	4	PhD	5	0.00942127	14			4	M	0.00376851	0.00471063	0.00471063	0.00565276					3	FL	0.00188425	0.00282638	0.00376851	0.00471063
						E90	E	3	GE30	5	Bachelor	3	0.00740242	11			6	H	0.0051817	0.00592194	0.00592194	0.00666218					6	H	0.0051817	0.00592194	0.00592194	0.00666218
						E91	E	3	10~19	3	Master	4	0.00672948	10			1	VL	0	0	0.000672948	0.0013459					1	VL	0	0	0.000672948	0.0013459
						E92	E	3	GE30	5	Bachelor	3	0.00740242	11			6	H	0.0051817	0.00592194	0.00592194	0.00666218					2	L	0.000740242	0.00148048	0.00148048	0.00222073
						E93	SM	5	GE30	5	Master	4	0.00942127	14			2	L	0.000942127	0.00188425	0.00188425	0.00282638					2	L	0.000942127	0.00188425	0.00188425	0.00282638
						E94	SM	5	20~29	4	Master	4	0.00874832	13			4	M	0.00349933	0.00437416	0.00437416	0.00524899					2	L	0.000874832	0.00174966	0.00174966	0.0026245
						E95	SM	5	10~19	3	Bachelor	3	0.00740242	11			2	L	0.000740242	0.00148048	0.00148048	0.00222073					2	L	0.000740242	0.00148048	0.00148048	0.00222073
						E96	JM	4	20~29	4	Bachelor	3	0.00740242	11			7	VH	0.00592194	0.00666218	0.00740242	0.00740242					7	VH	0.00592194	0.00666218	0.00740242	0.00740242
						E97	SM	5	GE30	5	Bachelor	3	0.00874832	13			5	FH	0.00437416	0.00524899	0.00612382	0.00699865					2	L	0.000874832	0.00174966	0.00174966	0.0026245
						E98	JM	4	GE30	5	Master	4	0.00874832	13			5	FH	0.00437416	0.00524899	0.00612382	0.00699865					2	L	0.000874832	0.00174966	0.00174966	0.0026245
						E99	E	3	6~9	2	Bachelor	3	0.00538358	8			4	M	0.00215343	0.00269179	0.00269179	0.00323015					5	FH	0.00269179	0.00323015	0.00376851	0.00430686
						E100	E	3	10~19	3	Bachelor	3	0.00605653	9			1	VL	0	0	0.000605653	0.00121131					3	FL	0.00121131	0.00181696	0.00242261	0.00302826
						E101	SM	5	10~19	3	Bachelor	3	0.00740242	11			5	FH	0.00370121	0.00444145	0.0051817	0.00592194					5	FH	0.00370121	0.00444145	0.0051817	0.00592194
						E102	SM	5	20~29	4	PhD	5	0.00942127	14			5	FH	0.00471063	0.00565276	0.00659489	0.00753701					2	L	0.000942127	0.00188425	0.00188425	0.00282638
						E103	SM	5	10~19	3	Bachelor	3	0.00740242	11			3	FL	0.00148048	0.00222073	0.00296097	0.00370121					1	VL	0	0	0.000740242	0.00148048
						E104	SM	5	20~29	4	Bachelor	3	0.00807537	12			2	L	0.000807537	0.00161507	0.00161507	0.00242261					2	L	0.000807537	0.00161507	0.00161507	0.00242261
						E105	E	3	10~19	3	Bachelor	3	0.00605653	9			3	FL	0.00121131	0.00181696	0.00242261	0.00302826					5	FH	0.00302826	0.00363392	0.00423957	0.00484522
						E106	SM	5	10~19	3	Bachelor	3	0.00740242	11			3	FL	0.00148048	0.00222073	0.00296097	0.00370121					4	M	0.00296097	0.00370121	0.00370121	0.00444145
						E107	E	3	20~29	4	Master	4	0.00740242	11			7	VH	0.00592194	0.00666218	0.00740242	0.00740242					7	VH	0.00592194	0.00666218	0.00740242	0.00740242
						E108	JM	4	10~19	3	Master	4	0.00740242	11			4	M	0.00296097	0.00370121	0.00370121	0.00444145					4	M	0.00296097	0.00370121	0.00370121	0.00444145
						E109	E	3	20~29	4	Bachelor	3	0.00672948	10			2	L	0.000672948	0.0013459	0.0013459	0.00201884					2	L	0.000672948	0.0013459	0.0013459	0.00201884
						E110	T	2	10~19	3	Bachelor	3	0.00538358	8			1	VL	0	0	0.000538358	0.00107672					2	L	0.000538358	0.00107672	0.00107672	0.00161507
						E111	SM	5	GE30	5	Master	4	0.00942127	14			4	M	0.00376851	0.00471063	0.00471063	0.00565276					5	FH	0.00471063	0.00565276	0.00659489	0.00753701
						E112	JM	4	10~19	3	Master	4	0.00740242	11			4	M	0.00296097	0.00370121	0.00370121	0.00444145					5	FH	0.00370121	0.00444145	0.0051817	0.00592194
						E113	SM	5	10~19	3	Master	4	0.00807537	12			5	FH	0.00403769	0.00484522	0.00565276	0.0064603					4	M	0.00323015	0.00403769	0.00403769	0.00484522
						E114	T	2	20~29	4	Master	4	0.00672948	10			4	M	0.00269179	0.00336474	0.00336474	0.00403769					2	L	0.000672948	0.0013459	0.0013459	0.00201884
						E115	SM	5	10~19	3	Master	4	0.00807537	12			4	M	0.00323015	0.00403769	0.00403769	0.00484522					4	M	0.00323015	0.00403769	0.00403769	0.00484522
						E116	SM	5	20~29	4	Master	4	0.00874832	13			3	FL	0.00174966	0.0026245	0.00349933	0.00437416					1	VL	0	0	0.000874832	0.00174966
						E117	SM	5	20~29	4	Master	4	0.00874832	13			3	FL	0.00174966	0.0026245	0.00349933	0.00437416					1	VL	0	0	0.000874832	0.00174966
						E118	JM	4	10~19	3	Master	4	0	0
						E119	T	2	20~29	4	Bachelor	3	0.00605653	9			1	VL	0	0	0.000605653	0.00121131					2	L	0.000605653	0.00121131	0.00121131	0.00181696
						E120	E	3	GE30	5	Master	4	0.00807537	12			4	M	0.00323015	0.00403769	0.00403769	0.00484522					5	FH	0.00403769	0.00484522	0.00565276	0.0064603
						E121	JM	4	10~19	3	Master	4	0.00740242	11			5	FH	0.00370121	0.00444145	0.0051817	0.00592194					5	FH	0.00370121	0.00444145	0.0051817	0.00592194
						E122	SM	5	GE30	5	Bachelor	3	0.00874832	13			2	L	0.000874832	0.00174966	0.00174966	0.0026245					6	H	0.00612382	0.00699865	0.00699865	0.00787349
						E123	SM	5	20~29	4	Master	4	0.00874832	13			3	FL	0.00174966	0.0026245	0.00349933	0.00437416					3	FL	0.00174966	0.0026245	0.00349933	0.00437416
						E124	SM	5	GE30	5	Bachelor	3	0.00874832	13			4	M	0.00349933	0.00437416	0.00437416	0.00524899					4	M	0.00349933	0.00437416	0.00437416	0.00524899
						E125	E	3	20~29	4	PhD	5	0.00807537	12			3	FL	0.00161507	0.00242261	0.00323015	0.00403769					2	L	0.000807537	0.00161507	0.00161507	0.00242261
						E126	SM	5	10~19	3	PhD	5	0.00874832	13			4	M	0.00349933	0.00437416	0.00437416	0.00524899					4	M	0.00349933	0.00437416	0.00437416	0.00524899
						E127	E	3	10~19	3	Bachelor	3	0.00605653	9			5	FH	0.00302826	0.00363392	0.00423957	0.00484522					3	FL	0.00121131	0.00181696	0.00242261	0.00302826
						E128	T	2	GE30	5	Bachelor	3	0.00672948	10			4	M	0.00269179	0.00336474	0.00336474	0.00403769					4	M	0.00269179	0.00336474	0.00336474	0.00403769
						E129	SM	5	10~19	3	Bachelor	3	0.00740242	11			5	FH	0.00370121	0.00444145	0.0051817	0.00592194					5	FH	0.00370121	0.00444145	0.0051817	0.00592194
						E130	JM	4	GE30	5	Master	4	0.00874832	13			4	M	0.00349933	0.00437416	0.00437416	0.00524899					4	M	0.00349933	0.00437416	0.00437416	0.00524899
						E131	SM	5	10~19	3	Master	4	0.00807537	12			3	FL	0.00161507	0.00242261	0.00323015	0.00403769					3	FL	0.00161507	0.00242261	0.00323015	0.00403769
						E132	SM	5	10~19	3	Master	4	0.00807537	12			2	L	0.000807537	0.00161507	0.00161507	0.00242261					2	L	0.000807537	0.00161507	0.00161507	0.00242261
						E133	SM	5	GE30	5	Bachelor	3	0.00874832	13			5	FH	0.00437416	0.00524899	0.00612382	0.00699865					1	VL	0	0	0.000874832	0.00174966
						E134	E	3	10~19	3	Bachelor	3	0.00605653	9			4	M	0.00242261	0.00302826	0.00302826	0.00363392					6	H	0.00423957	0.00484522	0.00484522	0.00545087
						E135	SM	5	GE30	5	Master	4	0.00942127	14			3	FL	0.00188425	0.00282638	0.00376851	0.00471063					1	VL	0	0	0.000942127	0.00188425
						E136	SM	5	10~19	3	Master	4	0.00807537	12			4	M	0.00323015	0.00403769	0.00403769	0.00484522					4	M	0.00323015	0.00403769	0.00403769	0.00484522
						E137	SM	5	20~29	4	Master	4	0.00874832	13			1	VL	0	0	0.000874832	0.00174966					1	VL	0	0	0.000874832	0.00174966
													1						0.370256	0.463728	0.513661	0.607739	0.488879	2.33538	0.00461977				0.261306	0.347039	0.392127	0.489973	0.373288	2.73479	0.00184164

## Sheet: BE23
																	BE23
																	dropping objects during stores loading/waste removal.
Expression	a	b	c	d		Expert ID	PP	PPS	ST	STS	EL	ELS	Wi	SUM Ei	SUM		Expression No.	Expression	a	b	c	d	FP	C	OR
VL	0	0	0.1	0.2		E1	JM	4	10~19	3	Bachelor	3	0.00662691	10	1509		3	FL	0.00132538	0.00198807	0.00265076	0.00331345
L	0.1	0.2	0.2	0.3		E2	E	3	20~29	4	Bachelor	3	0.00662691	10			4	M	0.00265076	0.00331345	0.00331345	0.00397614
FL	0.2	0.3	0.4	0.5		E3	E	3	10~19	3	Master	4	0.00662691	10			4	M	0.00265076	0.00331345	0.00331345	0.00397614
M	0.4	0.5	0.5	0.6		E4	E	3	10~19	3	Master	4	0.00662691	10			5	FH	0.00331345	0.00397614	0.00463883	0.00530152
FH	0.5	0.6	0.7	0.8		E5	E	3	10~19	3	Master	4	0.00662691	10			4	M	0.00265076	0.00331345	0.00331345	0.00397614
H	0.7	0.8	0.8	0.9		E6	E	3	20~29	4	Bachelor	3	0.00662691	10			4	M	0.00265076	0.00331345	0.00331345	0.00397614
VH	0.8	0.9	1	1		E7	SM	5	20~29	4	Bachelor	3	0.00795229	12			4	M	0.00318091	0.00397614	0.00397614	0.00477137
						E8	T	2	20~29	4	Bachelor	3	0.00596421	9			2	L	0.000596421	0.00119284	0.00119284	0.00178926
						E9	E	3	10~19	3	Master	4	0.00662691	10			7	VH	0.00530152	0.00596421	0.00662691	0.00662691
						E10	T	2	GE30	5	PhD	5	0	0
						E11	T	2	10~19	3	Master	4	0.00596421	9			1	VL	0	0	0.000596421	0.00119284
						E12	E	3	GE30	5	Master	4	0.00795229	12			4	M	0.00318091	0.00397614	0.00397614	0.00477137
						E13	T	2	6~9	2	Bachelor	3	0.00463883	7			4	M	0.00185553	0.00231942	0.00231942	0.0027833
						E14	JM	4	GE30	5	Bachelor	3	0.00795229	12			4	M	0.00318091	0.00397614	0.00397614	0.00477137
						E15	T	2	20~29	4	PhD	5	0.0072896	11			6	H	0.00510272	0.00583168	0.00583168	0.00656064
						E16	SM	5	6~9	2	PhD	5	0.00795229	12			3	FL	0.00159046	0.00238569	0.00318091	0.00397614
						E17	SM	5	10~19	3	Bachelor	3	0.0072896	11			5	FH	0.0036448	0.00437376	0.00510272	0.00583168
						E18	JM	4	10~19	3	Bachelor	3	0.00662691	10			3	FL	0.00132538	0.00198807	0.00265076	0.00331345
						E19	SM	5	20~29	4	Bachelor	3	0.00795229	12			6	H	0.0055666	0.00636183	0.00636183	0.00715706
						E20	JM	4	GE30	5	Bachelor	3	0.00795229	12			3	FL	0.00159046	0.00238569	0.00318091	0.00397614
						E21	E	3	10~19	3	Bachelor	3	0.00596421	9			7	VH	0.00477137	0.00536779	0.00596421	0.00596421
						E22	E	3	LE5	1	PhD	5	0.00596421	9			6	H	0.00417495	0.00477137	0.00477137	0.00536779
						E23	T	2	20~29	4	PhD	5	0.0072896	11			3	FL	0.00145792	0.00218688	0.00291584	0.0036448
						E24	T	2	6~9	2	Master	4	0.00530152	8			1	VL	0	0	0.000530152	0.0010603
						E25	SM	5	GE30	5	Bachelor	3	0.00861498	13			4	M	0.00344599	0.00430749	0.00430749	0.00516899
						E26	JM	4	20~29	4	Bachelor	3	0.0072896	11			2	L	0.00072896	0.00145792	0.00145792	0.00218688
						E27	SM	5	GE30	5	Bachelor	3	0.00861498	13			1	VL	0	0	0.000861498	0.001723
						E28	E	3	GE30	5	Master	4	0.00795229	12			4	M	0.00318091	0.00397614	0.00397614	0.00477137
						E29	SM	5	10~19	3	Master	4	0.00795229	12			3	FL	0.00159046	0.00238569	0.00318091	0.00397614
						E30	T	2	GE30	5	PhD	5	0.00795229	12			2	L	0.000795229	0.00159046	0.00159046	0.00238569
						E31	SM	5	20~29	4	VE	2	0.0072896	11			2	L	0.00072896	0.00145792	0.00145792	0.00218688
						E32	E	3	10~19	3	PhD	5	0.0072896	11			5	FH	0.0036448	0.00437376	0.00510272	0.00583168
						E33	T	2	10~19	3	Master	4	0.00596421	9			5	FH	0.00298211	0.00357853	0.00417495	0.00477137
						E34	SM	5	20~29	4	Master	4	0.00861498	13			2	L	0.000861498	0.001723	0.001723	0.00258449
						E35	W	1	10~19	3	Bachelor	3	0.00463883	7			2	L	0.000463883	0.000927767	0.000927767	0.00139165
						E36	SM	5	20~29	4	Master	4	0.00861498	13			2	L	0.000861498	0.001723	0.001723	0.00258449
						E37	T	2	10~19	3	Bachelor	3	0.00530152	8			2	L	0.000530152	0.0010603	0.0010603	0.00159046
						E38	E	3	LE5	1	Master	4	0.00530152	8			2	L	0.000530152	0.0010603	0.0010603	0.00159046
						E39	E	3	LE5	1	Master	4	0.00530152	8			5	FH	0.00265076	0.00318091	0.00371107	0.00424122
						E40	E	3	10~19	3	Bachelor	3	0.00596421	9			5	FH	0.00298211	0.00357853	0.00417495	0.00477137
						E41	T	2	6~9	2	Master	4	0.00530152	8			6	H	0.00371107	0.00424122	0.00424122	0.00477137
						E42	JM	4	10~19	3	Bachelor	3	0.00662691	10			1	VL	0	0	0.000662691	0.00132538
						E43	E	3	6~9	2	Master	4	0.00596421	9			6	H	0.00417495	0.00477137	0.00477137	0.00536779
						E44	JM	4	10~19	3	Master	4	0.0072896	11			5	FH	0.0036448	0.00437376	0.00510272	0.00583168
						E45	JM	4	10~19	3	Master	4	0.0072896	11			5	FH	0.0036448	0.00437376	0.00510272	0.00583168
						E46	E	3	20~29	4	Bachelor	3	0.00662691	10			6	H	0.00463883	0.00530152	0.00530152	0.00596421
						E47	E	3	20~29	4	Bachelor	3	0.00662691	10			4	M	0.00265076	0.00331345	0.00331345	0.00397614
						E48	E	3	10~19	3	Bachelor	3	0.00596421	9			3	FL	0.00119284	0.00178926	0.00238569	0.00298211
						E49	SM	5	GE30	5	Bachelor	3	0.00861498	13			2	L	0.000861498	0.001723	0.001723	0.00258449
						E50	SM	5	GE30	5	Bachelor	3	0.00861498	13			2	L	0.000861498	0.001723	0.001723	0.00258449
						E51	SM	5	20~29	4	Master	4	0.00861498	13			6	H	0.00603048	0.00689198	0.00689198	0.00775348
						E52	T	2	10~19	3	Master	4	0.00596421	9			3	FL	0.00119284	0.00178926	0.00238569	0.00298211
						E53	SM	5	10~19	3	PhD	5	0.00861498	13			1	VL	0	0	0.000861498	0.001723
						E54	JM	4	20~29	4	Bachelor	3	0.0072896	11			2	L	0.00072896	0.00145792	0.00145792	0.00218688
						E55	SM	5	20~29	4	Master	4	0.00861498	13			1	VL	0	0	0.000861498	0.001723
						E56	JM	4	20~29	4	Master	4	0.00795229	12			2	L	0.000795229	0.00159046	0.00159046	0.00238569
						E57	E	3	10~19	3	Master	4	0.00662691	10			4	M	0.00265076	0.00331345	0.00331345	0.00397614
						E58	SM	5	20~29	4	Master	4	0.00861498	13			1	VL	0	0	0.000861498	0.001723
						E59	JM	4	20~29	4	Master	4	0.00795229	12			4	M	0.00318091	0.00397614	0.00397614	0.00477137
						E60	JM	4	10~19	3	Bachelor	3	0.00662691	10			3	FL	0.00132538	0.00198807	0.00265076	0.00331345
						E61	SM	5	20~29	4	Master	4	0.00861498	13			6	H	0.00603048	0.00689198	0.00689198	0.00775348
						E62	SM	5	20~29	4	Bachelor	3	0.00795229	12			4	M	0.00318091	0.00397614	0.00397614	0.00477137
						E63	SM	5	GE30	5	Master	4	0.00927767	14			2	L	0.000927767	0.00185553	0.00185553	0.0027833
						E64	JM	4	10~19	3	Master	4	0.0072896	11			2	L	0.00072896	0.00145792	0.00145792	0.00218688
						E65	JM	4	10~19	3	Bachelor	3	0.00662691	10			2	L	0.000662691	0.00132538	0.00132538	0.00198807
						E66	T	2	GE30	5	VE	2	0.00596421	9			4	M	0.00238569	0.00298211	0.00298211	0.00357853
						E67	E	3	GE30	5	Master	4	0.00795229	12			3	FL	0.00159046	0.00238569	0.00318091	0.00397614
						E68	JM	4	GE30	5	Master	4	0.00861498	13			2	L	0.000861498	0.001723	0.001723	0.00258449
						E69	E	3	20~29	4	Bachelor	3	0.00662691	10			3	FL	0.00132538	0.00198807	0.00265076	0.00331345
						E70	JM	4	10~19	3	Master	4	0.0072896	11			5	FH	0.0036448	0.00437376	0.00510272	0.00583168
						E71	SM	5	GE30	5	Bachelor	3	0.00861498	13			2	L	0.000861498	0.001723	0.001723	0.00258449
						E72	JM	4	20~29	4	Bachelor	3	0.0072896	11			1	VL	0	0	0.00072896	0.00145792
						E73	SM	5	10~19	3	Master	4	0.00795229	12			4	M	0.00318091	0.00397614	0.00397614	0.00477137
						E74	SM	5	20~29	4	Master	4	0.00861498	13			3	FL	0.001723	0.00258449	0.00344599	0.00430749
						E75	E	3	10~19	3	Master	4	0.00662691	10			4	M	0.00265076	0.00331345	0.00331345	0.00397614
						E76	SM	5	20~29	4	Master	4	0.00861498	13			2	L	0.000861498	0.001723	0.001723	0.00258449
						E77	SM	5	6~9	2	Master	4	0.0072896	11			5	FH	0.0036448	0.00437376	0.00510272	0.00583168
						E78	T	2	10~19	3	Bachelor	3	0.00530152	8			3	FL	0.0010603	0.00159046	0.00212061	0.00265076
						E79	SM	5	10~19	3	VE	2	0.00662691	10			2	L	0.000662691	0.00132538	0.00132538	0.00198807
						E80	JM	4	GE30	5	Bachelor	3	0.00795229	12			3	FL	0.00159046	0.00238569	0.00318091	0.00397614
						E81	E	3	10~19	3	PhD	5	0.0072896	11			3	FL	0.00145792	0.00218688	0.00291584	0.0036448
						E82	JM	4	10~19	3	Bachelor	3	0.00662691	10			3	FL	0.00132538	0.00198807	0.00265076	0.00331345
						E83	SM	5	20~29	4	PhD	5	0.00927767	14			6	H	0.00649437	0.00742213	0.00742213	0.0083499
						E84	SM	5	10~19	3	Master	4	0.00795229	12			4	M	0.00318091	0.00397614	0.00397614	0.00477137
						E85	JM	4	6~9	2	Bachelor	3	0.00596421	9			3	FL	0.00119284	0.00178926	0.00238569	0.00298211
						E86	SM	5	10~19	3	Master	4	0.00795229	12			4	M	0.00318091	0.00397614	0.00397614	0.00477137
						E87	E	3	10~19	3	Bachelor	3	0.00596421	9			3	FL	0.00119284	0.00178926	0.00238569	0.00298211
						E88	SM	5	10~19	3	Master	4	0.00795229	12			2	L	0.000795229	0.00159046	0.00159046	0.00238569
						E89	SM	5	20~29	4	PhD	5	0.00927767	14			4	M	0.00371107	0.00463883	0.00463883	0.0055666
						E90	E	3	GE30	5	Bachelor	3	0.0072896	11			6	H	0.00510272	0.00583168	0.00583168	0.00656064
						E91	E	3	10~19	3	Master	4	0.00662691	10			1	VL	0	0	0.000662691	0.00132538
						E92	E	3	GE30	5	Bachelor	3	0.0072896	11			3	FL	0.00145792	0.00218688	0.00291584	0.0036448
						E93	SM	5	GE30	5	Master	4	0.00927767	14			1	VL	0	0	0.000927767	0.00185553
						E94	SM	5	20~29	4	Master	4	0.00861498	13			4	M	0.00344599	0.00430749	0.00430749	0.00516899
						E95	SM	5	10~19	3	Bachelor	3	0.0072896	11			2	L	0.00072896	0.00145792	0.00145792	0.00218688
						E96	JM	4	20~29	4	Bachelor	3	0.0072896	11			5	FH	0.0036448	0.00437376	0.00510272	0.00583168
						E97	SM	5	GE30	5	Bachelor	3	0.00861498	13			4	M	0.00344599	0.00430749	0.00430749	0.00516899
						E98	JM	4	GE30	5	Master	4	0.00861498	13			3	FL	0.001723	0.00258449	0.00344599	0.00430749
						E99	E	3	6~9	2	Bachelor	3	0.00530152	8			6	H	0.00371107	0.00424122	0.00424122	0.00477137
						E100	E	3	10~19	3	Bachelor	3	0.00596421	9			4	M	0.00238569	0.00298211	0.00298211	0.00357853
						E101	SM	5	10~19	3	Bachelor	3	0.0072896	11			5	FH	0.0036448	0.00437376	0.00510272	0.00583168
						E102	SM	5	20~29	4	PhD	5	0.00927767	14			6	H	0.00649437	0.00742213	0.00742213	0.0083499
						E103	SM	5	10~19	3	Bachelor	3	0.0072896	11			1	VL	0	0	0.00072896	0.00145792
						E104	SM	5	20~29	4	Bachelor	3	0.00795229	12			5	FH	0.00397614	0.00477137	0.0055666	0.00636183
						E105	E	3	10~19	3	Bachelor	3	0.00596421	9			5	FH	0.00298211	0.00357853	0.00417495	0.00477137
						E106	SM	5	10~19	3	Bachelor	3	0.0072896	11			4	M	0.00291584	0.0036448	0.0036448	0.00437376
						E107	E	3	20~29	4	Master	4	0.0072896	11			7	VH	0.00583168	0.00656064	0.0072896	0.0072896
						E108	JM	4	10~19	3	Master	4	0.0072896	11			4	M	0.00291584	0.0036448	0.0036448	0.00437376
						E109	E	3	20~29	4	Bachelor	3	0.00662691	10			3	FL	0.00132538	0.00198807	0.00265076	0.00331345
						E110	T	2	10~19	3	Bachelor	3	0.00530152	8			2	L	0.000530152	0.0010603	0.0010603	0.00159046
						E111	SM	5	GE30	5	Master	4	0.00927767	14			4	M	0.00371107	0.00463883	0.00463883	0.0055666
						E112	JM	4	10~19	3	Master	4	0.0072896	11			4	M	0.00291584	0.0036448	0.0036448	0.00437376
						E113	SM	5	10~19	3	Master	4	0.00795229	12			5	FH	0.00397614	0.00477137	0.0055666	0.00636183
						E114	T	2	20~29	4	Master	4	0.00662691	10			2	L	0.000662691	0.00132538	0.00132538	0.00198807
						E115	SM	5	10~19	3	Master	4	0.00795229	12			4	M	0.00318091	0.00397614	0.00397614	0.00477137
						E116	SM	5	20~29	4	Master	4	0.00861498	13			2	L	0.000861498	0.001723	0.001723	0.00258449
						E117	SM	5	20~29	4	Master	4	0.00861498	13			2	L	0.000861498	0.001723	0.001723	0.00258449
						E118	JM	4	10~19	3	Master	4	0.0072896	11			3	FL	0.00145792	0.00218688	0.00291584	0.0036448
						E119	T	2	20~29	4	Bachelor	3	0.00596421	9			1	VL	0	0	0.000596421	0.00119284
						E120	E	3	GE30	5	Master	4	0.00795229	12			4	M	0.00318091	0.00397614	0.00397614	0.00477137
						E121	JM	4	10~19	3	Master	4	0.0072896	11			3	FL	0.00145792	0.00218688	0.00291584	0.0036448
						E122	SM	5	GE30	5	Bachelor	3	0.00861498	13			2	L	0.000861498	0.001723	0.001723	0.00258449
						E123	SM	5	20~29	4	Master	4	0.00861498	13			4	M	0.00344599	0.00430749	0.00430749	0.00516899
						E124	SM	5	GE30	5	Bachelor	3	0.00861498	13			4	M	0.00344599	0.00430749	0.00430749	0.00516899
						E125	E	3	20~29	4	PhD	5	0.00795229	12			2	L	0.000795229	0.00159046	0.00159046	0.00238569
						E126	SM	5	10~19	3	PhD	5	0.00861498	13			4	M	0.00344599	0.00430749	0.00430749	0.00516899
						E127	E	3	10~19	3	Bachelor	3	0.00596421	9			3	FL	0.00119284	0.00178926	0.00238569	0.00298211
						E128	T	2	GE30	5	Bachelor	3	0.00662691	10			5	FH	0.00331345	0.00397614	0.00463883	0.00530152
						E129	SM	5	10~19	3	Bachelor	3	0.0072896	11			5	FH	0.0036448	0.00437376	0.00510272	0.00583168
						E130	JM	4	GE30	5	Master	4	0.00861498	13			4	M	0.00344599	0.00430749	0.00430749	0.00516899
						E131	SM	5	10~19	3	Master	4	0.00795229	12			3	FL	0.00159046	0.00238569	0.00318091	0.00397614
						E132	SM	5	10~19	3	Master	4	0.00795229	12			2	L	0.000795229	0.00159046	0.00159046	0.00238569
						E133	SM	5	GE30	5	Bachelor	3	0.00861498	13			2	L	0.000861498	0.001723	0.001723	0.00258449
						E134	E	3	10~19	3	Bachelor	3	0.00596421	9			4	M	0.00238569	0.00298211	0.00298211	0.00357853
						E135	SM	5	GE30	5	Master	4	0.00927767	14			2	L	0.000927767	0.00185553	0.00185553	0.0027833
						E136	SM	5	10~19	3	Master	4	0.00795229	12			5	FH	0.00397614	0.00477137	0.0055666	0.00636183
						E137	SM	5	20~29	4	Master	4	0.00861498	13			1	VL	0	0	0.000861498	0.001723
													1						0.301789	0.392048	0.433996	0.532008	0.415407	2.57856	0.00263903

## Sheet: BE25
																	BE25
																	sparks/heat from using electric motors-driven rolling hatch covers.
Expression	a	b	c	d		Expert ID	PP	PPS	ST	STS	EL	ELS	Wi	SUM Ei	SUM		Expression No.	Expression	a	b	c	d	FP	C	OR
VL	0	0	0.1	0.2		E1	JM	4	10~19	3	Bachelor	3	0.00684463	10	1461		3	FL	0.00136893	0.00205339	0.00273785	0.00342231
L	0.1	0.2	0.2	0.3		E2	E	3	20~29	4	Bachelor	3	0.00684463	10			3	FL	0.00136893	0.00205339	0.00273785	0.00342231
FL	0.2	0.3	0.4	0.5		E3	E	3	10~19	3	Master	4	0.00684463	10			5	FH	0.00342231	0.00410678	0.00479124	0.0054757
M	0.4	0.5	0.5	0.6		E4	E	3	10~19	3	Master	4	0.00684463	10			6	H	0.00479124	0.0054757	0.0054757	0.00616016
FH	0.5	0.6	0.7	0.8		E5	E	3	10~19	3	Master	4	0.00684463	10			5	FH	0.00342231	0.00410678	0.00479124	0.0054757
H	0.7	0.8	0.8	0.9		E6	E	3	20~29	4	Bachelor	3	0.00684463	10			7	VH	0.0054757	0.00616016	0.00684463	0.00684463
VH	0.8	0.9	1	1		E7	SM	5	20~29	4	Bachelor	3	0.00821355	12			5	FH	0.00410678	0.00492813	0.00574949	0.00657084
						E8	T	2	20~29	4	Bachelor	3	0.00616016	9			4	M	0.00246407	0.00308008	0.00308008	0.0036961
						E9	E	3	10~19	3	Master	4	0.00684463	10			6	H	0.00479124	0.0054757	0.0054757	0.00616016
						E10	T	2	GE30	5	PhD	5	0	0
						E11	T	2	10~19	3	Master	4	0.00616016	9			1	VL	0	0	0.000616016	0.00123203
						E12	E	3	GE30	5	Master	4	0.00821355	12			2	L	0.000821355	0.00164271	0.00164271	0.00246407
						E13	T	2	6~9	2	Bachelor	3	0.00479124	7			4	M	0.0019165	0.00239562	0.00239562	0.00287474
						E14	JM	4	GE30	5	Bachelor	3	0.00821355	12			4	M	0.00328542	0.00410678	0.00410678	0.00492813
						E15	T	2	20~29	4	PhD	5	0.00752909	11			3	FL	0.00150582	0.00225873	0.00301164	0.00376454
						E16	SM	5	6~9	2	PhD	5	0.00821355	12			4	M	0.00328542	0.00410678	0.00410678	0.00492813
						E17	SM	5	10~19	3	Bachelor	3	0.00752909	11			6	H	0.00527036	0.00602327	0.00602327	0.00677618
						E18	JM	4	10~19	3	Bachelor	3	0.00684463	10			3	FL	0.00136893	0.00205339	0.00273785	0.00342231
						E19	SM	5	20~29	4	Bachelor	3	0.00821355	12			7	VH	0.00657084	0.0073922	0.00821355	0.00821355
						E20	JM	4	GE30	5	Bachelor	3	0.00821355	12			6	H	0.00574949	0.00657084	0.00657084	0.0073922
						E21	E	3	10~19	3	Bachelor	3	0.00616016	9			6	H	0.00431211	0.00492813	0.00492813	0.00554415
						E22	E	3	LE5	1	PhD	5	0.00616016	9			5	FH	0.00308008	0.0036961	0.00431211	0.00492813
						E23	T	2	20~29	4	PhD	5	0.00752909	11			6	H	0.00527036	0.00602327	0.00602327	0.00677618
						E24	T	2	6~9	2	Master	4	0.0054757	8			4	M	0.00219028	0.00273785	0.00273785	0.00328542
						E25	SM	5	GE30	5	Bachelor	3	0.00889802	13			3	FL	0.0017796	0.0026694	0.00355921	0.00444901
						E26	JM	4	20~29	4	Bachelor	3	0.00752909	11			3	FL	0.00150582	0.00225873	0.00301164	0.00376454
						E27	SM	5	GE30	5	Bachelor	3	0.00889802	13			2	L	0.000889802	0.0017796	0.0017796	0.0026694
						E28	E	3	GE30	5	Master	4	0.00821355	12			5	FH	0.00410678	0.00492813	0.00574949	0.00657084
						E29	SM	5	10~19	3	Master	4	0.00821355	12			4	M	0.00328542	0.00410678	0.00410678	0.00492813
						E30	T	2	GE30	5	PhD	5	0.00821355	12			3	FL	0.00164271	0.00246407	0.00328542	0.00410678
						E31	SM	5	20~29	4	VE	2	0.00752909	11			5	FH	0.00376454	0.00451745	0.00527036	0.00602327
						E32	E	3	10~19	3	PhD	5	0.00752909	11			5	FH	0.00376454	0.00451745	0.00527036	0.00602327
						E33	T	2	10~19	3	Master	4	0.00616016	9			6	H	0.00431211	0.00492813	0.00492813	0.00554415
						E34	SM	5	20~29	4	Master	4	0.00889802	13			2	L	0.000889802	0.0017796	0.0017796	0.0026694
						E35	W	1	10~19	3	Bachelor	3	0	0
						E36	SM	5	20~29	4	Master	4	0.00889802	13			3	FL	0.0017796	0.0026694	0.00355921	0.00444901
						E37	T	2	10~19	3	Bachelor	3	0.0054757	8			4	M	0.00219028	0.00273785	0.00273785	0.00328542
						E38	E	3	LE5	1	Master	4	0	0
						E39	E	3	LE5	1	Master	4	0.0054757	8			5	FH	0.00273785	0.00328542	0.00383299	0.00438056
						E40	E	3	10~19	3	Bachelor	3	0.00616016	9			7	VH	0.00492813	0.00554415	0.00616016	0.00616016
						E41	T	2	6~9	2	Master	4	0.0054757	8			7	VH	0.00438056	0.00492813	0.0054757	0.0054757
						E42	JM	4	10~19	3	Bachelor	3	0.00684463	10			2	L	0.000684463	0.00136893	0.00136893	0.00205339
						E43	E	3	6~9	2	Master	4	0.00616016	9			6	H	0.00431211	0.00492813	0.00492813	0.00554415
						E44	JM	4	10~19	3	Master	4	0.00752909	11			6	H	0.00527036	0.00602327	0.00602327	0.00677618
						E45	JM	4	10~19	3	Master	4	0.00752909	11			6	H	0.00527036	0.00602327	0.00602327	0.00677618
						E46	E	3	20~29	4	Bachelor	3	0.00684463	10			6	H	0.00479124	0.0054757	0.0054757	0.00616016
						E47	E	3	20~29	4	Bachelor	3	0.00684463	10			2	L	0.000684463	0.00136893	0.00136893	0.00205339
						E48	E	3	10~19	3	Bachelor	3	0.00616016	9			3	FL	0.00123203	0.00184805	0.00246407	0.00308008
						E49	SM	5	GE30	5	Bachelor	3	0.00889802	13			2	L	0.000889802	0.0017796	0.0017796	0.0026694
						E50	SM	5	GE30	5	Bachelor	3	0	0
						E51	SM	5	20~29	4	Master	4	0.00889802	13			6	H	0.00622861	0.00711841	0.00711841	0.00800821
						E52	T	2	10~19	3	Master	4	0.00616016	9			5	FH	0.00308008	0.0036961	0.00431211	0.00492813
						E53	SM	5	10~19	3	PhD	5	0.00889802	13			2	L	0.000889802	0.0017796	0.0017796	0.0026694
						E54	JM	4	20~29	4	Bachelor	3	0.00752909	11			3	FL	0.00150582	0.00225873	0.00301164	0.00376454
						E55	SM	5	20~29	4	Master	4	0.00889802	13			1	VL	0	0	0.000889802	0.0017796
						E56	JM	4	20~29	4	Master	4	0.00821355	12			3	FL	0.00164271	0.00246407	0.00328542	0.00410678
						E57	E	3	10~19	3	Master	4	0.00684463	10			3	FL	0.00136893	0.00205339	0.00273785	0.00342231
						E58	SM	5	20~29	4	Master	4	0.00889802	13			1	VL	0	0	0.000889802	0.0017796
						E59	JM	4	20~29	4	Master	4	0.00821355	12			4	M	0.00328542	0.00410678	0.00410678	0.00492813
						E60	JM	4	10~19	3	Bachelor	3	0.00684463	10			5	FH	0.00342231	0.00410678	0.00479124	0.0054757
						E61	SM	5	20~29	4	Master	4	0.00889802	13			6	H	0.00622861	0.00711841	0.00711841	0.00800821
						E62	SM	5	20~29	4	Bachelor	3	0.00821355	12			4	M	0.00328542	0.00410678	0.00410678	0.00492813
						E63	SM	5	GE30	5	Master	4	0.00958248	14			3	FL	0.0019165	0.00287474	0.00383299	0.00479124
						E64	JM	4	10~19	3	Master	4	0.00752909	11			2	L	0.000752909	0.00150582	0.00150582	0.00225873
						E65	JM	4	10~19	3	Bachelor	3	0.00684463	10			4	M	0.00273785	0.00342231	0.00342231	0.00410678
						E66	T	2	GE30	5	VE	2	0	0
						E67	E	3	GE30	5	Master	4	0.00821355	12			3	FL	0.00164271	0.00246407	0.00328542	0.00410678
						E68	JM	4	GE30	5	Master	4	0.00889802	13			3	FL	0.0017796	0.0026694	0.00355921	0.00444901
						E69	E	3	20~29	4	Bachelor	3	0.00684463	10			3	FL	0.00136893	0.00205339	0.00273785	0.00342231
						E70	JM	4	10~19	3	Master	4	0.00752909	11			5	FH	0.00376454	0.00451745	0.00527036	0.00602327
						E71	SM	5	GE30	5	Bachelor	3	0.00889802	13			6	H	0.00622861	0.00711841	0.00711841	0.00800821
						E72	JM	4	20~29	4	Bachelor	3	0.00752909	11			3	FL	0.00150582	0.00225873	0.00301164	0.00376454
						E73	SM	5	10~19	3	Master	4	0.00821355	12			5	FH	0.00410678	0.00492813	0.00574949	0.00657084
						E74	SM	5	20~29	4	Master	4	0.00889802	13			3	FL	0.0017796	0.0026694	0.00355921	0.00444901
						E75	E	3	10~19	3	Master	4	0.00684463	10			4	M	0.00273785	0.00342231	0.00342231	0.00410678
						E76	SM	5	20~29	4	Master	4	0.00889802	13			2	L	0.000889802	0.0017796	0.0017796	0.0026694
						E77	SM	5	6~9	2	Master	4	0.00752909	11			6	H	0.00527036	0.00602327	0.00602327	0.00677618
						E78	T	2	10~19	3	Bachelor	3	0.0054757	8			2	L	0.00054757	0.00109514	0.00109514	0.00164271
						E79	SM	5	10~19	3	VE	2	0.00684463	10			2	L	0.000684463	0.00136893	0.00136893	0.00205339
						E80	JM	4	GE30	5	Bachelor	3	0.00821355	12			3	FL	0.00164271	0.00246407	0.00328542	0.00410678
						E81	E	3	10~19	3	PhD	5	0.00752909	11			6	H	0.00527036	0.00602327	0.00602327	0.00677618
						E82	JM	4	10~19	3	Bachelor	3	0.00684463	10			2	L	0.000684463	0.00136893	0.00136893	0.00205339
						E83	SM	5	20~29	4	PhD	5	0.00958248	14			5	FH	0.00479124	0.00574949	0.00670773	0.00766598
						E84	SM	5	10~19	3	Master	4	0.00821355	12			5	FH	0.00410678	0.00492813	0.00574949	0.00657084
						E85	JM	4	6~9	2	Bachelor	3	0.00616016	9			5	FH	0.00308008	0.0036961	0.00431211	0.00492813
						E86	SM	5	10~19	3	Master	4	0.00821355	12			3	FL	0.00164271	0.00246407	0.00328542	0.00410678
						E87	E	3	10~19	3	Bachelor	3	0.00616016	9			2	L	0.000616016	0.00123203	0.00123203	0.00184805
						E88	SM	5	10~19	3	Master	4	0.00821355	12			4	M	0.00328542	0.00410678	0.00410678	0.00492813
						E89	SM	5	20~29	4	PhD	5	0.00958248	14			4	M	0.00383299	0.00479124	0.00479124	0.00574949
						E90	E	3	GE30	5	Bachelor	3	0.00752909	11			5	FH	0.00376454	0.00451745	0.00527036	0.00602327
						E91	E	3	10~19	3	Master	4	0.00684463	10			1	VL	0	0	0.000684463	0.00136893
						E92	E	3	GE30	5	Bachelor	3	0.00752909	11			6	H	0.00527036	0.00602327	0.00602327	0.00677618
						E93	SM	5	GE30	5	Master	4	0.00958248	14			1	VL	0	0	0.000958248	0.0019165
						E94	SM	5	20~29	4	Master	4	0.00889802	13			4	M	0.00355921	0.00444901	0.00444901	0.00533881
						E95	SM	5	10~19	3	Bachelor	3	0.00752909	11			2	L	0.000752909	0.00150582	0.00150582	0.00225873
						E96	JM	4	20~29	4	Bachelor	3	0.00752909	11			7	VH	0.00602327	0.00677618	0.00752909	0.00752909
						E97	SM	5	GE30	5	Bachelor	3	0.00889802	13			3	FL	0.0017796	0.0026694	0.00355921	0.00444901
						E98	JM	4	GE30	5	Master	4	0.00889802	13			3	FL	0.0017796	0.0026694	0.00355921	0.00444901
						E99	E	3	6~9	2	Bachelor	3	0.0054757	8			5	FH	0.00273785	0.00328542	0.00383299	0.00438056
						E100	E	3	10~19	3	Bachelor	3	0.00616016	9			7	VH	0.00492813	0.00554415	0.00616016	0.00616016
						E101	SM	5	10~19	3	Bachelor	3	0.00752909	11			5	FH	0.00376454	0.00451745	0.00527036	0.00602327
						E102	SM	5	20~29	4	PhD	5	0.00958248	14			5	FH	0.00479124	0.00574949	0.00670773	0.00766598
						E103	SM	5	10~19	3	Bachelor	3	0.00752909	11			2	L	0.000752909	0.00150582	0.00150582	0.00225873
						E104	SM	5	20~29	4	Bachelor	3	0.00821355	12			4	M	0.00328542	0.00410678	0.00410678	0.00492813
						E105	E	3	10~19	3	Bachelor	3	0.00616016	9			6	H	0.00431211	0.00492813	0.00492813	0.00554415
						E106	SM	5	10~19	3	Bachelor	3	0.00752909	11			4	M	0.00301164	0.00376454	0.00376454	0.00451745
						E107	E	3	20~29	4	Master	4	0.00752909	11			7	VH	0.00602327	0.00677618	0.00752909	0.00752909
						E108	JM	4	10~19	3	Master	4	0.00752909	11			4	M	0.00301164	0.00376454	0.00376454	0.00451745
						E109	E	3	20~29	4	Bachelor	3	0.00684463	10			2	L	0.000684463	0.00136893	0.00136893	0.00205339
						E110	T	2	10~19	3	Bachelor	3	0.0054757	8			3	FL	0.00109514	0.00164271	0.00219028	0.00273785
						E111	SM	5	GE30	5	Master	4	0.00958248	14			4	M	0.00383299	0.00479124	0.00479124	0.00574949
						E112	JM	4	10~19	3	Master	4	0.00752909	11			5	FH	0.00376454	0.00451745	0.00527036	0.00602327
						E113	SM	5	10~19	3	Master	4	0.00821355	12			5	FH	0.00410678	0.00492813	0.00574949	0.00657084
						E114	T	2	20~29	4	Master	4	0.00684463	10			2	L	0.000684463	0.00136893	0.00136893	0.00205339
						E115	SM	5	10~19	3	Master	4	0.00821355	12			4	M	0.00328542	0.00410678	0.00410678	0.00492813
						E116	SM	5	20~29	4	Master	4	0.00889802	13			3	FL	0.0017796	0.0026694	0.00355921	0.00444901
						E117	SM	5	20~29	4	Master	4	0.00889802	13			3	FL	0.0017796	0.0026694	0.00355921	0.00444901
						E118	JM	4	10~19	3	Master	4	0	0
						E119	T	2	20~29	4	Bachelor	3	0.00616016	9			2	L	0.000616016	0.00123203	0.00123203	0.00184805
						E120	E	3	GE30	5	Master	4	0.00821355	12			6	H	0.00574949	0.00657084	0.00657084	0.0073922
						E121	JM	4	10~19	3	Master	4	0.00752909	11			3	FL	0.00150582	0.00225873	0.00301164	0.00376454
						E122	SM	5	GE30	5	Bachelor	3	0.00889802	13			6	H	0.00622861	0.00711841	0.00711841	0.00800821
						E123	SM	5	20~29	4	Master	4	0.00889802	13			3	FL	0.0017796	0.0026694	0.00355921	0.00444901
						E124	SM	5	GE30	5	Bachelor	3	0.00889802	13			4	M	0.00355921	0.00444901	0.00444901	0.00533881
						E125	E	3	20~29	4	PhD	5	0.00821355	12			3	FL	0.00164271	0.00246407	0.00328542	0.00410678
						E126	SM	5	10~19	3	PhD	5	0.00889802	13			4	M	0.00355921	0.00444901	0.00444901	0.00533881
						E127	E	3	10~19	3	Bachelor	3	0.00616016	9			3	FL	0.00123203	0.00184805	0.00246407	0.00308008
						E128	T	2	GE30	5	Bachelor	3	0.00684463	10			5	FH	0.00342231	0.00410678	0.00479124	0.0054757
						E129	SM	5	10~19	3	Bachelor	3	0.00752909	11			6	H	0.00527036	0.00602327	0.00602327	0.00677618
						E130	JM	4	GE30	5	Master	4	0.00889802	13			4	M	0.00355921	0.00444901	0.00444901	0.00533881
						E131	SM	5	10~19	3	Master	4	0.00821355	12			4	M	0.00328542	0.00410678	0.00410678	0.00492813
						E132	SM	5	10~19	3	Master	4	0.00821355	12			4	M	0.00328542	0.00410678	0.00410678	0.00492813
						E133	SM	5	GE30	5	Bachelor	3	0.00889802	13			7	VH	0.00711841	0.00800821	0.00889802	0.00889802
						E134	E	3	10~19	3	Bachelor	3	0.00616016	9			4	M	0.00246407	0.00308008	0.00308008	0.0036961
						E135	SM	5	GE30	5	Master	4	0.00958248	14			2	L	0.000958248	0.0019165	0.0019165	0.00287474
						E136	SM	5	10~19	3	Master	4	0.00821355	12			6	H	0.00574949	0.00657084	0.00657084	0.0073922
						E137	SM	5	20~29	4	Master	4	0.00889802	13			1	VL	0	0	0.000889802	0.0017796
													1						0.380082	0.475154	0.524846	0.619165	0.499771	2.3017	0.00499225

## Sheet: BE26
																	BE26
																	sparks/heat from using electric motors-driven rolling hatch covers.2
Expression	a	b	c	d		Expert ID	PP	PPS	ST	STS	EL	ELS	Wi	SUM Ei	SUM		Expression No.	Expression	a	b	c	d	FP	C	OR
VL	0	0	0.1	0.2		E1	JM	4	10~19	3	Bachelor	3	0	0	1112
L	0.1	0.2	0.2	0.3		E2	E	3	20~29	4	Bachelor	3	0	0
FL	0.2	0.3	0.4	0.5		E3	E	3	10~19	3	Master	4	0	0
M	0.4	0.5	0.5	0.6		E4	E	3	10~19	3	Master	4	0	0
FH	0.5	0.6	0.7	0.8		E5	E	3	10~19	3	Master	4	0	0
H	0.7	0.8	0.8	0.9		E6	E	3	20~29	4	Bachelor	3	0	0
VH	0.8	0.9	1	1		E7	SM	5	20~29	4	Bachelor	3	0	0
						E8	T	2	20~29	4	Bachelor	3	0	0
						E9	E	3	10~19	3	Master	4	0	0
						E10	T	2	GE30	5	PhD	5	0	0
						E11	T	2	10~19	3	Master	4	0	0
						E12	E	3	GE30	5	Master	4	0	0
						E13	T	2	6~9	2	Bachelor	3	0	0
						E14	JM	4	GE30	5	Bachelor	3	0	0
						E15	T	2	20~29	4	PhD	5	0	0
						E16	SM	5	6~9	2	PhD	5	0	0
						E17	SM	5	10~19	3	Bachelor	3	0	0
						E18	JM	4	10~19	3	Bachelor	3	0	0
						E19	SM	5	20~29	4	Bachelor	3	0	0
						E20	JM	4	GE30	5	Bachelor	3	0	0
						E21	E	3	10~19	3	Bachelor	3	0	0
						E22	E	3	LE5	1	PhD	5	0	0
						E23	T	2	20~29	4	PhD	5	0	0
						E24	T	2	6~9	2	Master	4	0	0
						E25	SM	5	GE30	5	Bachelor	3	0	0
						E26	JM	4	20~29	4	Bachelor	3	0	0
						E27	SM	5	GE30	5	Bachelor	3	0	0
						E28	E	3	GE30	5	Master	4	0	0
						E29	SM	5	10~19	3	Master	4	0.0107914	12			3	FL	0.00215827	0.00323741	0.00431655	0.00539568
						E30	T	2	GE30	5	PhD	5	0.0107914	12			2	L	0.00107914	0.00215827	0.00215827	0.00323741
						E31	SM	5	20~29	4	VE	2	0.00989209	11			7	VH	0.00791367	0.00890288	0.00989209	0.00989209
						E32	E	3	10~19	3	PhD	5	0.00989209	11			5	FH	0.00494604	0.00593525	0.00692446	0.00791367
						E33	T	2	10~19	3	Master	4	0.00809353	9			6	H	0.00566547	0.00647482	0.00647482	0.00728417
						E34	SM	5	20~29	4	Master	4	0.0116906	13			2	L	0.00116906	0.00233813	0.00233813	0.00350719
						E35	W	1	10~19	3	Bachelor	3	0	0
						E36	SM	5	20~29	4	Master	4	0.0116906	13			3	FL	0.00233813	0.00350719	0.00467626	0.00584532
						E37	T	2	10~19	3	Bachelor	3	0.00719424	8			4	M	0.0028777	0.00359712	0.00359712	0.00431655
						E38	E	3	LE5	1	Master	4	0	0
						E39	E	3	LE5	1	Master	4	0.00719424	8			4	M	0.0028777	0.00359712	0.00359712	0.00431655
						E40	E	3	10~19	3	Bachelor	3	0.00809353	9			7	VH	0.00647482	0.00728417	0.00809353	0.00809353
						E41	T	2	6~9	2	Master	4	0.00719424	8			7	VH	0.0057554	0.00647482	0.00719424	0.00719424
						E42	JM	4	10~19	3	Bachelor	3	0.00899281	10			2	L	0.000899281	0.00179856	0.00179856	0.00269784
						E43	E	3	6~9	2	Master	4	0.00809353	9			5	FH	0.00404676	0.00485612	0.00566547	0.00647482
						E44	JM	4	10~19	3	Master	4	0.00989209	11			6	H	0.00692446	0.00791367	0.00791367	0.00890288
						E45	JM	4	10~19	3	Master	4	0.00989209	11			6	H	0.00692446	0.00791367	0.00791367	0.00890288
						E46	E	3	20~29	4	Bachelor	3	0.00899281	10			6	H	0.00629496	0.00719424	0.00719424	0.00809353
						E47	E	3	20~29	4	Bachelor	3	0.00899281	10			2	L	0.000899281	0.00179856	0.00179856	0.00269784
						E48	E	3	10~19	3	Bachelor	3	0.00809353	9			3	FL	0.00161871	0.00242806	0.00323741	0.00404676
						E49	SM	5	GE30	5	Bachelor	3	0.0116906	13			2	L	0.00116906	0.00233813	0.00233813	0.00350719
						E50	SM	5	GE30	5	Bachelor	3	0	0
						E51	SM	5	20~29	4	Master	4	0.0116906	13			6	H	0.00818345	0.00935252	0.00935252	0.0105216
						E52	T	2	10~19	3	Master	4	0	0
						E53	SM	5	10~19	3	PhD	5	0.0116906	13			1	VL	0	0	0.00116906	0.00233813
						E54	JM	4	20~29	4	Bachelor	3	0.00989209	11			2	L	0.000989209	0.00197842	0.00197842	0.00296763
						E55	SM	5	20~29	4	Master	4	0.0116906	13			5	FH	0.00584532	0.00701439	0.00818345	0.00935252
						E56	JM	4	20~29	4	Master	4	0.0107914	12			3	FL	0.00215827	0.00323741	0.00431655	0.00539568
						E57	E	3	10~19	3	Master	4	0.00899281	10			3	FL	0.00179856	0.00269784	0.00359712	0.0044964
						E58	SM	5	20~29	4	Master	4	0.0116906	13			1	VL	0	0	0.00116906	0.00233813
						E59	JM	4	20~29	4	Master	4	0.0107914	12			4	M	0.00431655	0.00539568	0.00539568	0.00647482
						E60	JM	4	10~19	3	Bachelor	3	0	0
						E61	SM	5	20~29	4	Master	4	0.0116906	13			6	H	0.00818345	0.00935252	0.00935252	0.0105216
						E62	SM	5	20~29	4	Bachelor	3	0.0107914	12			4	M	0.00431655	0.00539568	0.00539568	0.00647482
						E63	SM	5	GE30	5	Master	4	0.0125899	14			3	FL	0.00251799	0.00377698	0.00503597	0.00629496
						E64	JM	4	10~19	3	Master	4	0.00989209	11			2	L	0.000989209	0.00197842	0.00197842	0.00296763
						E65	JM	4	10~19	3	Bachelor	3	0.00899281	10			4	M	0.00359712	0.0044964	0.0044964	0.00539568
						E66	T	2	GE30	5	VE	2	0	0
						E67	E	3	GE30	5	Master	4	0.0107914	12			3	FL	0.00215827	0.00323741	0.00431655	0.00539568
						E68	JM	4	GE30	5	Master	4	0.0116906	13			3	FL	0.00233813	0.00350719	0.00467626	0.00584532
						E69	E	3	20~29	4	Bachelor	3	0	0
						E70	JM	4	10~19	3	Master	4	0.00989209	11			5	FH	0.00494604	0.00593525	0.00692446	0.00791367
						E71	SM	5	GE30	5	Bachelor	3	0.0116906	13			6	H	0.00818345	0.00935252	0.00935252	0.0105216
						E72	JM	4	20~29	4	Bachelor	3	0.00989209	11			3	FL	0.00197842	0.00296763	0.00395683	0.00494604
						E73	SM	5	10~19	3	Master	4	0.0107914	12			5	FH	0.00539568	0.00647482	0.00755396	0.00863309
						E74	SM	5	20~29	4	Master	4	0.0116906	13			3	FL	0.00233813	0.00350719	0.00467626	0.00584532
						E75	E	3	10~19	3	Master	4	0.00899281	10			3	FL	0.00179856	0.00269784	0.00359712	0.0044964
						E76	SM	5	20~29	4	Master	4	0.0116906	13			2	L	0.00116906	0.00233813	0.00233813	0.00350719
						E77	SM	5	6~9	2	Master	4	0.00989209	11			5	FH	0.00494604	0.00593525	0.00692446	0.00791367
						E78	T	2	10~19	3	Bachelor	3	0.00719424	8			3	FL	0.00143885	0.00215827	0.0028777	0.00359712
						E79	SM	5	10~19	3	VE	2	0.00899281	10			2	L	0.000899281	0.00179856	0.00179856	0.00269784
						E80	JM	4	GE30	5	Bachelor	3	0.0107914	12			3	FL	0.00215827	0.00323741	0.00431655	0.00539568
						E81	E	3	10~19	3	PhD	5	0	0
						E82	JM	4	10~19	3	Bachelor	3	0.00899281	10			2	L	0.000899281	0.00179856	0.00179856	0.00269784
						E83	SM	5	20~29	4	PhD	5	0.0125899	14			5	FH	0.00629496	0.00755396	0.00881295	0.0100719
						E84	SM	5	10~19	3	Master	4	0.0107914	12			5	FH	0.00539568	0.00647482	0.00755396	0.00863309
						E85	JM	4	6~9	2	Bachelor	3	0.00809353	9			5	FH	0.00404676	0.00485612	0.00566547	0.00647482
						E86	SM	5	10~19	3	Master	4	0.0107914	12			3	FL	0.00215827	0.00323741	0.00431655	0.00539568
						E87	E	3	10~19	3	Bachelor	3	0.00809353	9			3	FL	0.00161871	0.00242806	0.00323741	0.00404676
						E88	SM	5	10~19	3	Master	4	0	0
						E89	SM	5	20~29	4	PhD	5	0.0125899	14			3	FL	0.00251799	0.00377698	0.00503597	0.00629496
						E90	E	3	GE30	5	Bachelor	3	0.00989209	11			5	FH	0.00494604	0.00593525	0.00692446	0.00791367
						E91	E	3	10~19	3	Master	4	0.00899281	10			1	VL	0	0	0.000899281	0.00179856
						E92	E	3	GE30	5	Bachelor	3	0.00989209	11			2	L	0.000989209	0.00197842	0.00197842	0.00296763
						E93	SM	5	GE30	5	Master	4	0.0125899	14			2	L	0.00125899	0.00251799	0.00251799	0.00377698
						E94	SM	5	20~29	4	Master	4	0.0116906	13			4	M	0.00467626	0.00584532	0.00584532	0.00701439
						E95	SM	5	10~19	3	Bachelor	3	0.00989209	11			2	L	0.000989209	0.00197842	0.00197842	0.00296763
						E96	JM	4	20~29	4	Bachelor	3	0.00989209	11			7	VH	0.00791367	0.00890288	0.00989209	0.00989209
						E97	SM	5	GE30	5	Bachelor	3	0.0116906	13			2	L	0.00116906	0.00233813	0.00233813	0.00350719
						E98	JM	4	GE30	5	Master	4	0.0116906	13			2	L	0.00116906	0.00233813	0.00233813	0.00350719
						E99	E	3	6~9	2	Bachelor	3	0.00719424	8			4	M	0.0028777	0.00359712	0.00359712	0.00431655
						E100	E	3	10~19	3	Bachelor	3	0.00809353	9			7	VH	0.00647482	0.00728417	0.00809353	0.00809353
						E101	SM	5	10~19	3	Bachelor	3	0.00989209	11			5	FH	0.00494604	0.00593525	0.00692446	0.00791367
						E102	SM	5	20~29	4	PhD	5	0.0125899	14			5	FH	0.00629496	0.00755396	0.00881295	0.0100719
						E103	SM	5	10~19	3	Bachelor	3	0.00989209	11			2	L	0.000989209	0.00197842	0.00197842	0.00296763
						E104	SM	5	20~29	4	Bachelor	3	0.0107914	12			3	FL	0.00215827	0.00323741	0.00431655	0.00539568
						E105	E	3	10~19	3	Bachelor	3	0.00809353	9			5	FH	0.00404676	0.00485612	0.00566547	0.00647482
						E106	SM	5	10~19	3	Bachelor	3	0.00989209	11			4	M	0.00395683	0.00494604	0.00494604	0.00593525
						E107	E	3	20~29	4	Master	4	0.00989209	11			7	VH	0.00791367	0.00890288	0.00989209	0.00989209
						E108	JM	4	10~19	3	Master	4	0.00989209	11			4	M	0.00395683	0.00494604	0.00494604	0.00593525
						E109	E	3	20~29	4	Bachelor	3	0.00899281	10			2	L	0.000899281	0.00179856	0.00179856	0.00269784
						E110	T	2	10~19	3	Bachelor	3	0.00719424	8			1	VL	0	0	0.000719424	0.00143885
						E111	SM	5	GE30	5	Master	4	0.0125899	14			4	M	0.00503597	0.00629496	0.00629496	0.00755396
						E112	JM	4	10~19	3	Master	4	0.00989209	11			4	M	0.00395683	0.00494604	0.00494604	0.00593525
						E113	SM	5	10~19	3	Master	4	0.0107914	12			5	FH	0.00539568	0.00647482	0.00755396	0.00863309
						E114	T	2	20~29	4	Master	4	0.00899281	10			2	L	0.000899281	0.00179856	0.00179856	0.00269784
						E115	SM	5	10~19	3	Master	4	0.0107914	12			6	H	0.00755396	0.00863309	0.00863309	0.00971223
						E116	SM	5	20~29	4	Master	4	0.0116906	13			3	FL	0.00233813	0.00350719	0.00467626	0.00584532
						E117	SM	5	20~29	4	Master	4	0.0116906	13			3	FL	0.00233813	0.00350719	0.00467626	0.00584532
						E118	JM	4	10~19	3	Master	4	0	0
						E119	T	2	20~29	4	Bachelor	3	0.00809353	9			3	FL	0.00161871	0.00242806	0.00323741	0.00404676
						E120	E	3	GE30	5	Master	4	0.0107914	12			4	M	0.00431655	0.00539568	0.00539568	0.00647482
						E121	JM	4	10~19	3	Master	4	0.00989209	11			5	FH	0.00494604	0.00593525	0.00692446	0.00791367
						E122	SM	5	GE30	5	Bachelor	3	0.0116906	13			7	VH	0.00935252	0.0105216	0.0116906	0.0116906
						E123	SM	5	20~29	4	Master	4	0.0116906	13			3	FL	0.00233813	0.00350719	0.00467626	0.00584532
						E124	SM	5	GE30	5	Bachelor	3	0.0116906	13			4	M	0.00467626	0.00584532	0.00584532	0.00701439
						E125	E	3	20~29	4	PhD	5	0.0107914	12			2	L	0.00107914	0.00215827	0.00215827	0.00323741
						E126	SM	5	10~19	3	PhD	5	0.0116906	13			4	M	0.00467626	0.00584532	0.00584532	0.00701439
						E127	E	3	10~19	3	Bachelor	3	0.00809353	9			3	FL	0.00161871	0.00242806	0.00323741	0.00404676
						E128	T	2	GE30	5	Bachelor	3	0.00899281	10			5	FH	0.0044964	0.00539568	0.00629496	0.00719424
						E129	SM	5	10~19	3	Bachelor	3	0.00989209	11			5	FH	0.00494604	0.00593525	0.00692446	0.00791367
						E130	JM	4	GE30	5	Master	4	0.0116906	13			5	FH	0.00584532	0.00701439	0.00818345	0.00935252
						E131	SM	5	10~19	3	Master	4	0.0107914	12			4	M	0.00431655	0.00539568	0.00539568	0.00647482
						E132	SM	5	10~19	3	Master	4	0	0
						E133	SM	5	GE30	5	Bachelor	3	0.0116906	13			6	H	0.00818345	0.00935252	0.00935252	0.0105216
						E134	E	3	10~19	3	Bachelor	3	0.00809353	9			4	M	0.00323741	0.00404676	0.00404676	0.00485612
						E135	SM	5	GE30	5	Master	4	0.0125899	14			2	L	0.00125899	0.00251799	0.00251799	0.00377698
						E136	SM	5	10~19	3	Master	4	0.0107914	12			5	FH	0.00539568	0.00647482	0.00755396	0.00863309
						E137	SM	5	20~29	4	Master	4	0.0116906	13			1	VL	0	0	0.00116906	0.00233813
													1						0.345054	0.439928	0.493705	0.58723	0.466408	2.40657	0.00392133

## Sheet: BE27
																	BE27
																	sparks from port cranes and stacker/tractor-trailer units (not be intrinsically safe).2
Expression	a	b	c	d		Expert ID	PP	PPS	ST	STS	EL	ELS	Wi	SUM Ei	SUM		Expression No.	Expression	a	b	c	d	FP	C	OR
VL	0	0	0.1	0.2		E1	JM	4	10~19	3	Bachelor	3	0	0	1131
L	0.1	0.2	0.2	0.3		E2	E	3	20~29	4	Bachelor	3	0	0
FL	0.2	0.3	0.4	0.5		E3	E	3	10~19	3	Master	4	0	0
M	0.4	0.5	0.5	0.6		E4	E	3	10~19	3	Master	4	0	0
FH	0.5	0.6	0.7	0.8		E5	E	3	10~19	3	Master	4	0	0
H	0.7	0.8	0.8	0.9		E6	E	3	20~29	4	Bachelor	3	0	0
VH	0.8	0.9	1	1		E7	SM	5	20~29	4	Bachelor	3	0	0
						E8	T	2	20~29	4	Bachelor	3	0	0
						E9	E	3	10~19	3	Master	4	0	0
						E10	T	2	GE30	5	PhD	5	0	0
						E11	T	2	10~19	3	Master	4	0	0
						E12	E	3	GE30	5	Master	4	0	0
						E13	T	2	6~9	2	Bachelor	3	0	0
						E14	JM	4	GE30	5	Bachelor	3	0	0
						E15	T	2	20~29	4	PhD	5	0	0
						E16	SM	5	6~9	2	PhD	5	0	0
						E17	SM	5	10~19	3	Bachelor	3	0	0
						E18	JM	4	10~19	3	Bachelor	3	0	0
						E19	SM	5	20~29	4	Bachelor	3	0	0
						E20	JM	4	GE30	5	Bachelor	3	0	0
						E21	E	3	10~19	3	Bachelor	3	0	0
						E22	E	3	LE5	1	PhD	5	0	0
						E23	T	2	20~29	4	PhD	5	0	0
						E24	T	2	6~9	2	Master	4	0	0
						E25	SM	5	GE30	5	Bachelor	3	0	0
						E26	JM	4	20~29	4	Bachelor	3	0	0
						E27	SM	5	GE30	5	Bachelor	3	0	0
						E28	E	3	GE30	5	Master	4	0	0
						E29	SM	5	10~19	3	Master	4	0.0106101	12			3	FL	0.00212202	0.00318302	0.00424403	0.00530504
						E30	T	2	GE30	5	PhD	5	0.0106101	12			3	FL	0.00212202	0.00318302	0.00424403	0.00530504
						E31	SM	5	20~29	4	VE	2	0.00972591	11			7	VH	0.00778073	0.00875332	0.00972591	0.00972591
						E32	E	3	10~19	3	PhD	5	0.00972591	11			5	FH	0.00486295	0.00583554	0.00680813	0.00778073
						E33	T	2	10~19	3	Master	4	0.00795756	9			5	FH	0.00397878	0.00477454	0.00557029	0.00636605
						E34	SM	5	20~29	4	Master	4	0.0114943	13			2	L	0.00114943	0.00229885	0.00229885	0.00344828
						E35	W	1	10~19	3	Bachelor	3	0	0
						E36	SM	5	20~29	4	Master	4	0.0114943	13			3	FL	0.00229885	0.00344828	0.0045977	0.00574713
						E37	T	2	10~19	3	Bachelor	3	0.00707339	8			4	M	0.00282935	0.00353669	0.00353669	0.00424403
						E38	E	3	LE5	1	Master	4	0	0
						E39	E	3	LE5	1	Master	4	0.00707339	8			5	FH	0.00353669	0.00424403	0.00495137	0.00565871
						E40	E	3	10~19	3	Bachelor	3	0.00795756	9			7	VH	0.00636605	0.0071618	0.00795756	0.00795756
						E41	T	2	6~9	2	Master	4	0.00707339	8			6	H	0.00495137	0.00565871	0.00565871	0.00636605
						E42	JM	4	10~19	3	Bachelor	3	0.00884173	10			2	L	0.000884173	0.00176835	0.00176835	0.00265252
						E43	E	3	6~9	2	Master	4	0.00795756	9			2	L	0.000795756	0.00159151	0.00159151	0.00238727
						E44	JM	4	10~19	3	Master	4	0.00972591	11			6	H	0.00680813	0.00778073	0.00778073	0.00875332
						E45	JM	4	10~19	3	Master	4	0.00972591	11			6	H	0.00680813	0.00778073	0.00778073	0.00875332
						E46	E	3	20~29	4	Bachelor	3	0.00884173	10			5	FH	0.00442087	0.00530504	0.00618921	0.00707339
						E47	E	3	20~29	4	Bachelor	3	0.00884173	10			2	L	0.000884173	0.00176835	0.00176835	0.00265252
						E48	E	3	10~19	3	Bachelor	3	0.00795756	9			4	M	0.00318302	0.00397878	0.00397878	0.00477454
						E49	SM	5	GE30	5	Bachelor	3	0.0114943	13			5	FH	0.00574713	0.00689655	0.00804598	0.0091954
						E50	SM	5	GE30	5	Bachelor	3	0	0
						E51	SM	5	20~29	4	Master	4	0.0114943	13			6	H	0.00804598	0.0091954	0.0091954	0.0103448
						E52	T	2	10~19	3	Master	4	0.00795756	9			5	FH	0.00397878	0.00477454	0.00557029	0.00636605
						E53	SM	5	10~19	3	PhD	5	0.0114943	13			2	L	0.00114943	0.00229885	0.00229885	0.00344828
						E54	JM	4	20~29	4	Bachelor	3	0.00972591	11			3	FL	0.00194518	0.00291777	0.00389036	0.00486295
						E55	SM	5	20~29	4	Master	4	0.0114943	13			1	VL	0	0	0.00114943	0.00229885
						E56	JM	4	20~29	4	Master	4	0.0106101	12			3	FL	0.00212202	0.00318302	0.00424403	0.00530504
						E57	E	3	10~19	3	Master	4	0.00884173	10			4	M	0.00353669	0.00442087	0.00442087	0.00530504
						E58	SM	5	20~29	4	Master	4	0.0114943	13			1	VL	0	0	0.00114943	0.00229885
						E59	JM	4	20~29	4	Master	4	0.0106101	12			4	M	0.00424403	0.00530504	0.00530504	0.00636605
						E60	JM	4	10~19	3	Bachelor	3	0	0
						E61	SM	5	20~29	4	Master	4	0.0114943	13			5	FH	0.00574713	0.00689655	0.00804598	0.0091954
						E62	SM	5	20~29	4	Bachelor	3	0.0106101	12			4	M	0.00424403	0.00530504	0.00530504	0.00636605
						E63	SM	5	GE30	5	Master	4	0.0123784	14			3	FL	0.00247569	0.00371353	0.00495137	0.00618921
						E64	JM	4	10~19	3	Master	4	0.00972591	11			2	L	0.000972591	0.00194518	0.00194518	0.00291777
						E65	JM	4	10~19	3	Bachelor	3	0.00884173	10			4	M	0.00353669	0.00442087	0.00442087	0.00530504
						E66	T	2	GE30	5	VE	2	0	0
						E67	E	3	GE30	5	Master	4	0.0106101	12			2	L	0.00106101	0.00212202	0.00212202	0.00318302
						E68	JM	4	GE30	5	Master	4	0.0114943	13			5	FH	0.00574713	0.00689655	0.00804598	0.0091954
						E69	E	3	20~29	4	Bachelor	3	0.00884173	10
						E70	JM	4	10~19	3	Master	4	0.00972591	11			5	FH	0.00486295	0.00583554	0.00680813	0.00778073
						E71	SM	5	GE30	5	Bachelor	3	0.0114943	13			7	VH	0.0091954	0.0103448	0.0114943	0.0114943
						E72	JM	4	20~29	4	Bachelor	3	0.00972591	11			3	FL	0.00194518	0.00291777	0.00389036	0.00486295
						E73	SM	5	10~19	3	Master	4	0.0106101	12			4	M	0.00424403	0.00530504	0.00530504	0.00636605
						E74	SM	5	20~29	4	Master	4	0.0114943	13			3	FL	0.00229885	0.00344828	0.0045977	0.00574713
						E75	E	3	10~19	3	Master	4	0.00884173	10			3	FL	0.00176835	0.00265252	0.00353669	0.00442087
						E76	SM	5	20~29	4	Master	4	0.0114943	13			3	FL	0.00229885	0.00344828	0.0045977	0.00574713
						E77	SM	5	6~9	2	Master	4	0.00972591	11			4	M	0.00389036	0.00486295	0.00486295	0.00583554
						E78	T	2	10~19	3	Bachelor	3	0.00707339	8			3	FL	0.00141468	0.00212202	0.00282935	0.00353669
						E79	SM	5	10~19	3	VE	2	0.00884173	10			3	FL	0.00176835	0.00265252	0.00353669	0.00442087
						E80	JM	4	GE30	5	Bachelor	3	0.0106101	12			4	M	0.00424403	0.00530504	0.00530504	0.00636605
						E81	E	3	10~19	3	PhD	5	0	0
						E82	JM	4	10~19	3	Bachelor	3	0.00884173	10			2	L	0.000884173	0.00176835	0.00176835	0.00265252
						E83	SM	5	20~29	4	PhD	5	0.0123784	14			5	FH	0.00618921	0.00742706	0.0086649	0.00990274
						E84	SM	5	10~19	3	Master	4	0.0106101	12			5	FH	0.00530504	0.00636605	0.00742706	0.00848806
						E85	JM	4	6~9	2	Bachelor	3	0.00795756	9			6	H	0.00557029	0.00636605	0.00636605	0.0071618
						E86	SM	5	10~19	3	Master	4	0.0106101	12			4	M	0.00424403	0.00530504	0.00530504	0.00636605
						E87	E	3	10~19	3	Bachelor	3	0.00795756	9			3	FL	0.00159151	0.00238727	0.00318302	0.00397878
						E88	SM	5	10~19	3	Master	4	0	0
						E89	SM	5	20~29	4	PhD	5	0.0123784	14			4	M	0.00495137	0.00618921	0.00618921	0.00742706
						E90	E	3	GE30	5	Bachelor	3	0.00972591	11			5	FH	0.00486295	0.00583554	0.00680813	0.00778073
						E91	E	3	10~19	3	Master	4	0.00884173	10			3	FL	0.00176835	0.00265252	0.00353669	0.00442087
						E92	E	3	GE30	5	Bachelor	3	0.00972591	11			2	L	0.000972591	0.00194518	0.00194518	0.00291777
						E93	SM	5	GE30	5	Master	4	0.0123784	14			1	VL	0	0	0.00123784	0.00247569
						E94	SM	5	20~29	4	Master	4	0.0114943	13			4	M	0.0045977	0.00574713	0.00574713	0.00689655
						E95	SM	5	10~19	3	Bachelor	3	0.00972591	11			2	L	0.000972591	0.00194518	0.00194518	0.00291777
						E96	JM	4	20~29	4	Bachelor	3	0.00972591	11			7	VH	0.00778073	0.00875332	0.00972591	0.00972591
						E97	SM	5	GE30	5	Bachelor	3	0.0114943	13			2	L	0.00114943	0.00229885	0.00229885	0.00344828
						E98	JM	4	GE30	5	Master	4	0.0114943	13			4	M	0.0045977	0.00574713	0.00574713	0.00689655
						E99	E	3	6~9	2	Bachelor	3	0.00707339	8			5	FH	0.00353669	0.00424403	0.00495137	0.00565871
						E100	E	3	10~19	3	Bachelor	3	0.00795756	9			4	M	0.00318302	0.00397878	0.00397878	0.00477454
						E101	SM	5	10~19	3	Bachelor	3	0.00972591	11			5	FH	0.00486295	0.00583554	0.00680813	0.00778073
						E102	SM	5	20~29	4	PhD	5	0.0123784	14			5	FH	0.00618921	0.00742706	0.0086649	0.00990274
						E103	SM	5	10~19	3	Bachelor	3	0.00972591	11			3	FL	0.00194518	0.00291777	0.00389036	0.00486295
						E104	SM	5	20~29	4	Bachelor	3	0.0106101	12			4	M	0.00424403	0.00530504	0.00530504	0.00636605
						E105	E	3	10~19	3	Bachelor	3	0.00795756	9			6	H	0.00557029	0.00636605	0.00636605	0.0071618
						E106	SM	5	10~19	3	Bachelor	3	0.00972591	11			4	M	0.00389036	0.00486295	0.00486295	0.00583554
						E107	E	3	20~29	4	Master	4	0.00972591	11			7	VH	0.00778073	0.00875332	0.00972591	0.00972591
						E108	JM	4	10~19	3	Master	4	0.00972591	11			4	M	0.00389036	0.00486295	0.00486295	0.00583554
						E109	E	3	20~29	4	Bachelor	3	0.00884173	10			2	L	0.000884173	0.00176835	0.00176835	0.00265252
						E110	T	2	10~19	3	Bachelor	3	0.00707339	8			1	VL	0	0	0.000707339	0.00141468
						E111	SM	5	GE30	5	Master	4	0.0123784	14			4	M	0.00495137	0.00618921	0.00618921	0.00742706
						E112	JM	4	10~19	3	Master	4	0.00972591	11			4	M	0.00389036	0.00486295	0.00486295	0.00583554
						E113	SM	5	10~19	3	Master	4	0.0106101	12			3	FL	0.00212202	0.00318302	0.00424403	0.00530504
						E114	T	2	20~29	4	Master	4	0.00884173	10			3	FL	0.00176835	0.00265252	0.00353669	0.00442087
						E115	SM	5	10~19	3	Master	4	0.0106101	12			3	FL	0.00212202	0.00318302	0.00424403	0.00530504
						E116	SM	5	20~29	4	Master	4	0.0114943	13			3	FL	0.00229885	0.00344828	0.0045977	0.00574713
						E117	SM	5	20~29	4	Master	4	0.0114943	13			3	FL	0.00229885	0.00344828	0.0045977	0.00574713
						E118	JM	4	10~19	3	Master	4	0	0
						E119	T	2	20~29	4	Bachelor	3	0.00795756	9			3	FL	0.00159151	0.00238727	0.00318302	0.00397878
						E120	E	3	GE30	5	Master	4	0.0106101	12			4	M	0.00424403	0.00530504	0.00530504	0.00636605
						E121	JM	4	10~19	3	Master	4	0.00972591	11			3	FL	0.00194518	0.00291777	0.00389036	0.00486295
						E122	SM	5	GE30	5	Bachelor	3	0.0114943	13			5	FH	0.00574713	0.00689655	0.00804598	0.0091954
						E123	SM	5	20~29	4	Master	4	0.0114943	13			3	FL	0.00229885	0.00344828	0.0045977	0.00574713
						E124	SM	5	GE30	5	Bachelor	3	0.0114943	13			4	M	0.0045977	0.00574713	0.00574713	0.00689655
						E125	E	3	20~29	4	PhD	5	0.0106101	12			2	L	0.00106101	0.00212202	0.00212202	0.00318302
						E126	SM	5	10~19	3	PhD	5	0.0114943	13			4	M	0.0045977	0.00574713	0.00574713	0.00689655
						E127	E	3	10~19	3	Bachelor	3	0.00795756	9			3	FL	0.00159151	0.00238727	0.00318302	0.00397878
						E128	T	2	GE30	5	Bachelor	3	0.00884173	10			5	FH	0.00442087	0.00530504	0.00618921	0.00707339
						E129	SM	5	10~19	3	Bachelor	3	0.00972591	11			5	FH	0.00486295	0.00583554	0.00680813	0.00778073
						E130	JM	4	GE30	5	Master	4	0.0114943	13			5	FH	0.00574713	0.00689655	0.00804598	0.0091954
						E131	SM	5	10~19	3	Master	4	0.0106101	12			3	FL	0.00212202	0.00318302	0.00424403	0.00530504
						E132	SM	5	10~19	3	Master	4	0	0
						E133	SM	5	GE30	5	Bachelor	3	0.0114943	13			6	H	0.00804598	0.0091954	0.0091954	0.0103448
						E134	E	3	10~19	3	Bachelor	3	0.00795756	9			4	M	0.00318302	0.00397878	0.00397878	0.00477454
						E135	SM	5	GE30	5	Master	4	0.0123784	14			2	L	0.00123784	0.00247569	0.00247569	0.00371353
						E136	SM	5	10~19	3	Master	4	0.0106101	12			5	FH	0.00530504	0.00636605	0.00742706	0.00848806
						E137	SM	5	20~29	4	Master	4	0.0114943	13			1	VL	0	0	0.00114943	0.00229885
													1						0.341733	0.435455	0.490716	0.584969	0.463246	2.41678	0.00383016

## Sheet: BE28
																	BE28
																	sparks from using cargo conveyer belts.
Expression	a	b	c	d		Expert ID	PP	PPS	ST	STS	EL	ELS	Wi	SUM Ei	SUM		Expression No.	Expression	a	b	c	d	FP	C	OR
VL	0	0	0.1	0.2		E1	JM	4	10~19	3	Bachelor	3	0	0	1110
L	0.1	0.2	0.2	0.3		E2	E	3	20~29	4	Bachelor	3	0	0
FL	0.2	0.3	0.4	0.5		E3	E	3	10~19	3	Master	4	0	0
M	0.4	0.5	0.5	0.6		E4	E	3	10~19	3	Master	4	0	0
FH	0.5	0.6	0.7	0.8		E5	E	3	10~19	3	Master	4	0	0
H	0.7	0.8	0.8	0.9		E6	E	3	20~29	4	Bachelor	3	0	0
VH	0.8	0.9	1	1		E7	SM	5	20~29	4	Bachelor	3	0	0
						E8	T	2	20~29	4	Bachelor	3	0	0
						E9	E	3	10~19	3	Master	4	0	0
						E10	T	2	GE30	5	PhD	5	0	0
						E11	T	2	10~19	3	Master	4	0	0
						E12	E	3	GE30	5	Master	4	0	0
						E13	T	2	6~9	2	Bachelor	3	0	0
						E14	JM	4	GE30	5	Bachelor	3	0	0
						E15	T	2	20~29	4	PhD	5	0	0
						E16	SM	5	6~9	2	PhD	5	0	0
						E17	SM	5	10~19	3	Bachelor	3	0	0
						E18	JM	4	10~19	3	Bachelor	3	0	0
						E19	SM	5	20~29	4	Bachelor	3	0	0
						E20	JM	4	GE30	5	Bachelor	3	0	0
						E21	E	3	10~19	3	Bachelor	3	0	0
						E22	E	3	LE5	1	PhD	5	0	0
						E23	T	2	20~29	4	PhD	5	0	0
						E24	T	2	6~9	2	Master	4	0	0
						E25	SM	5	GE30	5	Bachelor	3	0	0
						E26	JM	4	20~29	4	Bachelor	3	0	0
						E27	SM	5	GE30	5	Bachelor	3	0	0
						E28	E	3	GE30	5	Master	4	0	0
						E29	SM	5	10~19	3	Master	4	0.0108108	12			3	FL	0.00216216	0.00324324	0.00432432	0.00540541
						E30	T	2	GE30	5	PhD	5	0.0108108	12			3	FL	0.00216216	0.00324324	0.00432432	0.00540541
						E31	SM	5	20~29	4	VE	2	0.00990991	11			5	FH	0.00495495	0.00594595	0.00693694	0.00792793
						E32	E	3	10~19	3	PhD	5	0.00990991	11			5	FH	0.00495495	0.00594595	0.00693694	0.00792793
						E33	T	2	10~19	3	Master	4	0.00810811	9			5	FH	0.00405405	0.00486486	0.00567568	0.00648649
						E34	SM	5	20~29	4	Master	4	0.0117117	13			2	L	0.00117117	0.00234234	0.00234234	0.00351351
						E35	W	1	10~19	3	Bachelor	3	0	0
						E36	SM	5	20~29	4	Master	4	0.0117117	13			2	L	0.00117117	0.00234234	0.00234234	0.00351351
						E37	T	2	10~19	3	Bachelor	3	0.00720721	8			4	M	0.00288288	0.0036036	0.0036036	0.00432432
						E38	E	3	LE5	1	Master	4	0	0
						E39	E	3	LE5	1	Master	4	0.00720721	8			6	H	0.00504505	0.00576577	0.00576577	0.00648649
						E40	E	3	10~19	3	Bachelor	3	0.00810811	9			7	VH	0.00648649	0.0072973	0.00810811	0.00810811
						E41	T	2	6~9	2	Master	4	0.00720721	8			6	H	0.00504505	0.00576577	0.00576577	0.00648649
						E42	JM	4	10~19	3	Bachelor	3	0.00900901	10			2	L	0.000900901	0.0018018	0.0018018	0.0027027
						E43	E	3	6~9	2	Master	4	0.00810811	9			4	M	0.00324324	0.00405405	0.00405405	0.00486486
						E44	JM	4	10~19	3	Master	4	0.00990991	11			5	FH	0.00495495	0.00594595	0.00693694	0.00792793
						E45	JM	4	10~19	3	Master	4	0.00990991	11			6	H	0.00693694	0.00792793	0.00792793	0.00891892
						E46	E	3	20~29	4	Bachelor	3	0.00900901	10			5	FH	0.0045045	0.00540541	0.00630631	0.00720721
						E47	E	3	20~29	4	Bachelor	3	0.00900901	10			2	L	0.000900901	0.0018018	0.0018018	0.0027027
						E48	E	3	10~19	3	Bachelor	3	0.00810811	9			3	FL	0.00162162	0.00243243	0.00324324	0.00405405
						E49	SM	5	GE30	5	Bachelor	3	0.0117117	13			4	M	0.00468468	0.00585586	0.00585586	0.00702703
						E50	SM	5	GE30	5	Bachelor	3	0	0
						E51	SM	5	20~29	4	Master	4	0.0117117	13			6	H	0.0081982	0.00936937	0.00936937	0.0105405
						E52	T	2	10~19	3	Master	4	0.00810811	9			5	FH	0.00405405	0.00486486	0.00567568	0.00648649
						E53	SM	5	10~19	3	PhD	5	0.0117117	13			2	L	0.00117117	0.00234234	0.00234234	0.00351351
						E54	JM	4	20~29	4	Bachelor	3	0.00990991	11			3	FL	0.00198198	0.00297297	0.00396396	0.00495495
						E55	SM	5	20~29	4	Master	4	0.0117117	13			1	VL	0	0	0.00117117	0.00234234
						E56	JM	4	20~29	4	Master	4	0.0108108	12			2	L	0.00108108	0.00216216	0.00216216	0.00324324
						E57	E	3	10~19	3	Master	4	0.00900901	10			3	FL	0.0018018	0.0027027	0.0036036	0.0045045
						E58	SM	5	20~29	4	Master	4	0.0117117	13			1	VL	0	0	0.00117117	0.00234234
						E59	JM	4	20~29	4	Master	4	0.0108108	12			3	FL	0.00216216	0.00324324	0.00432432	0.00540541
						E60	JM	4	10~19	3	Bachelor	3	0	0
						E61	SM	5	20~29	4	Master	4	0.0117117	13			5	FH	0.00585586	0.00702703	0.0081982	0.00936937
						E62	SM	5	20~29	4	Bachelor	3	0.0108108	12			4	M	0.00432432	0.00540541	0.00540541	0.00648649
						E63	SM	5	GE30	5	Master	4	0.0126126	14			3	FL	0.00252252	0.00378378	0.00504505	0.00630631
						E64	JM	4	10~19	3	Master	4	0.00990991	11			2	L	0.000990991	0.00198198	0.00198198	0.00297297
						E65	JM	4	10~19	3	Bachelor	3	0.00900901	10			4	M	0.0036036	0.0045045	0.0045045	0.00540541
						E66	T	2	GE30	5	VE	2	0	0
						E67	E	3	GE30	5	Master	4	0.0108108	12			3	FL	0.00216216	0.00324324	0.00432432	0.00540541
						E68	JM	4	GE30	5	Master	4	0.0117117	13			6	H	0.0081982	0.00936937	0.00936937	0.0105405
						E69	E	3	20~29	4	Bachelor	3	0	0
						E70	JM	4	10~19	3	Master	4	0.00990991	11			4	M	0.00396396	0.00495495	0.00495495	0.00594595
						E71	SM	5	GE30	5	Bachelor	3	0.0117117	13			3	FL	0.00234234	0.00351351	0.00468468	0.00585586
						E72	JM	4	20~29	4	Bachelor	3	0.00990991	11			4	M	0.00396396	0.00495495	0.00495495	0.00594595
						E73	SM	5	10~19	3	Master	4	0.0108108	12			4	M	0.00432432	0.00540541	0.00540541	0.00648649
						E74	SM	5	20~29	4	Master	4	0.0117117	13			3	FL	0.00234234	0.00351351	0.00468468	0.00585586
						E75	E	3	10~19	3	Master	4	0.00900901	10			3	FL	0.0018018	0.0027027	0.0036036	0.0045045
						E76	SM	5	20~29	4	Master	4	0.0117117	13			1	VL	0	0	0.00117117	0.00234234
						E77	SM	5	6~9	2	Master	4	0.00990991	11			5	FH	0.00495495	0.00594595	0.00693694	0.00792793
						E78	T	2	10~19	3	Bachelor	3	0.00720721	8			3	FL	0.00144144	0.00216216	0.00288288	0.0036036
						E79	SM	5	10~19	3	VE	2	0.00900901	10			3	FL	0.0018018	0.0027027	0.0036036	0.0045045
						E80	JM	4	GE30	5	Bachelor	3	0.0108108	12			3	FL	0.00216216	0.00324324	0.00432432	0.00540541
						E81	E	3	10~19	3	PhD	5	0	0
						E82	JM	4	10~19	3	Bachelor	3	0.00900901	10			2	L	0.000900901	0.0018018	0.0018018	0.0027027
						E83	SM	5	20~29	4	PhD	5	0.0126126	14			4	M	0.00504505	0.00630631	0.00630631	0.00756757
						E84	SM	5	10~19	3	Master	4	0.0108108	12			4	M	0.00432432	0.00540541	0.00540541	0.00648649
						E85	JM	4	6~9	2	Bachelor	3	0.00810811	9			6	H	0.00567568	0.00648649	0.00648649	0.0072973
						E86	SM	5	10~19	3	Master	4	0.0108108	12			3	FL	0.00216216	0.00324324	0.00432432	0.00540541
						E87	E	3	10~19	3	Bachelor	3	0.00810811	9			4	M	0.00324324	0.00405405	0.00405405	0.00486486
						E88	SM	5	10~19	3	Master	4	0	0
						E89	SM	5	20~29	4	PhD	5	0.0126126	14			4	M	0.00504505	0.00630631	0.00630631	0.00756757
						E90	E	3	GE30	5	Bachelor	3	0.00990991	11			2	L	0.000990991	0.00198198	0.00198198	0.00297297
						E91	E	3	10~19	3	Master	4	0.00900901	10			2	L	0.000900901	0.0018018	0.0018018	0.0027027
						E92	E	3	GE30	5	Bachelor	3	0.00990991	11			7	VH	0.00792793	0.00891892	0.00990991	0.00990991
						E93	SM	5	GE30	5	Master	4	0.0126126	14			1	VL	0	0	0.00126126	0.00252252
						E94	SM	5	20~29	4	Master	4	0.0117117	13			3	FL	0.00234234	0.00351351	0.00468468	0.00585586
						E95	SM	5	10~19	3	Bachelor	3	0.00990991	11			2	L	0.000990991	0.00198198	0.00198198	0.00297297
						E96	JM	4	20~29	4	Bachelor	3	0.00990991	11			5	FH	0.00495495	0.00594595	0.00693694	0.00792793
						E97	SM	5	GE30	5	Bachelor	3	0.0117117	13			4	M	0.00468468	0.00585586	0.00585586	0.00702703
						E98	JM	4	GE30	5	Master	4	0.0117117	13			3	FL	0.00234234	0.00351351	0.00468468	0.00585586
						E99	E	3	6~9	2	Bachelor	3	0.00720721	8			5	FH	0.0036036	0.00432432	0.00504505	0.00576577
						E100	E	3	10~19	3	Bachelor	3	0.00810811	9			4	M	0.00324324	0.00405405	0.00405405	0.00486486
						E101	SM	5	10~19	3	Bachelor	3	0.00990991	11			5	FH	0.00495495	0.00594595	0.00693694	0.00792793
						E102	SM	5	20~29	4	PhD	5	0.0126126	14			5	FH	0.00630631	0.00756757	0.00882883	0.0100901
						E103	SM	5	10~19	3	Bachelor	3	0.00990991	11			2	L	0.000990991	0.00198198	0.00198198	0.00297297
						E104	SM	5	20~29	4	Bachelor	3	0.0108108	12			3	FL	0.00216216	0.00324324	0.00432432	0.00540541
						E105	E	3	10~19	3	Bachelor	3	0.00810811	9			5	FH	0.00405405	0.00486486	0.00567568	0.00648649
						E106	SM	5	10~19	3	Bachelor	3	0.00990991	11			4	M	0.00396396	0.00495495	0.00495495	0.00594595
						E107	E	3	20~29	4	Master	4	0	0
						E108	JM	4	10~19	3	Master	4	0.00990991	11			5	FH	0.00495495	0.00594595	0.00693694	0.00792793
						E109	E	3	20~29	4	Bachelor	3	0.00900901	10			2	L	0.000900901	0.0018018	0.0018018	0.0027027
						E110	T	2	10~19	3	Bachelor	3	0.00720721	8			1	VL	0	0	0.000720721	0.00144144
						E111	SM	5	GE30	5	Master	4	0.0126126	14			4	M	0.00504505	0.00630631	0.00630631	0.00756757
						E112	JM	4	10~19	3	Master	4	0.00990991	11			4	M	0.00396396	0.00495495	0.00495495	0.00594595
						E113	SM	5	10~19	3	Master	4	0.0108108	12			3	FL	0.00216216	0.00324324	0.00432432	0.00540541
						E114	T	2	20~29	4	Master	4	0.00900901	10			4	M	0.0036036	0.0045045	0.0045045	0.00540541
						E115	SM	5	10~19	3	Master	4	0.0108108	12			3	FL	0.00216216	0.00324324	0.00432432	0.00540541
						E116	SM	5	20~29	4	Master	4	0.0117117	13			2	L	0.00117117	0.00234234	0.00234234	0.00351351
						E117	SM	5	20~29	4	Master	4	0.0117117	13			2	L	0.00117117	0.00234234	0.00234234	0.00351351
						E118	JM	4	10~19	3	Master	4	0	0
						E119	T	2	20~29	4	Bachelor	3	0.00810811	9			3	FL	0.00162162	0.00243243	0.00324324	0.00405405
						E120	E	3	GE30	5	Master	4	0.0108108	12			3	FL	0.00216216	0.00324324	0.00432432	0.00540541
						E121	JM	4	10~19	3	Master	4	0.00990991	11			4	M	0.00396396	0.00495495	0.00495495	0.00594595
						E122	SM	5	GE30	5	Bachelor	3	0.0117117	13			3	FL	0.00234234	0.00351351	0.00468468	0.00585586
						E123	SM	5	20~29	4	Master	4	0.0117117	13			2	L	0.00117117	0.00234234	0.00234234	0.00351351
						E124	SM	5	GE30	5	Bachelor	3	0.0117117	13			4	M	0.00468468	0.00585586	0.00585586	0.00702703
						E125	E	3	20~29	4	PhD	5	0.0108108	12			2	L	0.00108108	0.00216216	0.00216216	0.00324324
						E126	SM	5	10~19	3	PhD	5	0.0117117	13			4	M	0.00468468	0.00585586	0.00585586	0.00702703
						E127	E	3	10~19	3	Bachelor	3	0.00810811	9			3	FL	0.00162162	0.00243243	0.00324324	0.00405405
						E128	T	2	GE30	5	Bachelor	3	0.00900901	10			5	FH	0.0045045	0.00540541	0.00630631	0.00720721
						E129	SM	5	10~19	3	Bachelor	3	0.00990991	11			5	FH	0.00495495	0.00594595	0.00693694	0.00792793
						E130	JM	4	GE30	5	Master	4	0.0117117	13			6	H	0.0081982	0.00936937	0.00936937	0.0105405
						E131	SM	5	10~19	3	Master	4	0.0108108	12			4	M	0.00432432	0.00540541	0.00540541	0.00648649
						E132	SM	5	10~19	3	Master	4	0	0
						E133	SM	5	GE30	5	Bachelor	3	0.0117117	13			6	H	0.0081982	0.00936937	0.00936937	0.0105405
						E134	E	3	10~19	3	Bachelor	3	0.00810811	9			4	M	0.00324324	0.00405405	0.00405405	0.00486486
						E135	SM	5	GE30	5	Master	4	0.0126126	14			3	FL	0.00252252	0.00378378	0.00504505	0.00630631
						E136	SM	5	10~19	3	Master	4	0.0108108	12			6	H	0.00756757	0.00864865	0.00864865	0.00972973
						E137	SM	5	20~29	4	Master	4	0.0117117	13			1	VL	0	0	0.00117117	0.00234234
													1						0.317838	0.411171	0.460991	0.559189	0.437564	2.50185	0.00314887

## Sheet: BE29
																	BE29
																	dropping large items of cargo during operation.
Expression	a	b	c	d		Expert ID	PP	PPS	ST	STS	EL	ELS	Wi	SUM Ei	SUM		Expression No.	Expression	a	b	c	d	FP	C	OR
VL	0	0	0.1	0.2		E1	JM	4	10~19	3	Bachelor	3	0	0	1113
L	0.1	0.2	0.2	0.3		E2	E	3	20~29	4	Bachelor	3	0	0
FL	0.2	0.3	0.4	0.5		E3	E	3	10~19	3	Master	4	0	0
M	0.4	0.5	0.5	0.6		E4	E	3	10~19	3	Master	4	0	0
FH	0.5	0.6	0.7	0.8		E5	E	3	10~19	3	Master	4	0	0
H	0.7	0.8	0.8	0.9		E6	E	3	20~29	4	Bachelor	3	0	0
VH	0.8	0.9	1	1		E7	SM	5	20~29	4	Bachelor	3	0	0
						E8	T	2	20~29	4	Bachelor	3	0	0
						E9	E	3	10~19	3	Master	4	0	0
						E10	T	2	GE30	5	PhD	5	0	0
						E11	T	2	10~19	3	Master	4	0	0
						E12	E	3	GE30	5	Master	4	0	0
						E13	T	2	6~9	2	Bachelor	3	0	0
						E14	JM	4	GE30	5	Bachelor	3	0	0
						E15	T	2	20~29	4	PhD	5	0	0
						E16	SM	5	6~9	2	PhD	5	0	0
						E17	SM	5	10~19	3	Bachelor	3	0	0
						E18	JM	4	10~19	3	Bachelor	3	0	0
						E19	SM	5	20~29	4	Bachelor	3	0	0
						E20	JM	4	GE30	5	Bachelor	3	0	0
						E21	E	3	10~19	3	Bachelor	3	0	0
						E22	E	3	LE5	1	PhD	5	0	0
						E23	T	2	20~29	4	PhD	5	0	0
						E24	T	2	6~9	2	Master	4	0	0
						E25	SM	5	GE30	5	Bachelor	3	0	0
						E26	JM	4	20~29	4	Bachelor	3	0	0
						E27	SM	5	GE30	5	Bachelor	3	0	0
						E28	E	3	GE30	5	Master	4	0	0
						E29	SM	5	10~19	3	Master	4	0.0107817	12			3	FL	0.00215633	0.0032345	0.00431267	0.00539084
						E30	T	2	GE30	5	PhD	5	0.0107817	12			3	FL	0.00215633	0.0032345	0.00431267	0.00539084
						E31	SM	5	20~29	4	VE	2	0.0098832	11			2	L	0.00098832	0.00197664	0.00197664	0.00296496
						E32	E	3	10~19	3	PhD	5	0.0098832	11			3	FL	0.00197664	0.00296496	0.00395328	0.0049416
						E33	T	2	10~19	3	Master	4	0.00808625	9			5	FH	0.00404313	0.00485175	0.00566038	0.006469
						E34	SM	5	20~29	4	Master	4	0.0116801	13			2	L	0.00116801	0.00233603	0.00233603	0.00350404
						E35	W	1	10~19	3	Bachelor	3	0	0
						E36	SM	5	20~29	4	Master	4	0.0116801	13			1	VL	0	0	0.00116801	0.00233603
						E37	T	2	10~19	3	Bachelor	3	0.00718778	8			2	L	0.000718778	0.00143756	0.00143756	0.00215633
						E38	E	3	LE5	1	Master	4	0	0
						E39	E	3	LE5	1	Master	4	0.00718778	8			6	H	0.00503145	0.00575022	0.00575022	0.006469
						E40	E	3	10~19	3	Bachelor	3	0.00808625	9			7	VH	0.006469	0.00727763	0.00808625	0.00808625
						E41	T	2	6~9	2	Master	4	0	0
						E42	JM	4	10~19	3	Bachelor	3	0.00898473	10			3	FL	0.00179695	0.00269542	0.00359389	0.00449236
						E43	E	3	6~9	2	Master	4	0.00808625	9			5	FH	0.00404313	0.00485175	0.00566038	0.006469
						E44	JM	4	10~19	3	Master	4	0.0098832	11			5	FH	0.0049416	0.00592992	0.00691824	0.00790656
						E45	JM	4	10~19	3	Master	4	0.0098832	11			4	M	0.00395328	0.0049416	0.0049416	0.00592992
						E46	E	3	20~29	4	Bachelor	3	0.00898473	10			5	FH	0.00449236	0.00539084	0.00628931	0.00718778
						E47	E	3	20~29	4	Bachelor	3	0.00898473	10			2	L	0.000898473	0.00179695	0.00179695	0.00269542
						E48	E	3	10~19	3	Bachelor	3	0.00808625	9			2	L	0.000808625	0.00161725	0.00161725	0.00242588
						E49	SM	5	GE30	5	Bachelor	3	0.0116801	13			4	M	0.00467206	0.00584007	0.00584007	0.00700809
						E50	SM	5	GE30	5	Bachelor	3	0	0
						E51	SM	5	20~29	4	Master	4	0.0116801	13			5	FH	0.00584007	0.00700809	0.0081761	0.00934412
						E52	T	2	10~19	3	Master	4	0.00808625	9			4	M	0.0032345	0.00404313	0.00404313	0.00485175
						E53	SM	5	10~19	3	PhD	5	0.0116801	13			3	FL	0.00233603	0.00350404	0.00467206	0.00584007
						E54	JM	4	20~29	4	Bachelor	3	0.0098832	11			2	L	0.00098832	0.00197664	0.00197664	0.00296496
						E55	SM	5	20~29	4	Master	4	0.0116801	13			4	M	0.00467206	0.00584007	0.00584007	0.00700809
						E56	JM	4	20~29	4	Master	4	0.0107817	12			2	L	0.00107817	0.00215633	0.00215633	0.0032345
						E57	E	3	10~19	3	Master	4	0.00898473	10			3	FL	0.00179695	0.00269542	0.00359389	0.00449236
						E58	SM	5	20~29	4	Master	4	0.0116801	13			1	VL	0	0	0.00116801	0.00233603
						E59	JM	4	20~29	4	Master	4	0.0107817	12			5	FH	0.00539084	0.006469	0.00754717	0.00862534
						E60	JM	4	10~19	3	Bachelor	3	0	0
						E61	SM	5	20~29	4	Master	4	0.0116801	13			5	FH	0.00584007	0.00700809	0.0081761	0.00934412
						E62	SM	5	20~29	4	Bachelor	3	0.0107817	12			4	M	0.00431267	0.00539084	0.00539084	0.006469
						E63	SM	5	GE30	5	Master	4	0.0125786	14			3	FL	0.00251572	0.00377358	0.00503145	0.00628931
						E64	JM	4	10~19	3	Master	4	0.0098832	11			2	L	0.00098832	0.00197664	0.00197664	0.00296496
						E65	JM	4	10~19	3	Bachelor	3	0.00898473	10			4	M	0.00359389	0.00449236	0.00449236	0.00539084
						E66	T	2	GE30	5	VE	2	0	0
						E67	E	3	GE30	5	Master	4	0.0107817	12			2	L	0.00107817	0.00215633	0.00215633	0.0032345
						E68	JM	4	GE30	5	Master	4	0.0116801	13			5	FH	0.00584007	0.00700809	0.0081761	0.00934412
						E69	E	3	20~29	4	Bachelor	3	0	0
						E70	JM	4	10~19	3	Master	4	0.0098832	11			5	FH	0.0049416	0.00592992	0.00691824	0.00790656
						E71	SM	5	GE30	5	Bachelor	3	0.0116801	13			3	FL	0.00233603	0.00350404	0.00467206	0.00584007
						E72	JM	4	20~29	4	Bachelor	3	0.0098832	11			3	FL	0.00197664	0.00296496	0.00395328	0.0049416
						E73	SM	5	10~19	3	Master	4	0.0107817	12			3	FL	0.00215633	0.0032345	0.00431267	0.00539084
						E74	SM	5	20~29	4	Master	4	0.0116801	13			3	FL	0.00233603	0.00350404	0.00467206	0.00584007
						E75	E	3	10~19	3	Master	4	0.00898473	10			3	FL	0.00179695	0.00269542	0.00359389	0.00449236
						E76	SM	5	20~29	4	Master	4	0.0116801	13			2	L	0.00116801	0.00233603	0.00233603	0.00350404
						E77	SM	5	6~9	2	Master	4	0.0098832	11			3	FL	0.00197664	0.00296496	0.00395328	0.0049416
						E78	T	2	10~19	3	Bachelor	3	0.00718778	8			3	FL	0.00143756	0.00215633	0.00287511	0.00359389
						E79	SM	5	10~19	3	VE	2	0.00898473	10			2	L	0.000898473	0.00179695	0.00179695	0.00269542
						E80	JM	4	GE30	5	Bachelor	3	0.0107817	12			3	FL	0.00215633	0.0032345	0.00431267	0.00539084
						E81	E	3	10~19	3	PhD	5	0	0
						E82	JM	4	10~19	3	Bachelor	3	0.00898473	10			2	L	0.000898473	0.00179695	0.00179695	0.00269542
						E83	SM	5	20~29	4	PhD	5	0.0125786	14			4	M	0.00503145	0.00628931	0.00628931	0.00754717
						E84	SM	5	10~19	3	Master	4	0.0107817	12			3	FL	0.00215633	0.0032345	0.00431267	0.00539084
						E85	JM	4	6~9	2	Bachelor	3	0.00808625	9			4	M	0.0032345	0.00404313	0.00404313	0.00485175
						E86	SM	5	10~19	3	Master	4	0.0107817	12			3	FL	0.00215633	0.0032345	0.00431267	0.00539084
						E87	E	3	10~19	3	Bachelor	3	0.00808625	9			1	VL	0	0	0.000808625	0.00161725
						E88	SM	5	10~19	3	Master	4	0	0
						E89	SM	5	20~29	4	PhD	5	0.0125786	14			4	M	0.00503145	0.00628931	0.00628931	0.00754717
						E90	E	3	GE30	5	Bachelor	3	0.0098832	11			1	VL	0	0	0.00098832	0.00197664
						E91	E	3	10~19	3	Master	4	0.00898473	10			1	VL	0	0	0.000898473	0.00179695
						E92	E	3	GE30	5	Bachelor	3	0.0098832	11			2	L	0.00098832	0.00197664	0.00197664	0.00296496
						E93	SM	5	GE30	5	Master	4	0.0125786	14			1	VL	0	0	0.00125786	0.00251572
						E94	SM	5	20~29	4	Master	4	0.0116801	13			3	FL	0.00233603	0.00350404	0.00467206	0.00584007
						E95	SM	5	10~19	3	Bachelor	3	0.0098832	11			2	L	0.00098832	0.00197664	0.00197664	0.00296496
						E96	JM	4	20~29	4	Bachelor	3	0.0098832	11			5	FH	0.0049416	0.00592992	0.00691824	0.00790656
						E97	SM	5	GE30	5	Bachelor	3	0.0116801	13			4	M	0.00467206	0.00584007	0.00584007	0.00700809
						E98	JM	4	GE30	5	Master	4	0.0116801	13			2	L	0.00116801	0.00233603	0.00233603	0.00350404
						E99	E	3	6~9	2	Bachelor	3	0.00718778	8			5	FH	0.00359389	0.00431267	0.00503145	0.00575022
						E100	E	3	10~19	3	Bachelor	3	0.00808625	9			1	VL	0	0	0.000808625	0.00161725
						E101	SM	5	10~19	3	Bachelor	3	0.0098832	11			5	FH	0.0049416	0.00592992	0.00691824	0.00790656
						E102	SM	5	20~29	4	PhD	5	0.0125786	14			6	H	0.00880503	0.0100629	0.0100629	0.0113208
						E103	SM	5	10~19	3	Bachelor	3	0.0098832	11			3	FL	0.00197664	0.00296496	0.00395328	0.0049416
						E104	SM	5	20~29	4	Bachelor	3	0.0107817	12			1	VL	0	0	0.00107817	0.00215633
						E105	E	3	10~19	3	Bachelor	3	0.00808625	9			5	FH	0.00404313	0.00485175	0.00566038	0.006469
						E106	SM	5	10~19	3	Bachelor	3	0.0098832	11			4	M	0.00395328	0.0049416	0.0049416	0.00592992
						E107	E	3	20~29	4	Master	4	0.0098832	11			7	VH	0.00790656	0.00889488	0.0098832	0.0098832
						E108	JM	4	10~19	3	Master	4	0.0098832	11			4	M	0.00395328	0.0049416	0.0049416	0.00592992
						E109	E	3	20~29	4	Bachelor	3	0.00898473	10			2	L	0.000898473	0.00179695	0.00179695	0.00269542
						E110	T	2	10~19	3	Bachelor	3	0.00718778	8			1	VL	0	0	0.000718778	0.00143756
						E111	SM	5	GE30	5	Master	4	0.0125786	14			4	M	0.00503145	0.00628931	0.00628931	0.00754717
						E112	JM	4	10~19	3	Master	4	0.0098832	11			4	M	0.00395328	0.0049416	0.0049416	0.00592992
						E113	SM	5	10~19	3	Master	4	0.0107817	12			3	FL	0.00215633	0.0032345	0.00431267	0.00539084
						E114	T	2	20~29	4	Master	4	0.00898473	10			2	L	0.000898473	0.00179695	0.00179695	0.00269542
						E115	SM	5	10~19	3	Master	4	0.0107817	12			5	FH	0.00539084	0.006469	0.00754717	0.00862534
						E116	SM	5	20~29	4	Master	4	0.0116801	13			1	VL	0	0	0.00116801	0.00233603
						E117	SM	5	20~29	4	Master	4	0.0116801	13			1	VL	0	0	0.00116801	0.00233603
						E118	JM	4	10~19	3	Master	4	0	0
						E119	T	2	20~29	4	Bachelor	3	0.00808625	9			2	L	0.000808625	0.00161725	0.00161725	0.00242588
						E120	E	3	GE30	5	Master	4	0.0107817	12			6	H	0.00754717	0.00862534	0.00862534	0.0097035
						E121	JM	4	10~19	3	Master	4	0.0098832	11			5	FH	0.0049416	0.00592992	0.00691824	0.00790656
						E122	SM	5	GE30	5	Bachelor	3	0.0116801	13			2	L	0.00116801	0.00233603	0.00233603	0.00350404
						E123	SM	5	20~29	4	Master	4	0.0116801	13			4	M	0.00467206	0.00584007	0.00584007	0.00700809
						E124	SM	5	GE30	5	Bachelor	3	0.0116801	13			4	M	0.00467206	0.00584007	0.00584007	0.00700809
						E125	E	3	20~29	4	PhD	5	0.0107817	12			2	L	0.00107817	0.00215633	0.00215633	0.0032345
						E126	SM	5	10~19	3	PhD	5	0.0116801	13			4	M	0.00467206	0.00584007	0.00584007	0.00700809
						E127	E	3	10~19	3	Bachelor	3	0.00808625	9			3	FL	0.00161725	0.00242588	0.0032345	0.00404313
						E128	T	2	GE30	5	Bachelor	3	0.00898473	10			3	FL	0.00179695	0.00269542	0.00359389	0.00449236
						E129	SM	5	10~19	3	Bachelor	3	0.0098832	11			5	FH	0.0049416	0.00592992	0.00691824	0.00790656
						E130	JM	4	GE30	5	Master	4	0.0116801	13			5	FH	0.00584007	0.00700809	0.0081761	0.00934412
						E131	SM	5	10~19	3	Master	4	0.0107817	12			4	M	0.00431267	0.00539084	0.00539084	0.006469
						E132	SM	5	10~19	3	Master	4	0	0
						E133	SM	5	GE30	5	Bachelor	3	0.0116801	13			5	FH	0.00584007	0.00700809	0.0081761	0.00934412
						E134	E	3	10~19	3	Bachelor	3	0.00808625	9			3	FL	0.00161725	0.00242588	0.0032345	0.00404313
						E135	SM	5	GE30	5	Master	4	0.0125786	14			2	L	0.00125786	0.00251572	0.00251572	0.00377358
						E136	SM	5	10~19	3	Master	4	0.0107817	12			4	M	0.00431267	0.00539084	0.00539084	0.006469
						E137	SM	5	20~29	4	Master	4	0.0116801	13			1	VL	0	0	0.00116801	0.00233603
													1						0.275202	0.362803	0.418329	0.516532	0.39377	2.65694	0.00220323

[truncated: 9 more sheets: BE30, BE31, BE32, BE33, BE34, BE35, BE36-38, BE39,BE41, BE40]
